# Supplementary material for: Limiting RyR2 Open Time Prevents Alzheimer’s Disease-Related Neuronal Hyperactivity and Memory Loss but Not β-Amyloid Accumulation
Source: PubMed Central journal article supplement — Cell Rep. Author manuscript; Available in PMC 2020 Oct 3. (PMC7532726; doi:10.1016/j.celrep.2020.108169), 2020-09-22
Supplement: NIHMS1631917-supplement-2.pdf [file NIHMS1631917-supplement-2.pdf]

# Limiting RyR2 Open Time Prevents Alzheimer’s Disease-Related Neuronal Hyperactivity and Memory Loss but Not $\beta$ -Amyloid Accumulation

## Graphical Abstract

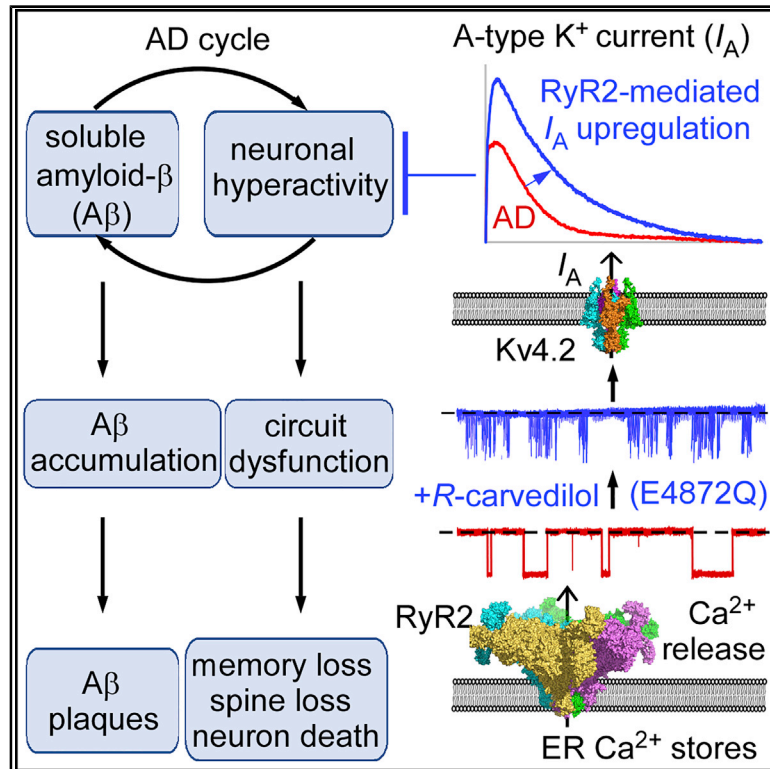

## Authors

Jinjing Yao, Bo Sun, Adam Institoris, ..., Ray W. Turner, Grant R. Gordon, S.R. Wayne Chen

## Correspondence

swchen@ucalgary.ca

## In Brief

Yao et al. show that genetically or pharmacologically limiting the open duration of ryanodine receptor 2 upregulates the A-type potassium current and prevents neuronal hyperexcitability and hyperactivity, memory impairment, neuronal cell death, and dendritic spine loss in a severe early-onset Alzheimer’s disease mouse model, even with continued accumulation of  $\beta$ -amyloid.

## Highlights

- Limiting RyR2 open time prevents neuronal hyperactivity as well as major AD deficits
- Limiting RyR2 open time enhances A-type K<sup>+</sup> current to constrain neuronal excitability
- R-carvedilol rescues AD-related neuronal hyperactivity, memory loss, and cell death
- AD deficits can be prevented in the face of continued  $\beta$ -amyloid accumulation

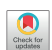

## Article

# Limiting RyR2 Open Time Prevents Alzheimer's Disease-Related Neuronal Hyperactivity and Memory Loss but Not $\beta$ -Amyloid Accumulation

Jinjing Yao,<sup>1,7</sup> Bo Sun,<sup>1,2,7</sup> Adam Institoris,<sup>3</sup> Xiaoqin Zhan,<sup>4</sup> Wenting Guo,<sup>1</sup> Zhenpeng Song,<sup>1</sup> Yajing Liu,<sup>1</sup> Florian Hiess,<sup>1</sup> Andrew K.J. Boyce,<sup>4</sup> Mingke Ni,<sup>1</sup> Ruiwu Wang,<sup>1</sup> Henk ter Keurs,<sup>1</sup> Thomas G. Back,<sup>5</sup> Michael Fill,<sup>6</sup> Roger J. Thompson,<sup>4</sup> Ray W. Turner,<sup>4</sup> Grant R. Gordon,<sup>3</sup> and S.R. Wayne Chen<sup>1,6,8,\*</sup>

<sup>1</sup>Libin Cardiovascular Institute, Department of Physiology and Pharmacology, Cumming School of Medicine, University of Calgary, Calgary, AB T2N 1N4, Canada

<sup>2</sup>Medical School, Kunming University of Science and Technology, Kunming 650504, China

<sup>3</sup>Hotchkiss Brain Institute, Department of Physiology and Pharmacology, Cumming School of Medicine, University of Calgary, Calgary, AB T2N 1N4, Canada

<sup>4</sup>Hotchkiss Brain Institute, Department of Cell Biology and Anatomy, Cumming School of Medicine, University of Calgary, Calgary, AB T2N 1N4, Canada

<sup>5</sup>Department of Chemistry, University of Calgary, Calgary, AB T2N 1N4, Canada

<sup>6</sup>Department of Physiology & Biophysics, Rush University Medical Center, Chicago, IL 60612, USA

<sup>7</sup>These authors contributed equally

<sup>8</sup>Lead Contact

\*Correspondence: [swchen@ucalgary.ca](mailto:swchen@ucalgary.ca)

<https://doi.org/10.1016/j.celrep.2020.108169>

## SUMMARY

Neuronal hyperactivity is an early primary dysfunction in Alzheimer's disease (AD) in humans and animal models, but effective neuronal hyperactivity-directed anti-AD therapeutic agents are lacking. Here we define a previously unknown mode of ryanodine receptor 2 (RyR2) control of neuronal hyperactivity and AD progression. We show that a single RyR2 point mutation, E4872Q, which reduces RyR2 open time, prevents hyperexcitability, hyperactivity, memory impairment, neuronal cell death, and dendritic spine loss in a severe early-onset AD mouse model (5x*FAD*). The RyR2-E4872Q mutation upregulates hippocampal CA1-pyramidal cell A-type  $K^+$  current, a well-known neuronal excitability control that is downregulated in AD. Pharmacologically limiting RyR2 open time with the *R*-carvedilol enantiomer (but not racemic carvedilol) prevents and rescues neuronal hyperactivity, memory impairment, and neuron loss even in late stages of AD. These AD-related deficits are prevented even with continued  $\beta$ -amyloid accumulation. Thus, limiting RyR2 open time may be a hyperactivity-directed, non- $\beta$ -amyloid-targeted anti-AD strategy.

## INTRODUCTION

Alzheimer's disease (AD) is the most common form of dementia and afflicts a rapidly growing population globally. Despite a substantial worldwide effort, there is currently no effective treatment for AD. Over the past several decades, AD research has largely targeted the amyloid cascade, which is thought to drive AD progression because of deposition of  $\beta$ -amyloid ( $A\beta$ ) plaques in the brain (Berridge, 2010; Hardy and Selkoe, 2002; Karran et al., 2011). Hence, the dominating therapeutic anti-AD strategy has been reducing  $A\beta$  depositions (Demattos et al., 2012; Kennedy et al., 2016; Sevigny et al., 2016). Unfortunately, all major  $A\beta$ -targeted clinical trials to date have been unsuccessful (Chakroborty and Stutzmann, 2014; Honig et al., 2018; Karran et al., 2011), highlighting the urgent need to develop new non- $A\beta$ -targeted AD therapy strategies.

Compelling evidence points to neuronal hyperactivity as an early primary neuronal dysfunction in human AD patients as

well as animal models of AD (Busche et al., 2008, 2012; Busche and Konnerth, 2015; Dickerson et al., 2005; Keskin et al., 2017; Lerdkrai et al., 2018; Nuriel et al., 2017; O'Brien et al., 2010; Stargardt et al., 2015; Zott et al., 2019). Neuronal hyperactivity can be induced *in vivo* by acute treatment with exogenous soluble  $A\beta$  (Busche et al., 2012; Keskin et al., 2017; Zott et al., 2019). Importantly, neuronal hyperactivity itself can trigger release of endogenous soluble  $A\beta$  (Cirrito et al., 2005; Kamenetz et al., 2003; Yamamoto et al., 2015). Thus, soluble  $A\beta$  not only makes active neurons more active (hyperactive) but also triggers soluble  $A\beta$  release, which, in turn, further promotes hyperactivity. This vicious cycle is believed to drive  $A\beta$  accumulation, neuronal hyperactivity, circuit dysfunction, and AD progression (Busche and Konnerth, 2015, 2016; Stargardt et al., 2015; Zott et al., 2019). Targeting  $A\beta$  has proven to be insufficient to stop this vicious cycle in humans. An alternative, logical approach is to target neuronal hyperactivity (another component of the vicious cycle).

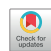

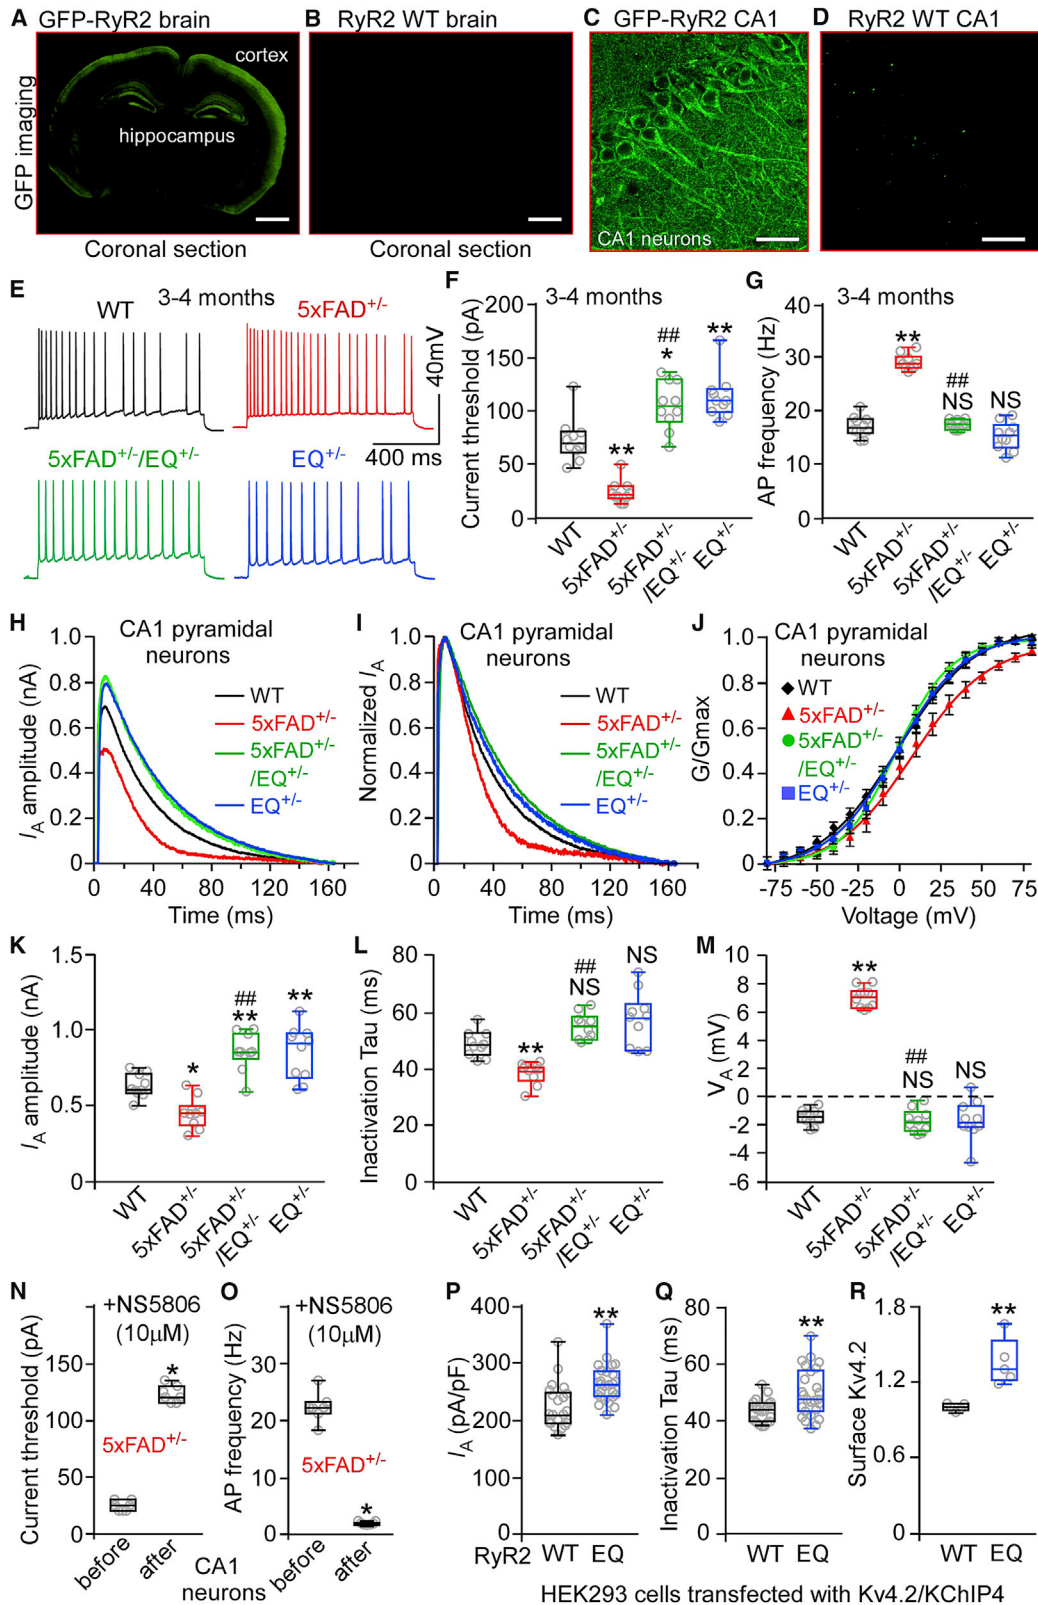

(legend on next page)

Ryanodine receptor 2 (RyR2) is an intracellular  $\text{Ca}^{2+}$  release channel. RyR2 is predominantly expressed in the heart and brain, especially in the hippocampus and cortex (Bers, 2002; Furuichi et al., 1994; Giannini et al., 1995; Murayama and Ogawa, 1996). RyR2-mediated  $\text{Ca}^{2+}$  release plays an important role in regulating membrane excitability of various cells (Alkon et al., 1998; Bogdanov et al., 2001; Mandikian et al., 2014; Nelson et al., 1995). Enhanced RyR2 function can cause cardiac arrhythmias and sudden death and has also been implicated in AD pathogenesis (Bruno et al., 2012; Chakraborty et al., 2009; Kelliher et al., 1999; Lacampagne et al., 2017; Oulès et al., 2012; Priori and Chen, 2011; SanMartin et al., 2017; Smith et al., 2005). Thus, targeting RyR2 may be a means to control membrane excitability and AD-related neuronal hyperactivity. However, given the multiple essential physiological roles of RyR2, dramatically blocking RyR2 function or expression would be detrimental (Broun et al., 2012; Liu et al., 2014; Takeshima et al., 1998). The challenge is how to suppress overactive RyR2 without detrimental effects.

We have shown that the E4872 residue is important for RyR2 channel gating. Mutating this residue (E4872Q) substantially shortens RyR2 open time without altering the channel's ion conduction (Chen et al., 2014). Importantly, limiting RyR2 open time completely protects against ventricular tachyarrhythmias without detrimental effects on the heart (Chen et al., 2014). This raises the intriguing possibility that the same RyR2 suppression may also protect against AD, which is associated with enhanced RyR2 function. To test this possibility, we crossed heterozygous RyR2-E4872Q<sup>+/-</sup> mutant mice with the robust early- and rapid-onset AD mouse model 5xFAD (Oakley et al., 2006). We showed that genetically limiting RyR2 open time prevented intrinsic membrane hyperexcitability, neuronal hyperactivity, long-term potentiation (LTP) deficits, learning and memory impairments, neuronal cell death, and dendritic spine loss in 5xFAD mice. Further, we found that limiting RyR2 open time upregulates the A-type  $\text{K}^+$  current but not the commonly known

RyR-regulated afterhyperpolarization current ( $I_{\text{AHP}}$ ) of hippocampal CA1 neurons. Moreover, we discovered that the RyR2 open time-limiting *R*-carvedilol enantiomer (Zhang et al., 2015; Zhou et al., 2011), but not a racemic carvedilol mixture, prevented and rescued neuronal hyperactivity, learning and memory impairments, and neuron loss in 5xFAD mice. Importantly, these AD-associated deficits were prevented even in late stages of AD with extensive  $\text{A}\beta$  accumulation. Therefore, limiting RyR2 open time may be a hyperactivity-directed strategy for combating AD irrespective of  $\text{A}\beta$  accumulation.

## RESULTS

### Limiting RyR2 Open Time Prevents AD-Associated Intrinsic Hyperexcitability of Hippocampal CA1 Pyramidal Neurons

Intrinsic hyperexcitability of hippocampal CA1 pyramidal neurons has been implicated in AD pathogenesis in animal models (Brown et al., 2011; Kerrigan et al., 2014; Scala et al., 2015; Šišková et al., 2014). Thus, it is of interest to determine whether limiting RyR2 open time affects AD-associated intrinsic hyperexcitability of CA1 cells. To this end, we crossbred heterozygous 5xFAD<sup>+/-</sup> mice (Oakley et al., 2006) with heterozygous RyR2 E4872Q<sup>+/-</sup> mutant mice (Chen et al., 2014). This breeding generated four genotypes: 5xFAD<sup>+/-</sup>, 5xFAD<sup>+/-</sup>/E4872Q<sup>+/-</sup> (5xFAD<sup>+/-</sup>/EQ<sup>+/-</sup>), E4872Q<sup>+/-</sup> (EQ<sup>+/-</sup>), and wild type (WT). Of note, RyR2 is predominantly expressed in the hippocampus and cortex as well as the soma and dendrites of CA1 pyramidal neurons, as revealed by fluorescence imaging of GFP-tagged RyR2 brain sections (Hiess et al., 2015; Figures 1A–1D).

We performed whole-cell patch-clamp recordings of 3- to 4-month-old CA1 pyramidal neurons in brain slices to assess intrinsic excitability. In 5xFAD<sup>+/-</sup> CA1 neurons, the threshold current for inducing action potential (AP) firing was markedly reduced and the frequency of current-induced AP firing was increased compared with WT cells (Figures 1E–1G). Notably,

### Figure 1. The RyR2 E4872Q<sup>+/-</sup> Mutation Decreases Neuronal Excitability and Upregulates A-type $\text{K}^+$ Current of CA1 Neurons

(A–D) Images of GFP-tagged RyR2 (A and C) and RyR2-WT (GFP-negative; B and D) mouse brain sections.

(E) Traces of action potential (AP) firing.

(F) Current thresholds for AP firing in WT (10 mice, 30 neurons), 5xFAD<sup>+/-</sup> (10 mice, 30 neurons), 5xFAD<sup>+/-</sup>/EQ<sup>+/-</sup> (10 mice, 30 neurons), and EQ<sup>+/-</sup> (10 mice, 30 neurons) CA1 neurons.

(G) Current injection-triggered AP firing frequency in WT (10 mice, 30 neurons), 5xFAD<sup>+/-</sup> (10 mice, 30 neurons), 5xFAD<sup>+/-</sup>/EQ<sup>+/-</sup> (10 mice, 30 neurons), and EQ<sup>+/-</sup> (10 mice, 30 neurons) CA1 neurons.

(H) Traces of A-type  $\text{K}^+$  current ( $I_{\text{A}}$ ) from 3- to 4-month-old WT, 5xFAD<sup>+/-</sup>, 5xFAD<sup>+/-</sup>/EQ<sup>+/-</sup>, and EQ<sup>+/-</sup> CA1 neurons.

(I) Normalized  $I_{\text{A}}$  traces.

(J) Steady-state activation curves of  $I_{\text{A}}$ .

(K)  $I_{\text{A}}$  amplitude in 3- to 4-month-old WT (10 mice, 30 neurons), 5xFAD<sup>+/-</sup> (10 mice, 30 neurons), 5xFAD/EQ<sup>+/-</sup> (10 mice, 30 neurons), and EQ<sup>+/-</sup> (10 mice, 30 neurons) CA1 neurons.

(L)  $I_{\text{A}}$  inactivation kinetics (Tau) from the same number of neurons as in (K).

(M) The midpoints of voltage-dependent activation of  $I_{\text{A}}$  ( $V_{\text{A}}$ ) for WT (10 mice, 30 neurons), 5xFAD<sup>+/-</sup> (10 mice, 30 neurons), 5xFAD<sup>+/-</sup>/EQ<sup>+/-</sup> (10 mice, 30 neurons), and EQ<sup>+/-</sup> (10 mice, 30 neurons) CA1 neurons.

(N and O) Current threshold for AP firing (N) and current injection-triggered AP firing frequency (O) without or with the Kv4 channel agonist NS5806 (10  $\mu\text{M}$ ) in 5xFAD<sup>+/-</sup> CA1 neurons (7 mice, 14 neurons).

(P and Q) Whole-cell  $I_{\text{A}}$  (P) and inactivation time constant Tau (Q) in Kv4.2/KChIP4-transfected HEK293 cells expressing RyR2 WT (n = 21) or the RyR2 E4872Q<sup>+/-</sup> mutation (n = 26).

(R) Biotin-labeled surface Kv4.2 in Kv4.2/KChIP4-transfected HEK293 cells expressing RyR2 WT or the RyR2 E4872Q<sup>+/-</sup> mutation.

Scale bars, 2 mm in (A) and (B) and 10  $\mu\text{m}$  in (C) and (D). Data shown are the median and range (Kruskal-Wallis test with Dunn-Bonferroni post hoc test, Wilcoxon matched-pairs signed rank test, and Mann-Whitney *U* test; \**p* < 0.05, \*\**p* < 0.01 versus WT, ##*p* < 0.01; 5xFAD<sup>+/-</sup>/EQ<sup>+/-</sup> versus 5xFAD<sup>+/-</sup>; NS, not significant). See also Figure S1.

the E4872Q<sup>+/-</sup> mutation substantially increased the threshold current for AP firing and prevented the increased frequency of AP firing in 5xFAD<sup>+/-</sup>/EQ<sup>+/-</sup> and EQ<sup>+/-</sup> CA1 pyramidal neurons (Figures 1E–1G). Thus, limiting RyR2 open time markedly constrains the intrinsic excitability of 5xFAD<sup>+/-</sup>/EQ<sup>+/-</sup> and EQ<sup>+/-</sup> CA1 pyramidal neurons.

### Limiting RyR2 Open Time Upregulates the A-type K<sup>+</sup> Current of CA1 Pyramidal Neurons

We next measured the  $I_{AHP}$  because  $I_{AHP}$  influences intrinsic excitability (Bodhinathan et al., 2010; van de Vrede et al., 2007). In 5xFAD<sup>+/-</sup> CA1 pyramidal neurons, the medium and slow components of  $I_{AHP}$  were substantially reduced compared with the WT (Figures S1A–S1C; Figures 1E–1G). There was no significant difference in  $I_{AHP}$  between 5xFAD<sup>+/-</sup> and 5xFAD<sup>+/-</sup>/EQ<sup>+/-</sup> and between WT and EQ<sup>+/-</sup> neurons (Figures S1A–S1C). Thus, the E4872Q<sup>+/-</sup> mutation did not significantly affect  $I_{AHP}$  of 5xFAD<sup>+/-</sup> or WT CA1 pyramidal neurons even though it strongly inhibited intrinsic excitability. Thus, the action of E4872Q<sup>+/-</sup> in intrinsic excitability is unlikely to be mediated by  $I_{AHP}$ .

Hippocampal A-type K<sup>+</sup> current downregulation has been implicated in AD-related neuronal hyperactivity (Chen, 2005; Good et al., 1996; Hall et al., 2015; Scala et al., 2015). This led us to assess whether the E4872Q<sup>+/-</sup> mutation affects the A-type K<sup>+</sup> current. We found that the A-type K<sup>+</sup> current was decreased, the decay time ( $\tau$ ) was shortened, and the midpoint for voltage-dependent activation ( $V_A$ ) was increased, but the midpoint for voltage-dependent inactivation ( $V_H$ ) was unchanged in 3- to 4-month-old 5xFAD<sup>+/-</sup> CA1 pyramidal neurons compared with the WT (Figures 1H–1M; Figures S1E and S1F), consistent with previous reports (Chen, 2005; Good et al., 1996; Hall et al., 2015; Scala et al., 2015). The E4872Q<sup>+/-</sup> mutation markedly upregulated the A-type K<sup>+</sup> current of 5xFAD<sup>+/-</sup>/EQ<sup>+/-</sup> and EQ<sup>+/-</sup> hippocampal CA1 neurons compared with the WT. Specifically, the E4872Q<sup>+/-</sup> mutation increased the A-type K<sup>+</sup> current and decay time without altering the  $V_A$  or  $V_H$  (Figures 1H–1M; Figures S1E and S1F). The A-type K<sup>+</sup> current agonist NS5806 (10  $\mu$ M), dramatically increased the threshold current for inducing AP firing and decreased the frequency of AP firing in 5xFAD<sup>+/-</sup> CA1 pyramidal neurons (Figures 1N and 1O; Figure S1D). Thus, limiting RyR2 open time upregulates the A-type K<sup>+</sup> current of CA1 pyramidal neurons.

Hippocampal CA1 neurons express the Kv4.2/KChIP4 channel complex, which is thought to contribute significantly to the A-type K<sup>+</sup> current (Lin et al., 2010; Rhodes et al., 2004; Serôdio and Rudy, 1998; Xiong et al., 2004). KChIP4 is a Ca<sup>2+</sup> binding protein known to modulate the activity of Kv4.2 (Morohashi et al., 2002). Thus, RyR2-mediated Ca<sup>2+</sup> release may regulate the A-type K<sup>+</sup> current by modulating Kv4.2 via KChIP4. To test this, we assessed the action of RyR2-E4872Q<sup>+/-</sup> on the A-type K<sup>+</sup> current in Kv4.2/KChIP4-transfected HEK293 cells. The E4872Q<sup>+/-</sup> mutation increased Kv4.2-mediated current and decay time without altering its voltage-dependent activation or inactivation (Figures 1P and 1Q; Figures S1G and S1H). This action of E4872Q<sup>+/-</sup> on Kv4.2-mediated current depends on KChIP4 because E4872Q<sup>+/-</sup> had no effect on Kv4.2-mediated current in HEK293 cells transfected with Kv4.2 alone (i.e., without KChIP4) (Figures S1I–S1L). The trafficking and surface

expression of Kv4.2 are regulated by neuronal activity and Ca<sup>2+</sup> influx (Kim et al., 2007a). RyR2-mediated Ca<sup>2+</sup> release may also modulate Kv4.2 trafficking. Indeed, surface labeling experiments revealed that the E4872Q<sup>+/-</sup> mutation increased the surface expression of Kv4.2 in HEK293 cells (Figure 1R; Figure S1M). Caffeine (an agonist of RyR2) decreased Kv4.2-mediated current and decay time without altering its voltage-dependent activation or inactivation (Figures S1N–S1U). Thus, pharmacological manipulation of RyR2 also affects the A-type K<sup>+</sup> current.

Intracellular Ca<sup>2+</sup> release through RyRs has been shown to modulate presynaptic activity (Chakroborty et al., 2019, 2012b; Le Magueresse and Cherubini, 2007). Thus, we determined whether limiting RyR2 open time affects the spontaneous excitatory postsynaptic current (sEPSC) of CA1 pyramidal neurons. There were no significant differences in the amplitude or the inter-event intervals among WT, 5xFAD<sup>+/-</sup>, 5xFAD<sup>+/-</sup>/EQ<sup>+/-</sup>, and EQ<sup>+/-</sup> CA1 neurons (Figures S2A–S2C). This suggests that the action of limiting RyR2 open time in membrane excitability is unlikely to be mediated by changes to synaptic efficacy. Thus, genetically limiting RyR2 open time upregulates the A-type K<sup>+</sup> current and constrains the intrinsic excitability of CA1 pyramidal neurons.

### Limiting RyR2 Open Time Prevents AD-Associated Neuronal Hyperactivity of CA1 Pyramidal Neurons *Ex Vivo* and *In Vivo*

To determine whether limiting RyR2 open time can also prevent AD-associated neuronal hyperactivity of CA1 pyramidal neurons, we measured spontaneous neuronal activity (spontaneous AP firing) of CA1 pyramidal neurons in brain slices. Similar to previous reports (Leão et al., 2012; Šišková et al., 2014), the fraction of neurons displaying spontaneous AP firing and the frequency of spontaneous AP firing were markedly increased in 5xFAD<sup>+/-</sup> CA1 pyramidal neurons compared with the WT (Figures S2D–S2F). Notably, the E4872Q<sup>+/-</sup> mutation prevented the enhancement of spontaneous AP firing of 5xFAD<sup>+/-</sup>/EQ<sup>+/-</sup> CA1 pyramidal neurons *ex vivo* in brain slices (Figures S2D–S2F).

To assess whether limiting RyR2 open time can suppress AD-associated neuronal hyperactivity *in vivo*, we crossed double-heterozygous 5xFAD<sup>+/-</sup>/E4872Q<sup>+/-</sup> mice with heterozygous *Thy-1* GCaMP6f<sup>+/-</sup> transgenic mice to introduce the GCaMP6f<sup>+/-</sup> transgene into each of the four genotypes. GCaMP6f is a fast, ultrasensitive Ca<sup>2+</sup>-sensing protein capable of detecting individual APs in neurons with high reliability (Chen et al., 2013; Dana et al., 2014; Peron et al., 2015). We performed *in vivo* two-photon imaging of GCaMP6f-expressing CA1 pyramidal neurons to monitor spontaneous Ca<sup>2+</sup> transients, which are widely used to assess spontaneous neuronal activity of cell populations (Busche et al., 2008, 2012; Chen et al., 2013; Dana et al., 2014; Kerr et al., 2005; Peron et al., 2015; Sato et al., 2007; Zott et al., 2019). We found that anesthetized 5xFAD<sup>+/-</sup> mice 5–6 months old exhibited neuronal hyperactivity, as evidenced by a significant increase in the fraction of hyperactive neurons (as defined by Busche et al., 2012) and in the mean frequency of spontaneous Ca<sup>2+</sup> transients and a significant decrease in the fraction of normal neurons compared with the WT (Figures 2A, 2B, 2E, 2F, 2I, 2J, 2N, 2P, and 2Q). There is no significant difference in the fraction of silent neurons between

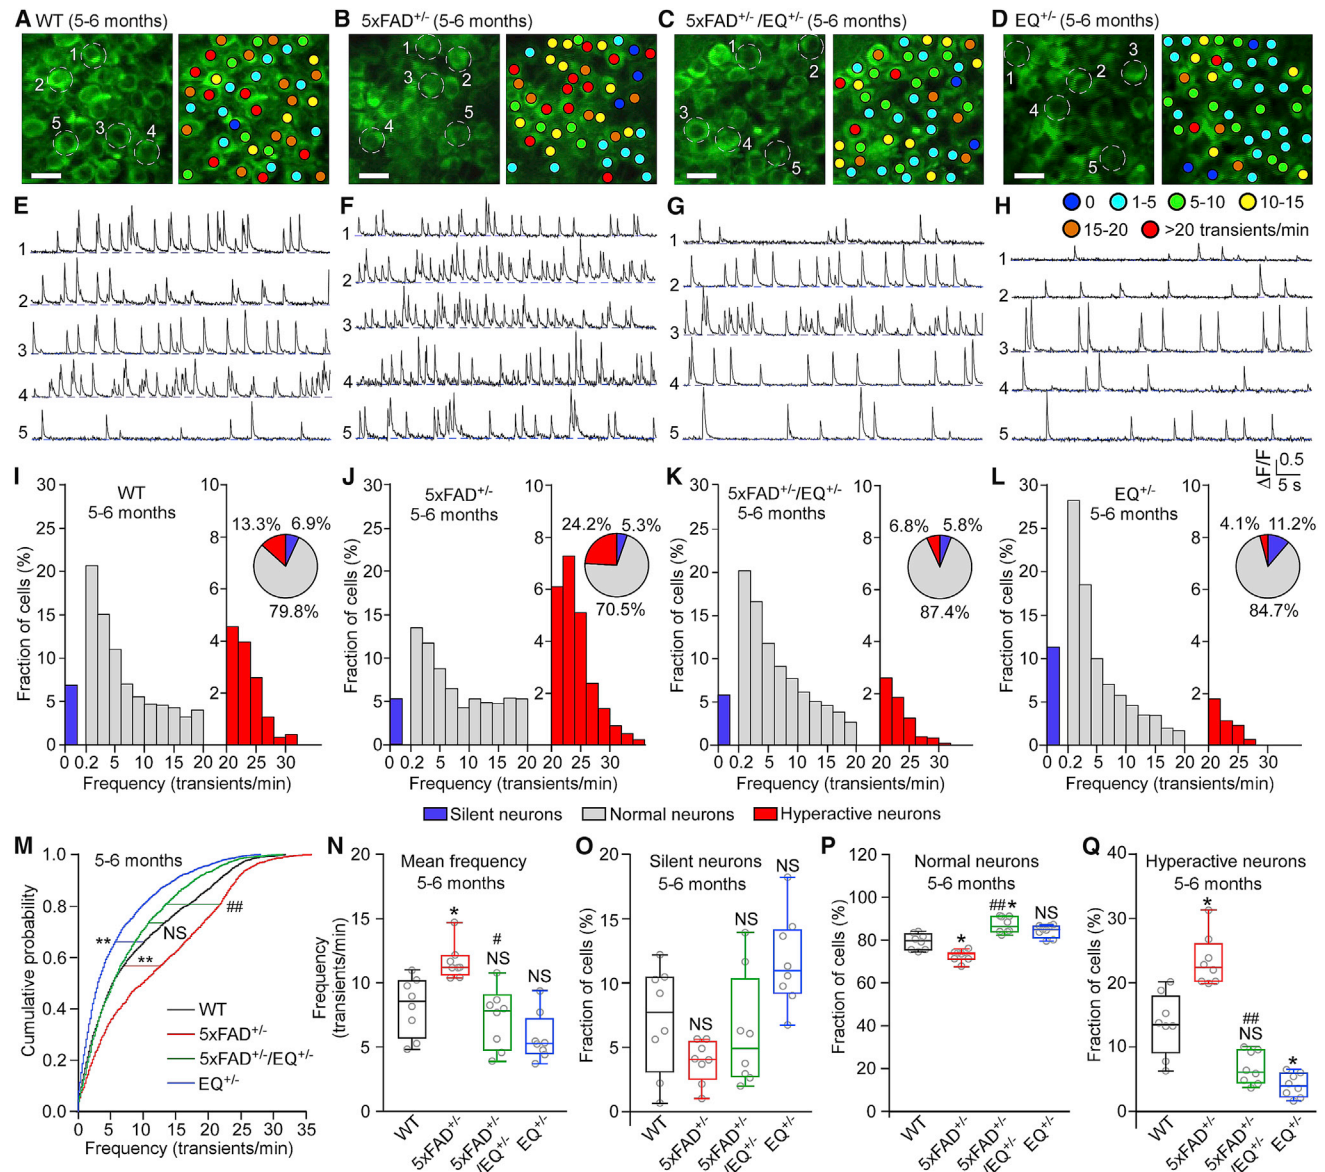

**Figure 2. RyR2-E4872Q<sup>+/-</sup> Prevents Neuronal Hyperactivity of 5x FAD<sup>+/-</sup> Hippocampal CA1 Neurons In Vivo**

(A–D) Two-photon Ca<sup>2+</sup> images of the hippocampal CA1 region of 5- to 6-month-old WT (A), 5x FAD<sup>+/-</sup> (B), 5x FAD<sup>+/-</sup>/EQ<sup>+/-</sup> (C), and EQ<sup>+/-</sup> (D) mice *in vivo*. Colored dots indicate the number of Ca<sup>2+</sup> transients per minute.

(E–H) Ca<sup>2+</sup> traces of the five neurons circled in (A)–(D), respectively.

(I–L) Histograms showing the frequency distribution of Ca<sup>2+</sup> transients in (I) WT (8 mice, 2,375 cells), (J) 5x FAD<sup>+/-</sup> (8 mice, 1,708 cells), (K) 5x FAD<sup>+/-</sup>/EQ<sup>+/-</sup> (8 mice, 2,283 cells), and (L) EQ<sup>+/-</sup> (8 mice, 2,392 cells). Pie charts show the relative proportions of silent, normal, and hyperactive neurons as defined previously (Busche, 2018; Busche et al., 2008, 2012).

(M) Cumulative probability functions showing frequency distributions of spontaneous Ca<sup>2+</sup> transients in the CA1 region of WT (black), 5x FAD<sup>+/-</sup> (red), 5x FAD<sup>+/-</sup>/EQ<sup>+/-</sup> (green), and EQ<sup>+/-</sup> (blue) mice (Kruskal-Wallis test with Dunn’s multiple comparisons test).

(N) Mean Ca<sup>2+</sup> transient frequency in the WT, 5x FAD<sup>+/-</sup>, 5x FAD<sup>+/-</sup>/EQ<sup>+/-</sup>, and EQ<sup>+/-</sup> CA1 region.

(O–Q) Percentage of silent (O), normal (P), and hyperactive (Q) cells in the WT, 5x FAD<sup>+/-</sup>, 5x FAD<sup>+/-</sup>/EQ<sup>+/-</sup>, and EQ<sup>+/-</sup> CA1 region.

Scale bars: 10 μm. Data shown are the median and range (Kruskal-Wallis test with Dunn-Bonferroni post hoc test; \*p < 0.05, \*\*p < 0.01 versus WT, #p < 0.05, ##p < 0.01; 5x FAD<sup>+/-</sup>/EQ<sup>+/-</sup> versus 5x FAD<sup>+/-</sup>). See also Figures S2 and S3.

WT and 5x FAD<sup>+/-</sup> mice (Figure 2O). The frequency distributions of hyperactive neurons in WT and 5x FAD<sup>+/-</sup> mice are similar (Figures 2I and 2J). This is consistent with previous reports (Busche et al., 2012, 2019; Lerdkrai et al., 2018). Cumulative probability

analysis also revealed that 5x FAD<sup>+/-</sup> mice have markedly increased overall spontaneous neuronal activity compared with the WT (p < 0.0001) (Figure 2M). Notably, the RyR2 E4872Q<sup>+/-</sup> mutation markedly decreased the fraction of hyperactive

neurons and the mean frequency of spontaneous  $\text{Ca}^{2+}$  transients, increased the fraction of normal neurons, and reduced the overall spontaneous neuronal activity (as revealed by the cumulative probability analysis) in  $5x\text{FAD}^{+/-}/\text{EQ}^{+/-}$  and  $\text{EQ}^{+/-}$  mice compared with  $5x\text{FAD}^{+/-}$  and WT mice, respectively (Figure 2). On the other hand, consistent with a previous study (Lerdkrai et al., 2018), there is no significant difference in the amplitude of spontaneous  $\text{Ca}^{2+}$  transients among different genotypes (Figure S2G). Neuronal hyperactivity already occurred in 3- to 4-month-old  $5x\text{FAD}^{+/-}$  mice, as evidenced by a significant increase in the fraction of hyperactive neurons, the mean frequency of spontaneous  $\text{Ca}^{2+}$  transients, and the overall neuronal activity compared with the WT at the same age (Figure S3). Similarly, the RyR2 E4872Q<sup>+/-</sup> mutation decreased the fraction of hyperactive neurons and the mean frequency of spontaneous  $\text{Ca}^{2+}$  transients and reduced the overall spontaneous neuronal activity in 3- to 4-month-old  $5x\text{FAD}^{+/-}/\text{EQ}^{+/-}$  mice compared with  $5x\text{FAD}^{+/-}$  mice (Figure S3). Overall, this shows that limiting RyR2 open time in  $5x\text{FAD}^{+/-}$  mice prevents AD-associated neuronal hyperactivity of CA1 pyramidal neurons *ex vivo* and *in vivo*.

#### Limiting RyR2 Open Time Prevents AD-Associated Enhanced RyR2 Function of CA1 Pyramidal Neurons

We carried out 2-photon  $\text{Ca}^{2+}$  imaging of CA1 pyramidal neurons in brain slices prepared from GCaMP6f-expressing WT,  $5x\text{FAD}^{+/-}$ ,  $5x\text{FAD}^{+/-}/\text{EQ}^{+/-}$ , and  $\text{EQ}^{+/-}$  mice. Consistent with other AD mouse models (Bruno et al., 2012; Chakroborty et al., 2009, 2012a), caffeine-induced  $\text{Ca}^{2+}$  release in  $5x\text{FAD}^{+/-}$  CA1 pyramidal neurons was markedly enhanced compared with WT cells (Figure S2H). On the other hand, caffeine-induced  $\text{Ca}^{2+}$  release in  $5x\text{FAD}^{+/-}/\text{EQ}^{+/-}$  or  $\text{EQ}^{+/-}$  CA1 pyramidal neurons was unchanged or reduced (respectively) compared with WT cells (Figure S2H). These data indicate that RyR2 function is markedly enhanced in  $5x\text{FAD}^{+/-}$  CA1 pyramidal neurons and that this aberrant RyR2 activation is prevented by the RyR2-E4872Q<sup>+/-</sup> mutation.

We also assessed the effect of presenilin 1 (PS1) WT and the PS1 mutations M146L and L286V on RyR2 function by measuring the propensity for spontaneous  $\text{Ca}^{2+}$  release in RyR2-expressing HEK293 cells transfected with or without PS1 WT or mutants (Chen et al., 2014; Jiang et al., 2004, 2005). Consistent with early studies (Chan et al., 2000; Rybalchenko et al., 2008; Wu et al., 2013), we found that PS1 WT and mutations markedly enhanced RyR2-mediated spontaneous  $\text{Ca}^{2+}$  release (Figure S2J). The E4872Q<sup>+/-</sup> mutation diminished this spontaneous  $\text{Ca}^{2+}$  release in all RyR2-expressing cells (Figure S2K). Thus, limiting RyR2 open time prevents AD-induced aberrant activation of RyR2-mediated  $\text{Ca}^{2+}$  release.

#### Limiting RyR2 Open Time Prevents AD-Associated Memory Loss and Hippocampal LTP Deficit

We performed Morris water maze (MWM) and novel object recognition (NOR) tests to assess whether the RyR2 E4872Q<sup>+/-</sup> mutation prevents the characteristic memory loss in  $5x\text{FAD}^{+/-}$  mice.  $5x\text{FAD}$  mice (5–6 months old) have significant impairment in learning and memory (Figures 3A–3C), as evidenced by a significantly increased latency to target, decreased

time spent in the target zone in the MWM, and reduced discrimination index in the NOR test compared with the WT. Remarkably, the E4872Q<sup>+/-</sup> mutation prevented these deficits in  $5x\text{FAD}^{+/-}/\text{EQ}^{+/-}$  mice. There were no significant differences in MWM or NOR tests between 5- to 6-month-old  $5x\text{FAD}^{+/-}/\text{EQ}^{+/-}$  and WT mice or between  $\text{EQ}^{+/-}$  and WT mice (Figures 3A–3C). Similar MWM and NOR test outcomes were also observed in 3- to 4-month-old mice (Figures S4A–S4C). To determine whether the E4872Q<sup>+/-</sup> mutation could prevent learning and memory deficits in aged  $5x\text{FAD}^{+/-}$  mice, we performed Barnes maze (BM) and MWM tests on 10- to 15-month-old mice. As expected, the older  $5x\text{FAD}^{+/-}$  mice had severe learning and memory impairments (Figures 3D and 3E; Figures S4D–S4F). Importantly, the E4872Q<sup>+/-</sup> mutation prevented these learning and memory impairments in  $5x\text{FAD}^{+/-}/\text{EQ}^{+/-}$  mice even in this late stage of AD.

The effect of the E4872Q<sup>+/-</sup> mutation on learning and memory was also assessed at the cellular level by measuring hippocampal LTP in brain slices. Consistent with our behavioral studies,  $5x\text{FAD}^{+/-}$  mice at 3–4, 5–6, and 10–15 months of age showed little or no hippocampal LTP (Figures 3F–3I; Figure S4G and S4H). The E4872Q<sup>+/-</sup> mutation prevented these hippocampal LTP impairments, as evidenced by the similar levels of hippocampal LTP in WT,  $5x\text{FAD}^{+/-}/\text{EQ}^{+/-}$ , and  $\text{EQ}^{+/-}$  mice (Figures 3F–3I; Figures S4G and S4H).  $5x\text{FAD}^{+/-}$  mice also displayed slightly reduced hippocampal basal synaptic transmission, as revealed by the reduced field excitatory postsynaptic potential (fEPSP) slope in relation to the current input (Figures S5A–S5F), similar to a previous report (Waring et al., 2012). Thus, limiting RyR2 open time prevents hippocampal LTP impairment and memory loss in  $5x\text{FAD}^{+/-}$  mice.

#### R-carvedilol Prevents and Rescues Neuronal Hyperactivity and Memory Loss in $5x\text{FAD}^{+/-}$ Mice

We showed previously that R-carvedilol shortens RyR2 open time (Zhang et al., 2015; Zhou et al., 2011). Given the effect of the E4872Q<sup>+/-</sup> mutation on hippocampal neuronal activity, this agent may provide a pharmacological means to limit RyR2 open time, neuronal hyperactivity, and AD progression. To test this, we pretreated 2- to 3-month-old  $5x\text{FAD}^{+/-}$  mice (i.e., before the occurrence of AD pathology) or 3- to 4-month-old  $5x\text{FAD}^{+/-}$  mice (i.e., after the occurrence of AD pathology) (Oakley et al., 2006) with R-carvedilol (3.2 mg/kg/day) or its vehicle control (DMSO) for 1 month. R-carvedilol pretreatment prevented and rescued neuronal hyperactivity of  $5x\text{FAD}^{+/-}$  hippocampal CA1 neurons *in vivo*, as evidenced by the observation that the fraction of hyperactive neurons, the mean frequency of spontaneous  $\text{Ca}^{2+}$  transients, and overall spontaneous neuronal activity were significantly lower in R-carvedilol-pretreated  $5x\text{FAD}^{+/-}$  mice than in vehicle-pretreated mice at both ages (Figure 4) but similar to those in the WT (Figure S3). Caffeine-induced  $\text{Ca}^{2+}$  release was also markedly reduced in R-carvedilol-pretreated  $5x\text{FAD}^{+/-}$  CA1 pyramidal neurons compared with DMSO-treated (control) cells in brain slices (Figure S2I). Thus, R-carvedilol, like the RyR2-E4872Q<sup>+/-</sup> mutation, can prevent AD-induced aberrant activation of RyR2-mediated  $\text{Ca}^{2+}$  release.

R-carvedilol pretreatment of 2- to 3-month-old  $5x\text{FAD}^{+/-}$  mice (before AD symptoms) also prevented memory loss and LTP

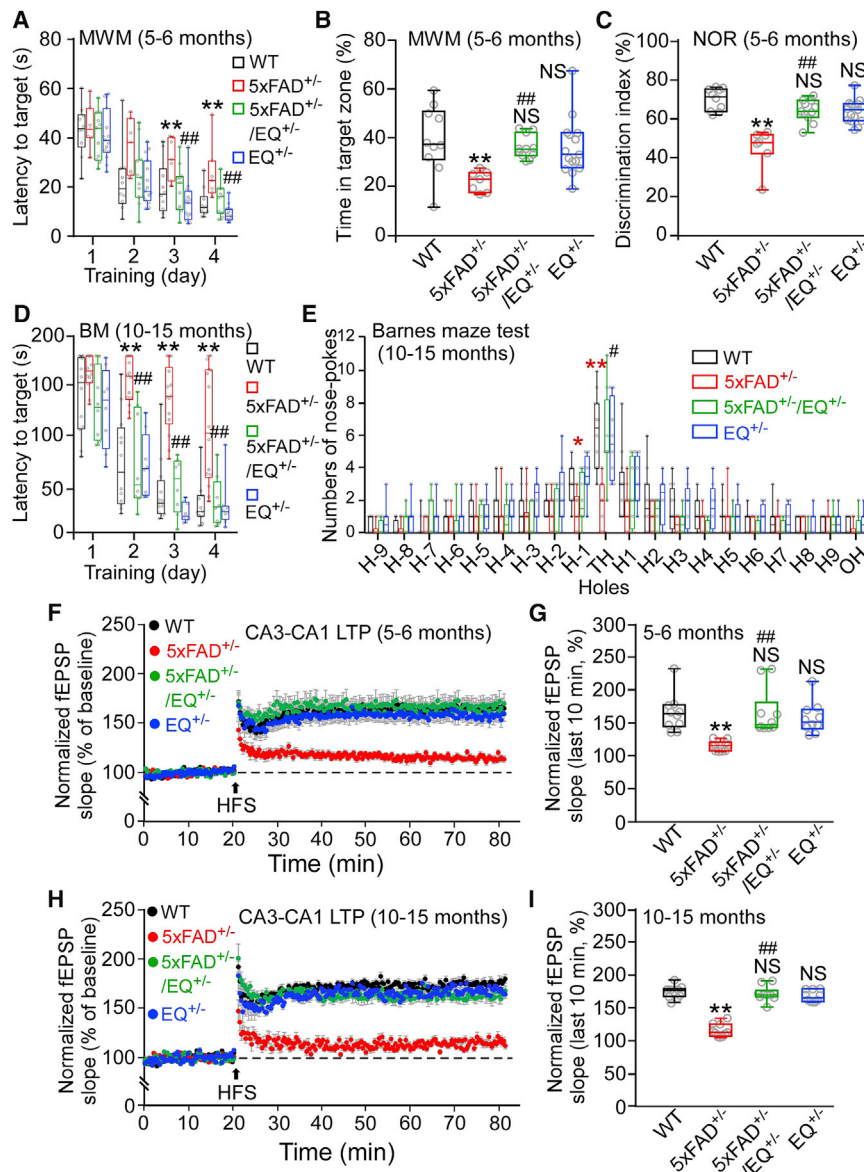

**Figure 3. The E4872Q<sup>+/-</sup> Mutation Prevents Memory Loss and LTP Impairment of 5xFAD<sup>+/-</sup> Mice**

(A) The latency to reach the target platform of 5- to 6-month-old WT (n = 10), 5xFAD<sup>+/-</sup> (n = 7), 5xFAD<sup>+/-</sup>/EQ<sup>+/-</sup> (n = 11), and EQ<sup>+/-</sup> (n = 15) mice in the Morris water maze (MWM) test. (B) The time spent in the target quadrant. (C) The percentage of time spent on the novel object in the novel object recognition (NOR) test in 5- to 6-month-old WT (n = 10), 5xFAD<sup>+/-</sup> (n = 7), 5xFAD<sup>+/-</sup>/EQ<sup>+/-</sup> (n = 11), and EQ<sup>+/-</sup> (n = 15) mice. (D) The latency to reach the target hole of 10- to 15-month-old WT (n = 12), 5xFAD<sup>+/-</sup> (n = 14), 5xFAD<sup>+/-</sup>/EQ<sup>+/-</sup> (n = 8), and EQ<sup>+/-</sup> (n = 8) mice in the Barnes maze (BM) test. (E) The number of nose pokes to each hole on the BM test platform (\*\*5xFAD versus WT). (F) Effect of 100-Hz high-frequency stimulation (HFS) on the mean Schaffer collateral-evoked fEPSP slope in hippocampal slices from 5- to 6-month-old WT (10 mice, 20 slices), 5xFAD<sup>+/-</sup> (10 mice, 20 slices), 5xFAD<sup>+/-</sup>/EQ<sup>+/-</sup> (10 mice, 20 slices), and EQ<sup>+/-</sup> (10 mice, 20 slices) mice. (G) The averaged normalized fEPSP slope. (H) Effect of HFS on the fEPSP slope of 10- to 15-month-old WT (10 mice, 20 slices), 5xFAD<sup>+/-</sup> (10 mice, 20 slices), 5xFAD<sup>+/-</sup>/EQ<sup>+/-</sup> (10 mice, 20 slices), and EQ<sup>+/-</sup> (10 mice, 20 slices) mice. (I) The averaged normalized fEPSP slope. Data shown are the median and range (Kruskal-Wallis test with Dunn-Bonferroni post hoc test; \*p < 0.05, \*\*p < 0.01 versus WT, #p < 0.05, ##p < 0.01; 5xFAD<sup>+/-</sup>/EQ<sup>+/-</sup> versus 5xFAD<sup>+/-</sup>). See also Figures S4 and S5.

**Limiting RyR2 Open Time Does Not Affect A $\beta$  Accumulation but Protects against Neuronal Cell Death and Dendritic Spine Loss**

We performed immunohistochemical staining and immunoblotting analyses to assess the effect of the RyR2-E4872Q<sup>+/-</sup> mutation on A $\beta$  accumulation. There was no significant difference in the

impairments (Figures 5A–5E), and *R*-carvedilol pretreatment of 3- to 4-month-old 5xFAD<sup>+/-</sup> mice (after AD symptoms) rescued these defects (Figures 5F–5J). To further assess whether *R*-carvedilol pretreatment is still effective in late stages of AD, we tested the drug on 6- to 7- and 10- to 12-month-old 5xFAD<sup>+/-</sup> mice. *R*-carvedilol pretreatment rescued memory deficits even in 6- to 7- and 10- to 12-month-old 5xFAD<sup>+/-</sup> mice (i.e., late stages of AD) (Figures S6A–S6H). The reduced basal synaptic transmission in 5xFAD<sup>+/-</sup> hippocampal brain slices was also restored by *R*-carvedilol pretreatment (Figures S5G–S5L). We also tested the clinically used carvedilol racemic mixture (3.2 mg/kg/day). This carvedilol mixture did not prevent learning and memory deficits or LTP impairment in 3- to 4-month-old 5xFAD<sup>+/-</sup> mice (Figures S5M, S5N, and S6I–S6M). Thus, *R*-carvedilol, but not the carvedilol racemic mixture, may be a promising hyperactivity-directed anti-AD agent.

number or the area of A $\beta$  plaques detected in the hippocampus of 10- to 15-month-old 5xFAD<sup>+/-</sup> and 5xFAD<sup>+/-</sup>/EQ<sup>+/-</sup> mice (Figures 6A–6C). Immunoblot analyses also showed no significant difference in total A $\beta$  or A $\beta$  (1–42) levels in 10- to 15-month-old 5xFAD<sup>+/-</sup> and 5xFAD<sup>+/-</sup>/EQ<sup>+/-</sup> mouse brain tissue homogenates (Figures 6D–6F). No A $\beta$  plaques were detected in WT or EQ<sup>+/-</sup> brain slices, and no specific A $\beta$  signals were detected in WT or EQ<sup>+/-</sup> brain tissue homogenates. Similar results were also observed in 5- to 6-month-old mice (Figures S7A–S7F). Thus, limiting RyR2 open time does not significantly alter A $\beta$  accumulation.

We also assessed whether the RyR2 E4872Q<sup>+/-</sup> mutation can influence neuronal cell death. Consistent with previous reports (Jawhar et al., 2012; Oakley et al., 2006), the number of pyramidal neurons in the subiculum (but not CA1) region was reduced significantly in 10- to 15-month-old 5xFAD<sup>+/-</sup> mouse brain slices



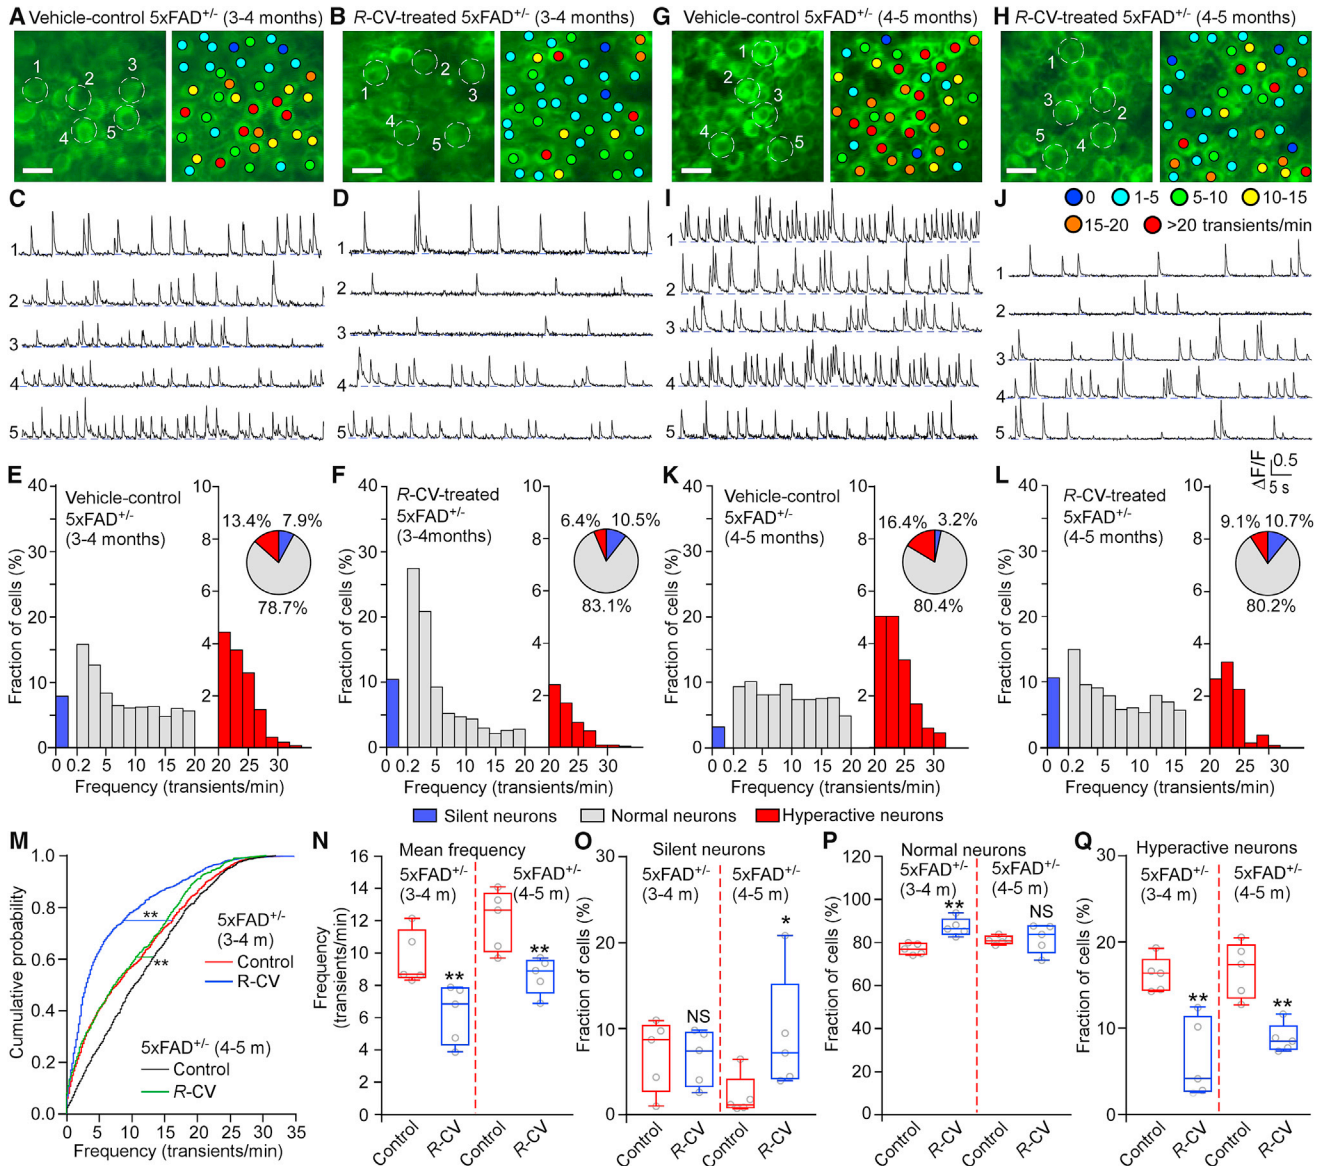

**Figure 4. R-carvedilol Prevents and Rescues Neuronal Hyperactivity of 5xFAD<sup>+/-</sup> Hippocampal CA1 Neurons In Vivo**

(A, B, G, and H) Two-photon *in vivo* Ca<sup>2+</sup> imaging of the hippocampal CA1 region of 3- to 4-month-old (A and B) or 4- to 5-month-old (G and H) 5xFAD<sup>+/-</sup> mice treated with vehicle control (DMSO; A and G) or R-carvedilol (R-CV; 3.2 mg/kg/day; B and H). Colored dots indicate the number of Ca<sup>2+</sup> transients per minute. (C, D, I, and J) Ca<sup>2+</sup> traces of the five neurons circled in (A), (B), (G), and (H), respectively.

(E, F, K, and L) Histograms showing the frequency distribution of Ca<sup>2+</sup> transients in DMSO-treated mice (E and K, 5 mice, 1,066 cells and 5 mice, 897 cells, respectively) and R-CV-treated mice (F and L; 5 mice, 1,181 cells and 5 mice, 757 cells, respectively). Pie charts show the relative proportions of silent, normal, and hyperactive neurons.

(M) Cumulative probability functions showing frequency distributions of spontaneous Ca<sup>2+</sup> transients in the CA1 region of 3- to 4-month-old 5xFAD<sup>+/-</sup> mice treated with DMSO (red) or R-CV (blue) and 5- to 6-month-old 5xFAD<sup>+/-</sup> mice treated with DMSO (black) or R-CV (green) (Kruskal-Wallis test with Dunn's multiple comparisons test).

(N) Mean Ca<sup>2+</sup> transient frequency in the CA1 region of 3- to 4-month-old and 4- to 5-month-old 5xFAD<sup>+/-</sup> mice treated with DMSO or R-CV.

(O-Q) Percentage of silent (O), normal (P), and hyperactive (Q) cells in the CA1 region of 3- to 4- and 4- to 5-month-old 5xFAD<sup>+/-</sup> mice treated with DMSO or R-CV. Scale bars, 10  $\mu$ m. Data shown are the median and range (Kolmogorov-Smirnov test with Dunn-Bonferroni post hoc test and Mann-Whitney U test; \*\*p < 0.01 versus control).

(Figures 6G-6J). The E4872Q<sup>+/-</sup> mutation prevented this subiculum neuronal cell loss, as evidenced by the similar number of subiculum pyramidal neurons in 5xFAD<sup>+/-</sup>/EQ<sup>+/-</sup> and WT brains

(Figure 6H). Like the E4872Q<sup>+/-</sup> mutation, R-carvedilol pretreatment also protected against subiculum neuronal cell loss without affecting A $\beta$  accumulation (Figure 7; Figure S7G-S7L).

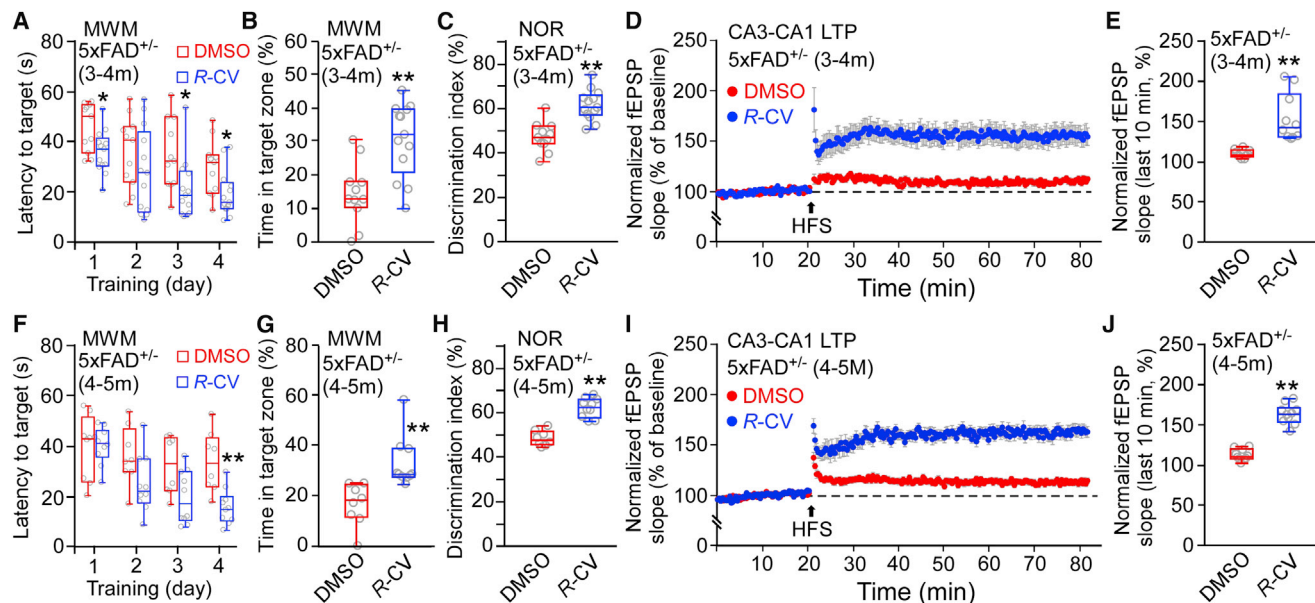

**Figure 5. R-CV Prevents and Rescues Memory Loss and LTP Impairment in 5xFAD<sup>+/-</sup> Mice**

(A and F) The latency to reach the target platform of 3- to 4-month-old (A) and 4- to 5-month-old (F) 5xFAD<sup>+/-</sup> mice treated with DMSO (3–4 months old, n = 11; 4–5 months old, n = 8) or R-CV (3–4 months old, n = 13; 4–5 months old, n = 10) in the MWM test.

(B and G) The time spent in the target quadrant.

(C and H) The percentage of time spent on the novel object for 5xFAD<sup>+/-</sup> mice treated with DMSO (3–4 months old, n = 11; 4–5 months old, n = 8) or R-CV (3–4 months old, n = 13; 4–5 months old, n = 10).

(D and I) Effect of HFS on mean CA3-CA1 fEPSP slope in hippocampal slices from 5xFAD<sup>+/-</sup> mice treated with DMSO (3–4 months old, 10 mice, 20 slices; 4–5 months old, 10 mice, 20 slices) or R-CV (3–4 months old, 10 mice, 20 slices; 4–5 months old, 10 mice, 20 slices).

(E and J) The averaged normalized fEPSP slope of 3- to 4-month-old (E) or 4- to 5-month-old (J) 5xFAD<sup>+/-</sup> mice treated with DMSO or R-CV.

Data shown are the median and range (Mann-Whitney U test; \*p < 0.05, \*\*p < 0.01 compared with the DMSO group). See also Figures S5 and S6.

We performed Golgi staining to determine whether the RyR2 E4872Q<sup>+/-</sup> mutation affects the spine density and morphology of 5xFAD<sup>+/-</sup> CA1 pyramidal neurons. Consistent with previous studies (de Pins et al., 2019; Kim et al., 2020; Yang et al., 2018), the density of overall protrusions and specifically the density of mushroom and branched spines were reduced significantly in 5xFAD<sup>+/-</sup> CA1 pyramidal neurons compared with WT cells (Figure S7M). The E4872Q<sup>+/-</sup> mutation (limiting RyR2 open time) prevented the loss of overall protrusions and branched spines, but not the loss of mushroom spines, of 5xFAD<sup>+/-</sup>/EQ<sup>+/-</sup> CA1 pyramidal cells (Figure S7M). The E4872Q<sup>+/-</sup> mutation also decreased the density of filopodial spines and increased the density of branched spines of the EQ<sup>+/-</sup> CA1 cells compared with WT cells. This indicates that limiting RyR2 open time prevents dendritic spine loss in 5xFAD<sup>+/-</sup> mice despite extensive A $\beta$  accumulation.

## DISCUSSION

An increasing body of evidence indicates that AD progression is driven by a vicious cycle of soluble A $\beta$ -induced neuronal hyperactivity (Busche et al., 2012; Busche and Konnerth, 2015; Stargardt et al., 2015; Zott et al., 2019). Intuitively, reducing the A $\beta$  level would be expected to dampen A $\beta$ -dependent neuronal hyperactivity and AD progression. However, achieving a sufficient A $\beta$  reduction to prevent induction of neuronal hyperactivity and,

consequently, AD progression may be an obstacle, which explains, in part, the failure of some recent A $\beta$ -targeted clinical trials (Chakroborty and Stutzmann, 2014; Honig et al., 2018; Karan et al., 2011). Suppressing neuronal hyperactivity may be an alternative means to break the A $\beta$ -hyperactivity cycle, even in the face of A $\beta$  deposition. Here we tested this concept and demonstrate that limiting RyR2 open time (genetically or pharmacologically) prevents neuronal hyperactivity of CA1 pyramidal neurons *ex vivo* and *in vivo* in a severe early- and rapid-onset AD mouse model (5xFAD). We also show that limiting RyR2 open time prevents LTP deficit, learning and memory impairment, neuronal cell death, and dendritic spine loss in 5xFAD mice. Importantly, all of these AD-related deficits were prevented even with continued accumulation of A $\beta$ . These findings identify RyR2 open time as a promising target for suppressing neuronal hyperactivity and AD progression irrespective of A $\beta$  deposition.

The exact mechanism(s) underlying RyR2-mediated constraint of neuronal hyperactivity of hippocampal CA1 neurons has yet to be defined, but it is likely to be complex and multifactorial. Here we focused on the effect of limiting RyR2 open time on the intrinsic excitability of CA1 pyramidal neurons, a key determinant of neuronal activity, learning, and memory (Brager and Johnston, 2007; Kerrigan et al., 2014; Tamagnini et al., 2015; Xu et al., 2005). Intracellular RyR-mediated Ca<sup>2+</sup> release is known to regulate neuronal intrinsic excitability by modulating the Ca<sup>2+</sup>-activated K<sup>+</sup> channel-mediated I<sub>AHP</sub> (Bodhinathan et al., 2010; van

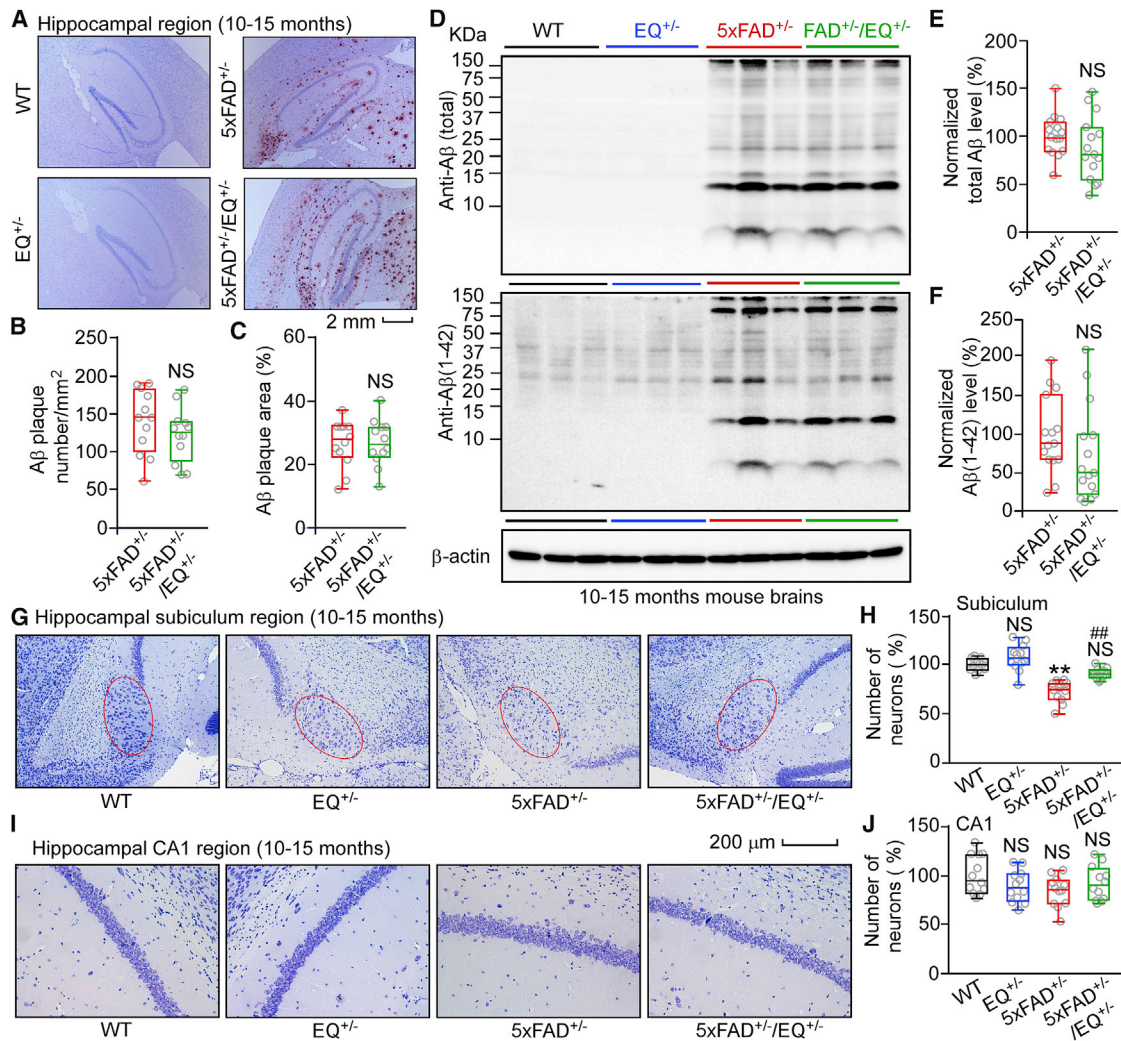

**Figure 6. E4872Q<sup>-/-</sup> Has No Significant Effects on A $\beta$  Accumulation but Protects against Neuron Loss in 5x FAD<sup>-/-</sup> Mice**

(A) A $\beta$  deposition in the hippocampal region of 10- to 15-month-old WT, EQ<sup>-/-</sup>, 5x FAD<sup>-/-</sup>, and 5x FAD<sup>-/-</sup>/EQ<sup>-/-</sup> mice.  
 (B) Averaged A $\beta$  plaque numbers in the hippocampal region of 10- to 15-month-old 5x FAD<sup>-/-</sup> (12 mice, 36 slices) and 5x FAD<sup>-/-</sup>/EQ<sup>-/-</sup> (12 mice, 36 slices) mice.  
 (C) Percentage of the hippocampal area showing positive A $\beta$  staining.  
 (D) Immunoblot analysis of brain homogenates from 10- to 15-month-old WT, EQ<sup>-/-</sup>, 5x FAD<sup>-/-</sup>, and 5x FAD<sup>-/-</sup>/EQ<sup>-/-</sup> mice.  
 (E and F) Normalized total A $\beta$  levels (E) and normalized A $\beta$ (1–42) levels (F) in WT (n = 15), EQ<sup>-/-</sup> (n = 11), 5x FAD<sup>-/-</sup> (n = 21), and 5x FAD<sup>-/-</sup>/EQ<sup>-/-</sup> (n = 20) brains.  
 (G) Images of Nissl staining of 10- to 15-month-old WT, EQ<sup>-/-</sup>, 5x FAD<sup>-/-</sup> and 5x FAD<sup>-/-</sup>/EQ<sup>-/-</sup> mouse brain sections.  
 (H) Numbers of pyramidal neurons in the subiculum region (red oval) of WT (12 mice, 36 slices), EQ<sup>-/-</sup> (12 mice, 36 slices), 5x FAD<sup>-/-</sup> (12 mice, 36 slices), and 5x FAD<sup>-/-</sup>/EQ<sup>-/-</sup> (12 mice, 36 slices) mice.  
 (I) Images of Nissl staining of 10- to 15-month-old WT, EQ<sup>-/-</sup>, 5x FAD<sup>-/-</sup>, and 5x FAD<sup>-/-</sup>/EQ<sup>-/-</sup> mouse brain sections.  
 (J) Numbers of pyramidal neurons in the CA1 region of WT (12 mice, 36 slices), EQ<sup>-/-</sup> (12 mice, 36 slices), 5x FAD<sup>-/-</sup> (12 mice, 36 slices), and 5x FAD<sup>-/-</sup>/EQ<sup>-/-</sup> (12 mice, 36 slices) mice.  
 Scale bars, 2 mm in (A) and 200  $\mu$ m in (G) and (I). Data shown are the median and range (Mann-Whitney U test and Kruskal-Wallis test with Dunn-Bonferroni post hoc test; \*\*p < 0.01 versus WT, ##p < 0.01; 5x FAD<sup>-/-</sup>/EQ<sup>-/-</sup> versus 5x FAD<sup>-/-</sup>). See also Figure S7.

de Vrede et al., 2007). RyR-mediated Ca<sup>2+</sup> release also affects neuronal activity by modulating presynaptic activity (Chakroborty et al., 2012b, 2019; Le Magueresse and Cherubini, 2007). Thus, one possibility is that limiting RyR2 open time may contribute to suppression of neuronal hyperactivity by decreasing membrane excitability through modulation of I<sub>AHP</sub> and/or presynaptic activity. To test this possibility, we employed a genetic approach to assess

whether limiting RyR2 open time alters I<sub>AHP</sub> and/or presynaptic activity. Surprisingly, genetically limiting RyR2 open time did not have a major effect on I<sub>AHP</sub> or spontaneous synaptic input in hippocampal CA1 neurons.

The A-type K<sup>+</sup> current plays a major role in controlling neuronal excitability of hippocampal CA1 neurons (Hall et al., 2015; Jung and Hoffman, 2009; Kim et al., 2005; Magee et al., 1998; Varga

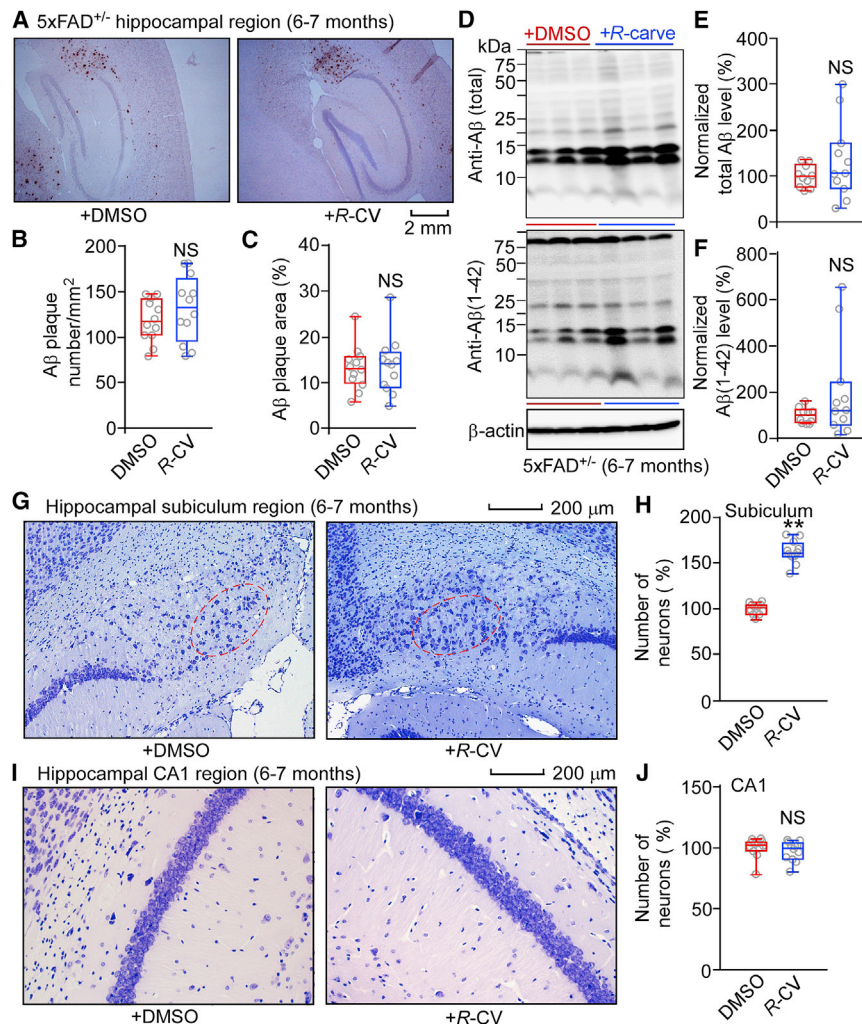

**Figure 7. R-CV Treatment Has No Significant Effects on A $\beta$  Accumulation but Protects against Neuron loss in 6- to 7-Month-Old 5xFAD $^{+/-}$  Mice**

(A) A $\beta$  deposition in 6- to 7-month-old 5xFAD $^{+/-}$  mice treated with DMSO or R-CV. (B) Averaged A $\beta$  plaque numbers in the hippocampal region of 6- to 7-month-old 5xFAD $^{+/-}$  mice treated with DMSO (12 mice, 36 slices) or R-CV (12 mice, 36 slices). (C) Percentage of the hippocampal area showing positive A $\beta$  staining. (D) Immunoblot analysis of brain tissue homogenates from 6- to 7-month-old 5xFAD $^{+/-}$  mice treated with DMSO or R-CV. (E and F) Normalized total A $\beta$  levels (E) and normalized A $\beta$  (1-42) levels (F) in 5xFAD $^{+/-}$  mice treated with DMSO (n = 10) or R-CV (n = 11). (G) Images of Nissl staining of 6- to 7-month-old 5xFAD $^{+/-}$  mice treated with DMSO or R-CV. (H) Numbers of pyramidal neurons in the subiculum region (red oval) of 6- to 7-month-old 5xFAD $^{+/-}$  mice treated with DMSO (12 mice, 36 slices) or R-CV (12 mice, 36 slices). (I) Images of Nissl staining of 6- to 7-month-old 5xFAD $^{+/-}$  mice treated with DMSO or R-CV. (J) Numbers of pyramidal neurons in the CA1 region of 6- to 7-month-old 5xFAD $^{+/-}$  mice treated with DMSO (12 mice, 36 slices) or R-CV (12 mice, 36 slices). Scale bars, 2 mm in (A) and 200  $\mu$ m in (G) and (I). Data shown are the median and range (Mann-Whitney *U* test; \*\*p < 0.01 compared with the DMSO group). See also Figure S7.

and this was completely restored by limiting RyR2 open time. Thus, our work establishes a previously unknown mode of RyR2 control of the A-type K $^{+}$  current.

et al., 2004). Interestingly, the A-type K $^{+}$  current is downregulated by activity- and Ca $^{2+}$  influx-dependent reduction in the surface expression of the A-type K $^{+}$  channel subunit Kv4.2, which is modulated by a Ca $^{2+}$  binding protein called KCHIP4 (Kim et al., 2007a; Morohashi et al., 2002). This Ca $^{2+}$  dependence of Kv4.2 trafficking raises the possibility that RyR2-mediated intracellular Ca $^{2+}$  release may also regulate Kv4.2 surface expression and, thus, the A-type K $^{+}$  current, considering the close relationship between Ca $^{2+}$  influx and RyR2-mediated Ca $^{2+}$  release (Kim et al., 2007b; Sandler and Barbara, 1999). Because RyR2 is abundantly expressed in hippocampal CA1 pyramidal neurons, it is reasonable to propose that limiting RyR2 open time and, thus, RyR2-mediated Ca $^{2+}$  release in these neurons may affect Kv4.2 trafficking and consequently the A-type K $^{+}$  current. Indeed, we found that limiting RyR2 open time increased the surface expression of Kv4.2, upregulated the A-type K $^{+}$  current in a KCHIP4-dependent manner, and decreased membrane excitability. The A-type K $^{+}$  current is downregulated in AD mouse models (Chen, 2005; Good et al., 1996; Hall et al., 2015; Scala et al., 2015). This is consistent with our finding that the A-type K $^{+}$  current was significantly reduced in 5xFAD $^{+/-}$  CA1 neurons,

Interestingly, loss-of-function variants in the Kv4.2-associated protein, dipeptidyl-peptidase 6 (DPP6), have recently been associated with early-onset AD (Cacace et al., 2019). DPP6 is known to enhance the surface expression of Kv4.2 and regulate its gating (Sun et al., 2011). Thus, loss of DPP6 may contribute to neuronal hyperactivity and AD progression by downregulating Kv4.2. Indeed, the mRNA level of hippocampal A-type K $^{+}$  channels in human AD patients is downregulated (Noh et al., 2019).

Enhanced RyR2 function and expression have been implicated in AD pathogenesis (Bruno et al., 2012; Chakroborty et al., 2009; Kelliher et al., 1999; Lacampagne et al., 2017; Ouilès et al., 2012; SanMartín et al., 2017; Smith et al., 2005). An effective and safe means to suppress this enhanced RyR2 function, however, remains to be identified. We have shown previously that limiting RyR2 open time prevents ventricular arrhythmias in animal models without detrimental effects on the heart (Chen et al., 2014; Zhang et al., 2015). Here we show that limiting RyR2 open time prevents cognitive dysfunction in 5xFAD $^{+/-}$  mice without detrimental effects on normal brain function. This indicates that limiting RyR2 open time (as opposed to blocking

channel conduction) is a promising and effective means to combat neuronal disorders associated with overactive RyR2.

We reported previously that carvedilol limits RyR2 open time (Zhou et al., 2011). This carvedilol's action is analogous to that of the RyR2 E4872Q<sup>+/-</sup> mutation, suggesting that carvedilol, like E4872Q<sup>+/-</sup>, may suppress AD progression. Unfortunately, RyR2 inhibition requires a high carvedilol dose (Zhou et al., 2011), which produces excessive  $\beta$ -blockade and severe adverse effects (Ko et al., 2004; Packer et al., 1996). Carvedilol is a racemic mixture of 50% S-carvedilol (a  $\beta$ -blocker) and 50% R-carvedilol (a non- $\beta$ -blocker) (Bartsch et al., 1990; Nichols et al., 1989; Stoschitzky et al., 2001; van Zwieten, 1993). Importantly, the non- $\beta$ -blocking R-carvedilol enantiomer also limits RyR2 open time (Zhang et al., 2015). Thus, application of just R-carvedilol may be a means to limit neuronal hyperactivity without severe  $\beta$ -blockade. Indeed, we showed that R-carvedilol pretreatment of 5xFAD<sup>+/-</sup> mice before or after appearance of AD symptoms prevented and rescued neuronal hyperactivity and memory loss. On the other hand, pretreatment with the carvedilol racemic mixture did not prevent learning and memory deficits in 5xFAD<sup>+/-</sup> mice, which may explain the negative outcome of a recent AD clinical trial of the carvedilol racemic mixture (<https://www.clinicaltrials.gov/ct2/show/study/NCT01354444>). The exact reason why the carvedilol racemic mixture is ineffective in suppressing AD progression is unknown. One possible explanation is that the potent  $\beta$ -blocking action of the racemic carvedilol mixture (especially at high doses) may adversely influence neuronal and cognitive function. Notably, R-carvedilol pretreatment rescued learning and memory impairments even in aged 5xFAD<sup>+/-</sup> mice (6–7 and 10–12 months old) with extensive A $\beta$  accumulation. This shows that limiting RyR2 open time can restore AD-deficits even in late stages of AD. Thus, the R-carvedilol enantiomer is a non-A $\beta$ -targeted, hyperactivity-directed, anti-AD therapeutic agent that warrants additional preclinical studies and even clinical trial.

## STAR★METHODS

Detailed methods are provided in the online version of this paper and include the following:

- KEY RESOURCES TABLE
- RESOURCE AVAILABILITY
  - Lead Contact
  - Materials Availability
  - Data and Code Availability
- EXPERIMENTAL MODEL AND SUBJECT DETAILS
  - Mouse models
  - Cell lines
- METHOD DETAILS
  - Acute brain slice preparation
  - Whole-cell patch-clamp recordings
  - *In vivo* 2-photon Ca<sup>2+</sup> imaging of CA1 neurons
  - *Ex vivo* 2-photon Ca<sup>2+</sup> imaging of CA1 neurons
  - Long-term potentiation recording
  - Learning and memory tests
  - Biotinylation assays
  - Immunoblotting
  - Immunohistochemical and Nissl staining

- Single-cell Ca<sup>2+</sup> imaging of HEK293 cells
- Dendritic spine density analysis

## ● QUANTIFICATION AND STATISTICAL ANALYSIS

## SUPPLEMENTAL INFORMATION

Supplemental Information can be found online at <https://doi.org/10.1016/j.celrep.2020.108169>.

## ACKNOWLEDGMENTS

This work was supported by research grants from the Canadian Institutes of Health Research to R.J.T. (PJT-169174; PJT-168968), R.W.T. (PJT-156153), G.R.G. (FDN-148471), and S.R.W.C. (PJT-152914), the National Institutes of Health to M.F. (R01 HL057832; R01 GM111397), and the Heart and Stroke Foundation Chair in Cardiovascular Research to S.R.W.C. We gratefully acknowledge generous donations from the Alvin and Mona Libin Foundation, Canadian Pacific Railway Company (CP), the Mozell Family, and the Libin Cardiovascular Institute. We thank Dr. Xiaowei Chen (Army Medical University, China) for invaluable advice and discussions.

## AUTHOR CONTRIBUTIONS

J.Y., B.S., A.I., X.Z., H.t.K., T.G.B., M.F., R.J.T., R.W.T., G.R.G., and S.R.W.C. designed the research. J.Y., B.S., A.I., X.Z., W.G., Z.S., Y.L., F.H., A.K.J.B., M.K., and R.W. performed the research. J.Y., B.S., X.Z., W.G., Z.S., M.N., R.W., and S.R.W.C. analyzed the data. J.Y., B.S., H.t.K., T.G.B., M.F., R.J.T., R.W.T., G.R.G., and S.R.W.C. wrote the paper.

## DECLARATION OF INTERESTS

We are planning to submit a Provisional Application for Patent, entitled “METHODS OF TREATING ALZHEIMER'S DISEASE OR DELAYING PROGRESSION THEREOF BY LIMITING RYANODINE RECEPTOR OPEN TIME.”

Received: October 28, 2019

Revised: July 23, 2020

Accepted: August 27, 2020

Published: September 22, 2020

## REFERENCES

- Alkon, D.L., Nelson, T.J., Zhao, W., and Cavallaro, S. (1998). Time domains of neuronal Ca<sup>2+</sup> signaling and associative memory: steps through a calcein, ryanodine receptor, K<sup>+</sup> channel cascade. *Trends Neurosci.* *21*, 529–537.
- Bartsch, W., Sponer, G., Strein, K., Müller-Beckmann, B., Kling, L., Böhm, E., Martin, U., and Borbe, H.O. (1990). Pharmacological characteristics of the stereoisomers of carvedilol. *Eur. J. Clin. Pharmacol.* *38* (Suppl 2), S104–S107.
- Berridge, M.J. (2010). Calcium hypothesis of Alzheimer's disease. *Pflügers Arch.* *459*, 441–449.
- Bers, D.M. (2002). Cardiac excitation-contraction coupling. *Nature* *415*, 198–205.
- Bodhinathan, K., Kumar, A., and Foster, T.C. (2010). Redox sensitive calcium stores underlie enhanced after hyperpolarization of aged neurons: role for ryanodine receptor mediated calcium signaling. *J. Neurophysiol.* *104*, 2586–2593.
- Bogdanov, K.Y., Vinogradova, T.M., and Lakatta, E.G. (2001). Sinoatrial nodal cell ryanodine receptor and Na(+)-Ca(2+) exchanger: molecular partners in pacemaker regulation. *Circ. Res.* *88*, 1254–1258.
- Brager, D.H., and Johnston, D. (2007). Plasticity of intrinsic excitability during long-term depression is mediated through mGluR-dependent changes in I(h) in hippocampal CA1 pyramidal neurons. *J. Neurosci.* *27*, 13926–13937.
- Bround, M.J., Asghari, P., Wambolt, R.B., Bohunek, L., Smits, C., Philit, M., Kieffer, T.J., Lakatta, E.G., Boheler, K.R., Moore, E.D., et al. (2012). Cardiac

- ryanodine receptors control heart rate and rhythmicity in adult mice. *Cardiovasc. Res.* **96**, 372–380.
- Brown, J.T., Chin, J., Leiser, S.C., Pangalos, M.N., and Randall, A.D. (2011). Altered intrinsic neuronal excitability and reduced Na<sup>+</sup> currents in a mouse model of Alzheimer's disease. *Neurobiol. Aging* **32**, 2109.e1–2109.e14.
- Bruno, A.M., Huang, J.Y., Bennett, D.A., Marr, R.A., Hastings, M.L., and Stutzmann, G.E. (2012). Altered ryanodine receptor expression in mild cognitive impairment and Alzheimer's disease. *Neurobiol. Aging* **33**, 1001.e1–1001.e6.
- Busche, M.A. (2018). In Vivo Two-Photon Calcium Imaging of Hippocampal Neurons in Alzheimer Mouse Models. *Methods Mol. Biol.* **1750**, 341–351.
- Busche, M.A., and Konnerth, A. (2015). Neuronal hyperactivity—A key defect in Alzheimer's disease? *BioEssays* **37**, 624–632.
- Busche, M.A., and Konnerth, A. (2016). Impairments of neural circuit function in Alzheimer's disease. *Philos. Trans. R. Soc. Lond. B Biol. Sci.* **371**, 20150429.
- Busche, M.A., Eichhoff, G., Adelsberger, H., Abramowski, D., Wiederhold, K.H., Haass, C., Staufenbiel, M., Konnerth, A., and Garaschuk, O. (2008). Clusters of hyperactive neurons near amyloid plaques in a mouse model of Alzheimer's disease. *Science* **321**, 1686–1689.
- Busche, M.A., Chen, X., Henning, H.A., Reichwald, J., Staufenbiel, M., Sakmann, B., and Konnerth, A. (2012). Critical role of soluble amyloid- $\beta$  for early hippocampal hyperactivity in a mouse model of Alzheimer's disease. *Proc. Natl. Acad. Sci. USA* **109**, 8740–8745.
- Busche, M.A., Wegmann, S., Dujardin, S., Commins, C., Schiantarelli, J., Klickstein, N., Kamath, T.V., Carlson, G.A., Nelken, I., and Hyman, B.T. (2019). Tau impairs neural circuits, dominating amyloid- $\beta$  effects, in Alzheimer models in vivo. *Nat. Neurosci.* **22**, 57–64.
- Cacace, R., Heeman, B., Van Mossevelde, S., De Roeck, A., Hoogmartens, J., De Rijck, P., Gossye, H., De Vos, K., De Coster, W., Strazisar, M., et al.; BELNEU Consortium (2019). Loss of DPP6 in neurodegenerative dementia: a genetic player in the dysfunction of neuronal excitability. *Acta Neuropathol.* **137**, 901–918.
- Chakroborty, S., and Stutzmann, G.E. (2014). Calcium channelopathies and Alzheimer's disease: insight into therapeutic success and failures. *Eur. J. Pharmacol.* **739**, 83–95.
- Chakroborty, S., Goussakov, I., Miller, M.B., and Stutzmann, G.E. (2009). Deviant ryanodine receptor-mediated calcium release resets synaptic homeostasis in presymptomatic 3xTg-AD mice. *J. Neurosci.* **29**, 9458–9470.
- Chakroborty, S., Briggs, C., Miller, M.B., Goussakov, I., Schneider, C., Kim, J., Wicks, J., Richardson, J.C., Conklin, V., Cameransi, B.G., and Stutzmann, G.E. (2012a). Stabilizing ER Ca<sup>2+</sup> channel function as an early preventative strategy for Alzheimer's disease. *PLoS ONE* **7**, e52056.
- Chakroborty, S., Kim, J., Schneider, C., Jacobson, C., Molgó, J., and Stutzmann, G.E. (2012b). Early presynaptic and postsynaptic calcium signaling abnormalities mask underlying synaptic depression in presymptomatic Alzheimer's disease mice. *J. Neurosci.* **32**, 8341–8353.
- Chakroborty, S., Hill, E.S., Christian, D.T., Helfrich, R., Riley, S., Schneider, C., Kapecki, N., Mustaly-Kalimi, S., Seiler, F.A., Peterson, D.A., et al. (2019). Reduced presynaptic vesicle stores mediate cellular and network plasticity defects in an early-stage mouse model of Alzheimer's disease. *Mol. Neurodegener.* **14**, 7.
- Chan, C.H. (1990). Dantrolene sodium and hepatic injury. *Neurology* **40**, 1427–1432.
- Chan, S.L., Mayne, M., Holden, C.P., Geiger, J.D., and Mattson, M.P. (2000). Presenilin-1 mutations increase levels of ryanodine receptors and calcium release in PC12 cells and cortical neurons. *J. Biol. Chem.* **275**, 18195–18200.
- Chen, C. (2005). beta-Amyloid increases dendritic Ca<sup>2+</sup> influx by inhibiting the A-type K<sup>+</sup> current in hippocampal CA1 pyramidal neurons. *Biochem. Biophys. Res. Commun.* **338**, 1913–1919.
- Chen, Q., Cichon, J., Wang, W., Qiu, L., Lee, S.J., Campbell, N.R., Destefino, N., Goard, M.J., Fu, Z., Yasuda, R., et al. (2012). Imaging neural activity using Thy1-GCaMP transgenic mice. *Neuron* **76**, 297–308.
- Chen, T.W., Wardill, T.J., Sun, Y., Pulver, S.R., Renninger, S.L., Baohan, A., Schreiter, E.R., Kerr, R.A., Orger, M.B., Jayaraman, V., et al. (2013). Ultrasensitive fluorescent proteins for imaging neuronal activity. *Nature* **499**, 295–300.
- Chen, W., Wang, R., Chen, B., Zhong, X., Kong, H., Bai, Y., Zhou, Q., Xie, C., Zhang, J., Guo, A., et al. (2014). The ryanodine receptor store-sensing gate controls Ca<sup>2+</sup> waves and Ca<sup>2+</sup>-triggered arrhythmias. *Nat. Med.* **20**, 184–192.
- Chen-Engerer, H.J., Hartmann, J., Karl, R.M., Yang, J., Feske, S., and Konnerth, A. (2019). Two types of functionally distinct Ca<sup>2+</sup> stores in hippocampal neurons. *Nat. Commun.* **10**, 3223.
- Cirrito, J.R., Yamada, K.A., Finn, M.B., Sloviter, R.S., Bales, K.R., May, P.C., Schoepp, D.D., Paul, S.M., Mennerick, S., and Holtzman, D.M. (2005). Synaptic activity regulates interstitial fluid amyloid-beta levels in vivo. *Neuron* **48**, 913–922.
- Dana, H., Chen, T.W., Hu, A., Shields, B.C., Guo, C., Looger, L.L., Kim, D.S., and Svoboda, K. (2014). Thy1-GCaMP6 transgenic mice for neuronal population imaging in vivo. *PLoS ONE* **9**, e108697.
- de Pins, B., Cifuentes-Díaz, C., Farah, A.T., López-Molina, L., Montalban, E., Sancho-Balsells, A., López, A., Ginés, S., Delgado-García, J.M., Alberch, J., et al. (2019). Conditional BDNF Delivery from Astrocytes Rescues Memory Deficits, Spine Density, and Synaptic Properties in the 5xFAD Mouse Model of Alzheimer Disease. *J. Neurosci.* **39**, 2441–2458.
- Delekate, A., Füchtmeier, M., Schumacher, T., Ulbrich, C., Foddis, M., and Petzold, G.C. (2014). Metabotropic P2Y1 receptor signalling mediates astrocytic hyperactivity in vivo in an Alzheimer's disease mouse model. *Nat. Commun.* **5**, 5422.
- Demattos, R.B., Lu, J., Tang, Y., Racke, M.M., DeLong, C.A., Tzaferis, J.A., Hole, J.T., Forster, B.M., McDonnell, P.C., Liu, F., et al. (2012). A plaque-specific antibody clears existing  $\beta$ -amyloid plaques in Alzheimer's disease mice. *Neuron* **76**, 908–920.
- Dickerson, B.C., Salat, D.H., Greve, D.N., Chua, E.F., Rand-Giovannetti, E., Rentz, D.M., Bertram, L., Mullin, K., Tanzi, R.E., Blacker, D., et al. (2005). Increased hippocampal activation in mild cognitive impairment compared to normal aging and AD. *Neurology* **65**, 404–411.
- Eichhoff, G., and Garaschuk, O. (2011). Two-photon imaging of neural networks in a mouse model of Alzheimer's disease. *Cold Spring Harb. Protoc.* **2011**, 1206–1216.
- Furuichi, T., Furutama, D., Hakamata, Y., Nakai, J., Takeshima, H., and Mikoshiba, K. (1994). Multiple types of ryanodine receptor/Ca<sup>2+</sup> release channels are differentially expressed in rabbit brain. *J. Neurosci.* **14**, 4794–4805.
- Giannini, G., Conti, A., Mammarella, S., Scrobogna, M., and Sorrentino, V. (1995). The ryanodine receptor/calcium channel genes are widely and differentially expressed in murine brain and peripheral tissues. *J. Cell Biol.* **128**, 893–904.
- Good, T.A., Smith, D.O., and Murphy, R.M. (1996). Beta-amyloid peptide blocks the fast-inactivating K<sup>+</sup> current in rat hippocampal neurons. *Biophys. J.* **70**, 296–304.
- Guan, J., Li, J., Liang, S., Li, R., Li, X., Shi, X., Huang, C., Zhang, J., Pan, J., Jia, H., et al. (2018). NeuroSeg: automated cell detection and segmentation for in vivo two-photon Ca<sup>2+</sup> imaging data. *Brain Struct. Funct.* **223**, 519–533.
- Hall, A.M., Throesch, B.T., Buckingham, S.C., Markwardt, S.J., Peng, Y., Wang, Q., Hoffman, D.A., and Roberson, E.D. (2015). Tau-dependent Kv4.2 depletion and dendritic hyperexcitability in a mouse model of Alzheimer's disease. *J. Neurosci.* **35**, 6221–6230.
- Hardy, J., and Selkoe, D.J. (2002). The amyloid hypothesis of Alzheimer's disease: progress and problems on the road to therapeutics. *Science* **297**, 353–356.
- Hiess, F., Vallmitjana, A., Wang, R., Cheng, H., ter Keurs, H.E., Chen, J., Hove-Madsen, L., Benitez, R., and Chen, S.R. (2015). Distribution and Function of Cardiac Ryanodine Receptor Clusters in Live Ventricular Myocytes. *J. Biol. Chem.* **290**, 20477–20487.
- Hoffman, D.A., Magee, J.C., Colbert, C.M., and Johnston, D. (1997). K<sup>+</sup> channel regulation of signal propagation in dendrites of hippocampal pyramidal neurons. *Nature* **387**, 869–875.

- Honig, L.S., Vellas, B., Woodward, M., Boada, M., Bullock, R., Borrie, M., Hager, K., Andreasen, N., Scarpini, E., Liu-Seifert, H., et al. (2018). Trial of Solanezumab for Mild Dementia Due to Alzheimer's Disease. *N. Engl. J. Med.* **378**, 321–330.
- Jawhar, S., Trawicka, A., Jenneckens, C., Bayer, T.A., and Wirths, O. (2012). Motor deficits, neuron loss, and reduced anxiety coinciding with axonal degeneration and intraneuronal A $\beta$  aggregation in the 5XFAD mouse model of Alzheimer's disease. *Neurobiol. Aging* **33**, 196.e29–196.e40.
- Jiang, D., Xiao, B., Yang, D., Wang, R., Choi, P., Zhang, L., Cheng, H., and Chen, S.R.W. (2004). RyR2 mutations linked to ventricular tachycardia and sudden death reduce the threshold for store-overload-induced Ca<sup>2+</sup> release (SOICR). *Proc. Natl. Acad. Sci. USA* **101**, 13062–13067.
- Jiang, D., Wang, R., Xiao, B., Kong, H., Hunt, D.J., Choi, P., Zhang, L., and Chen, S.R.W. (2005). Enhanced store overload-induced Ca<sup>2+</sup> release and channel sensitivity to luminal Ca<sup>2+</sup> activation are common defects of RyR2 mutations linked to ventricular tachycardia and sudden death. *Circ. Res.* **97**, 1173–1181.
- Jung, S.C., and Hoffman, D.A. (2009). Biphasic somatic A-type K channel downregulation mediates intrinsic plasticity in hippocampal CA1 pyramidal neurons. *PLoS ONE* **4**, e6549.
- Kamenetz, F., Tomita, T., Hsieh, H., Seabrook, G., Borchelt, D., Iwatsubo, T., Sisodia, S., and Malinow, R. (2003). APP processing and synaptic function. *Neuron* **37**, 925–937.
- Karran, E., Mercken, M., and De Strooper, B. (2011). The amyloid cascade hypothesis for Alzheimer's disease: an appraisal for the development of therapeutics. *Nat. Rev. Drug Discov.* **10**, 698–712.
- Kelliher, M., Fastbom, J., Cowburn, R.F., Bonkale, W., Ohm, T.G., Ravid, R., Sorrentino, V., and O'Neill, C. (1999). Alterations in the ryanodine receptor calcium release channel correlate with Alzheimer's disease neurofibrillary and beta-amyloid pathologies. *Neuroscience* **92**, 499–513.
- Kennedy, M.E., Stamford, A.W., Chen, X., Cox, K., Cumming, J.N., Dockendorff, M.F., Egan, M., Ereshefsky, L., Hodgson, R.A., Hyde, L.A., et al. (2016). The BACE1 inhibitor verubecestat (MK-8931) reduces CNS  $\beta$ -amyloid in animal models and in Alzheimer's disease patients. *Sci. Transl. Med.* **8**, 363ra150.
- Kerr, J.N., Greenberg, D., and Helmchen, F. (2005). Imaging input and output of neocortical networks in vivo. *Proc. Natl. Acad. Sci. USA* **102**, 14063–14068.
- Kerrigan, T.L., Brown, J.T., and Randall, A.D. (2014). Characterization of altered intrinsic excitability in hippocampal CA1 pyramidal cells of the A $\beta$ -overproducing PDAPP mouse. *Neuropharmacology* **79**, 515–524.
- Keskin, A.D., Kekuš, M., Adelsberger, H., Neumann, U., Shimshak, D.R., Song, B., Zott, B., Peng, T., Förstl, H., Staufienbiel, M., et al. (2017). BACE inhibition-dependent repair of Alzheimer's pathophysiology. *Proc. Natl. Acad. Sci. USA* **114**, 8631–8636.
- Kim, J., Wei, D.S., and Hoffman, D.A. (2005). Kv4 potassium channel subunits control action potential repolarization and frequency-dependent broadening in rat hippocampal CA1 pyramidal neurones. *J. Physiol.* **569**, 41–57.
- Kim, J., Jung, S.C., Clemens, A.M., Petralia, R.S., and Hoffman, D.A. (2007a). Regulation of dendritic excitability by activity-dependent trafficking of the A-type K<sup>+</sup> channel subunit Kv4.2 in hippocampal neurons. *Neuron* **54**, 933–947.
- Kim, S., Yun, H.M., Baik, J.H., Chung, K.C., Nah, S.Y., and Rhim, H. (2007b). Functional interaction of neuronal Cav1.3 L-type calcium channel with ryanodine receptor type 2 in the rat hippocampus. *J. Biol. Chem.* **282**, 32877–32889.
- Kim, D., Baik, S.H., Kang, S., Cho, S.W., Bae, J., Cha, M.Y., Sailor, M.J., Mook-Jung, I., and Ahn, K.H. (2016). Close Correlation of Monoamine Oxidase Activity with Progress of Alzheimer's Disease in Mice, Observed by *in Vivo* Two-Photon Imaging. *ACS Cent. Sci.* **2**, 967–975.
- Kim, H., Kim, B., Kim, H.S., and Cho, J.Y. (2020). Nicotinamide attenuates the decrease in dendritic spine density in hippocampal primary neurons from 5xFAD mice, an Alzheimer's disease animal model. *Mol. Brain* **13**, 17.
- Ko, D.T., Hebert, P.R., Coffey, C.S., Curtis, J.P., Foody, J.M., Sedrakyan, A., and Krumholz, H.M. (2004). Adverse effects of beta-blocker therapy for patients with heart failure: a quantitative overview of randomized trials. *Arch. Intern. Med.* **164**, 1389–1394.
- Lacampagne, A., Liu, X., Reiken, S., Bussiere, R., Meli, A.C., Lauritzen, I., Teich, A.F., Zalk, R., Saint, N., Arancio, O., et al. (2017). Post-translational remodeling of ryanodine receptor induces calcium leak leading to Alzheimer's disease-like pathologies and cognitive deficits. *Acta Neuropathol.* **134**, 749–767.
- Le Magueresse, C., and Cherubini, E. (2007). Presynaptic calcium stores contribute to nicotine-elicited potentiation of evoked synaptic transmission at CA3-CA1 connections in the neonatal rat hippocampus. *Hippocampus* **17**, 316–325.
- Leão, R.N., Colom, L.V., Borgius, L., Kiehn, O., and Fisahn, A. (2012). Medial septal dysfunction by A $\beta$ -induced KCNQ channel-block in glutamatergic neurons. *Neurobiol. Aging* **33**, 2046–2061.
- Lerdkrai, C., Asavapanumas, N., Brawek, B., Kovalchuk, Y., Mojtahedi, N., Omedillas Del Moral, M., and Garaschuk, O. (2018). Intracellular Ca<sup>2+</sup> stores control *in vivo* neuronal hyperactivity in a mouse model of Alzheimer's disease. *Proc. Natl. Acad. Sci. USA* **115**, E1279–E1288.
- Lin, L., Sun, W., Wikenheiser, A.M., Kung, F., and Hoffman, D.A. (2010). KChIP4a regulates Kv4.2 channel trafficking through PKA phosphorylation. *Mol. Cell. Neurosci.* **43**, 315–325.
- Liu, J., Supnet, C., Sun, S., Zhang, H., Good, L., Popugaeva, E., and Bezprozvanny, I. (2014). The role of ryanodine receptor type 3 in a mouse model of Alzheimer disease. *Channels (Austin)* **8**, 230–242.
- Magee, J., Hoffman, D., Colbert, C., and Johnston, D. (1998). Electrical and calcium signaling in dendrites of hippocampal pyramidal neurons. *Annu. Rev. Physiol.* **60**, 327–346.
- Mandikian, D., Bocksteins, E., Parajuli, L.K., Bishop, H.I., Cerda, O., Shigemoto, R., and Trimmer, J.S. (2014). Cell type-specific spatial and functional coupling between mammalian brain Kv2.1 K<sup>+</sup> channels and ryanodine receptors. *J. Comp. Neurol.* **522**, 3555–3574.
- Maxwell, J.T., Domeier, T.L., and Blatter, L.A. (2012). Dantrolene prevents arrhythmogenic Ca<sup>2+</sup> release in heart failure. *Am. J. Physiol. Heart Circ. Physiol.* **302**, H953–H963.
- Morohashi, Y., Hatano, N., Ohya, S., Takikawa, R., Watabiki, T., Takasugi, N., Imaizumi, Y., Tomita, T., and Iwatsubo, T. (2002). Molecular cloning and characterization of CALP/KChIP4, a novel EF-hand protein interacting with presenilin 2 and voltage-gated potassium channel subunit Kv4. *J. Biol. Chem.* **277**, 14965–14975.
- Murayama, T., and Ogawa, Y. (1996). Properties of Ryr3 ryanodine receptor isoform in mammalian brain. *J. Biol. Chem.* **271**, 5079–5084.
- Nelson, M.T., Cheng, H., Rubart, M., Santana, L.F., Bonev, A.D., Knot, H.J., and Lederer, W.J. (1995). Relaxation of arterial smooth muscle by calcium sparks. *Science* **270**, 633–637.
- Nichols, A.J., Sulpizio, A.C., Ashton, D.J., Hieble, J.P., and Ruffolo, R.R., Jr. (1989). The interaction of the enantiomers of carvedilol with alpha 1- and beta 1-adrenoceptors. *Chirality* **1**, 265–270.
- Noh, W., Pak, S., Choi, G., Yang, S., and Yang, S. (2019). Transient Potassium Channels: Therapeutic Targets for Brain Disorders. *Front. Cell. Neurosci.* **13**, 265.
- Nuriel, T., Angulo, S.L., Khan, U., Ashok, A., Chen, Q., Figueroa, H.Y., Emrani, S., Liu, L., Herman, M., Barrett, G., et al. (2017). Neuronal hyperactivity due to loss of inhibitory tone in APOE4 mice lacking Alzheimer's disease-like pathology. *Nat. Commun.* **8**, 1464.
- O'Brien, J.L., O'Keefe, K.M., LaViolette, P.S., DeLuca, A.N., Blacker, D., Dickerson, B.C., and Sperling, R.A. (2010). Longitudinal fMRI in elderly reveals loss of hippocampal activation with clinical decline. *Neurology* **74**, 1969–1976.
- Oakley, H., Cole, S.L., Logan, S., Maus, E., Shao, P., Craft, J., Guillozet-Bongaarts, A., Ohno, M., Disterhoft, J., Van Eldik, L., et al. (2006). Intraneuronal beta-amyloid aggregates, neurodegeneration, and neuron loss in transgenic mice with five familial Alzheimer's disease mutations: potential factors in amyloid plaque formation. *J. Neurosci.* **26**, 10129–10140.
- Oda, T., Yang, Y., Uchinoumi, H., Thomas, D.D., Chen-Izu, Y., Kato, T., Yamamoto, T., Yano, M., Cornea, R.L., and Bers, D.M. (2015). Oxidation of

- ryanodine receptor (RyR) and calmodulin enhance Ca release and pathologically alter, RyR structure and calmodulin affinity. *J. Mol. Cell. Cardiol.* **85**, 240–248.
- Oo, Y.W., Gomez-Hurtado, N., Walweel, K., van Helden, D.F., Imtiaz, M.S., Knollmann, B.C., and Laver, D.R. (2015). Essential Role of Calmodulin in RyR Inhibition by Dantrolene. *Mol. Pharmacol.* **88**, 57–63.
- Oulès, B., Del Prete, D., Greco, B., Zhang, X., Lauritzen, I., Sevalle, J., Moreno, S., Paterlini-Bréchet, P., Trebak, M., Checler, F., et al. (2012). Ryanodine receptor blockade reduces amyloid- $\beta$  load and memory impairments in Tg2576 mouse model of Alzheimer disease. *J. Neurosci.* **32**, 11820–11834.
- Packer, M., Bristow, M.R., Cohn, J.N., Colucci, W.S., Fowler, M.B., Gilbert, E.M., and Shusterman, N.H.; U.S. Carvedilol Heart Failure Study Group (1996). The effect of carvedilol on morbidity and mortality in patients with chronic heart failure. *N. Engl. J. Med.* **334**, 1349–1355.
- Peng, J., Liang, G., Inan, S., Wu, Z., Joseph, D.J., Meng, Q., Peng, Y., Eckenhoff, M.F., and Wei, H. (2012). Dantrolene ameliorates cognitive decline and neuropathology in Alzheimer triple transgenic mice. *Neurosci. Lett.* **516**, 274–279.
- Peron, S., Chen, T.W., and Svoboda, K. (2015). Comprehensive imaging of cortical networks. *Curr. Opin. Neurobiol.* **32**, 115–123.
- Pologruto, T.A., Sabatini, B.L., and Svoboda, K. (2003). ScanImage: flexible software for operating laser scanning microscopes. *Biomed. Eng. Online* **2**, 13.
- Priori, S.G., and Chen, S.R. (2011). Inherited dysfunction of sarcoplasmic reticulum  $\text{Ca}^{2+}$  handling and arrhythmogenesis. *Circ. Res.* **108**, 871–883.
- Rhodes, K.J., Carroll, K.I., Sung, M.A., Doliveira, L.C., Monaghan, M.M., Burke, S.L., Strassle, B.W., Buchwalder, L., Menegola, M., Cao, J., et al. (2004). KChIPs and Kv4 alpha subunits as integral components of A-type potassium channels in mammalian brain. *J. Neurosci.* **24**, 7903–7915.
- Risher, W.C., Ustunkaya, T., Singh Alvarado, J., and Eroglu, C. (2014). Rapid Golgi analysis method for efficient and unbiased classification of dendritic spines. *PLoS ONE* **9**, e107591.
- Rosen, R.F., Tomidokoro, Y., Ghiso, J.A., and Walker, L.C. (2010). SDS-PAGE/immunoblot detection of Abeta multimers in human cortical tissue homogenates using antigen-epitope retrieval. *J. Vis. Exp.* (38), 1916.
- Rybalchenko, V., Hwang, S.Y., Rybalchenko, N., and Koulen, P. (2008). The cytosolic N-terminus of presenilin-1 potentiates mouse ryanodine receptor single channel activity. *Int. J. Biochem. Cell Biol.* **40**, 84–97.
- Sandler, V.M., and Barbara, J.G. (1999). Calcium-induced calcium release contributes to action potential-evoked calcium transients in hippocampal CA1 pyramidal neurons. *J. Neurosci.* **19**, 4325–4336.
- SanMartín, C.D., Veloso, P., Adasme, T., Lobos, P., Bruna, B., Galaz, J., García, A., Hartel, S., Hidalgo, C., and Paula-Lima, A.C. (2017). RyR2-Mediated  $\text{Ca}^{2+}$  Release and Mitochondrial ROS Generation Partake in the Synaptic Dysfunction Caused by Amyloid  $\beta$  Peptide Oligomers. *Front. Mol. Neurosci.* **10**, 115.
- Sato, T.R., Gray, N.W., Mainen, Z.F., and Svoboda, K. (2007). The functional microarchitecture of the mouse barrel cortex. *PLoS Biol.* **5**, e189.
- Scala, F., Fusco, S., Ripoli, C., Piacentini, R., Li Puma, D.D., Spinelli, M., Laezza, F., Grassi, C., and D'Ascenzo, M. (2015). Intraneuronal A $\beta$  accumulation induces hippocampal neuron hyperexcitability through A-type K(+) current inhibition mediated by activation of caspases and GSK-3. *Neurobiol. Aging* **36**, 886–900.
- Seródio, P., and Rudy, B. (1998). Differential expression of Kv4 K+ channel subunits mediating subthreshold transient K+ (A-type) currents in rat brain. *J. Neurophysiol.* **79**, 1081–1091.
- Sevigny, J., Chiao, P., Bussière, T., Weinreb, P.H., Williams, L., Maier, M., Dunstan, R., Salloway, S., Chen, T., Ling, Y., et al. (2016). The antibody aducanumab reduces A $\beta$  plaques in Alzheimer's disease. *Nature* **537**, 50–56.
- Šišková, Z., Justus, D., Kaneko, H., Friedrichs, D., Henneberg, N., Beutel, T., Pitsch, J., Schoch, S., Becker, A., von der Kammer, H., and Remy, S. (2014). Dendritic structural degeneration is functionally linked to cellular hyperexcitability in a mouse model of Alzheimer's disease. *Neuron* **84**, 1023–1033.
- Smith, I.F., Hitt, B., Green, K.N., Oddo, S., and LaFerla, F.M. (2005). Enhanced caffeine-induced  $\text{Ca}^{2+}$  release in the 3XTg-AD mouse model of Alzheimer's disease. *J. Neurochem.* **94**, 1711–1718.
- Stargardt, A., Swaab, D.F., and Bossers, K. (2015). Storm before the quiet: neuronal hyperactivity and A $\beta$  in the presymptomatic stages of Alzheimer's disease. *Neurobiol. Aging* **36**, 1–11.
- Stoschitzky, K., Koshucharova, G., Lercher, P., Maier, R., Sakotnik, A., Klein, W., Liebmann, P.M., and Lindner, W. (2001). Stereoselective effects of (R)- and (S)-carvedilol in humans. *Chirality* **13**, 342–346.
- Sun, W., Maffie, J.K., Lin, L., Petralia, R.S., Rudy, B., and Hoffman, D.A. (2011). DPP6 establishes the A-type K(+) current gradient critical for the regulation of dendritic excitability in CA1 hippocampal neurons. *Neuron* **71**, 1102–1115.
- Takano, T., Han, X., Deane, R., Zlokovic, B., and Nedergaard, M. (2007). Two-photon imaging of astrocytic  $\text{Ca}^{2+}$  signaling and the microvasculature in experimental mice models of Alzheimer's disease. *Ann. N Y Acad. Sci.* **1097**, 40–50.
- Takekuma, H., Komazaki, S., Hirose, K., Nishi, M., Noda, T., and Iino, M. (1998). Embryonic lethality and abnormal cardiac myocytes in mice lacking ryanodine receptor type 2. *EMBO J.* **17**, 3309–3316.
- Tamagnini, F., Novelia, J., Kerrigan, T.L., Brown, J.T., Tsaneva-Atanasova, K., and Randall, A.D. (2015). Altered intrinsic excitability of hippocampal CA1 pyramidal neurons in aged PDAPP mice. *Front. Cell. Neurosci.* **9**, 372.
- Ting, J.T., Daigle, T.L., Chen, Q., and Feng, G. (2014). Acute brain slice methods for adult and aging animals: application of targeted patch clamp analysis and optogenetics. *Methods Mol. Biol.* **1183**, 221–242.
- Ting, J.T., Lee, B.R., Chong, P., Soler-Llavina, G., Cobbs, C., Koch, C., Zeng, H., and Lein, E. (2018). Preparation of Acute Brain Slices Using an Optimized N-Methyl-D-glucamine Protective Recovery Method. *J. Vis. Exp.* (132), 53825.
- Uttli, R., Boitnott, J.K., and Zimmerman, H.J. (1977). Dantrolene-associated hepatic injury. Incidence and character. *Gastroenterology* **72**, 610–616.
- van de Vrede, Y., Fossier, P., Baux, G., Joels, M., and Chameau, P. (2007). Control of IsAHP in mouse hippocampus CA1 pyramidal neurons by RyR3-mediated calcium-induced calcium release. *Pflugers Arch.* **455**, 297–308.
- van Zwieten, P.A. (1993). Pharmacodynamic profile of carvedilol. *Cardiology* **82** (Suppl 3), 19–23.
- Varga, A.W., Yuan, L.L., Anderson, A.E., Schrader, L.A., Wu, G.Y., Gatchel, J.R., Johnston, D., and Sweatt, J.D. (2004). Calcium-calmodulin-dependent kinase II modulates Kv4.2 channel expression and upregulates neuronal A-type potassium currents. *J. Neurosci.* **24**, 3643–3654.
- Waring, J.F., Anderson, D.J., Kroeger, P.E., Li, J., Chen, S.P., Hooker, B.A., Gopalakrishnan, M., and Briggs, C.A. (2012). Gene Expression Changes Related to Synaptic Deficits in the Tg2576 Mouse Model of Alzheimer's Disease. *J. Drug Metab. Toxicol.* **3**, 1000115.
- Wu, B., Yamaguchi, H., Lai, F.A., and Shen, J. (2013). Presenilins regulate calcium homeostasis and presynaptic function via ryanodine receptors in hippocampal neurons. *Proc. Natl. Acad. Sci. USA* **110**, 15091–15096.
- Wu, Z., Yang, B., Liu, C., Liang, G., Eckenhoff, M.F., Liu, W., Pickup, S., Meng, Q., Tian, Y., Li, S., and Wei, H. (2015). Long-term dantrolene treatment reduced intraneuronal amyloid in aged Alzheimer triple transgenic mice. *Alzheimer Dis. Assoc. Disord.* **29**, 184–191.
- Xiong, H., Kovacs, I., and Zhang, Z. (2004). Differential distribution of KChIPs mRNAs in adult mouse brain. *Brain Res. Mol. Brain Res.* **128**, 103–111.
- Xu, J., Kang, N., Jiang, L., Nedergaard, M., and Kang, J. (2005). Activity-dependent long-term potentiation of intrinsic excitability in hippocampal CA1 pyramidal neurons. *J. Neurosci.* **25**, 1750–1760.
- Yamamoto, K., Tanei, Z.I., Hashimoto, T., Wakabayashi, T., Okuno, H., Naka, Y., Yizhar, O., Fenno, L.E., Fukayama, M., Bito, H., et al. (2015). Chronic optogenetic activation augments a $\beta$  pathology in a mouse model of Alzheimer disease. *Cell Rep.* **11**, 859–865.
- Yang, E.J., Mahmood, U., Kim, H., Choi, M., Choi, Y., Lee, J.P., Cho, J.Y., Hyun, J.W., Kim, Y.S., Chang, M.J., and Kim, H.S. (2018). Phloroglucinol ameliorates cognitive impairments by reducing the amyloid  $\beta$  peptide burden and



- pro-inflammatory cytokines in the hippocampus of 5XFAD mice. *Free Radic. Biol. Med.* *126*, 221–234.
- Zhang, H., Sun, S., Herreman, A., De Strooper, B., and Bezprozvany, I. (2010). Role of presenilins in neuronal calcium homeostasis. *J. Neurosci.* *30*, 8566–8580.
- Zhang, J., Zhou, Q., Smith, C.D., Chen, H., Tan, Z., Chen, B., Nani, A., Wu, G., Song, L.S., Fill, M., et al. (2015). Non- $\beta$ -blocking R-carvedilol enantiomer suppresses  $Ca^{2+}$  waves and stress-induced ventricular tachyarrhythmia without lowering heart rate or blood pressure. *Biochem. J.* *470*, 233–242.
- Zhao, F., Li, P., Chen, S.R., Louis, C.F., and Fruen, B.R. (2001). Dantrolene inhibition of ryanodine receptor  $Ca^{2+}$  release channels. Molecular mechanism and isoform selectivity. *J. Biol. Chem.* *276*, 13810–13816.
- Zhao, X., Weisleder, N., Han, X., Pan, Z., Parness, J., Brotto, M., and Ma, J. (2006). Azumolene inhibits a component of store-operated calcium entry coupled to the skeletal muscle ryanodine receptor. *J. Biol. Chem.* *281*, 33477–33486.
- Zhao, Q.R., Lu, J.M., Yao, J.J., Zhang, Z.Y., Ling, C., and Mei, Y.A. (2015). Neuritin reverses deficits in murine novel object associative recognition memory caused by exposure to extremely low-frequency (50 Hz) electromagnetic fields. *Sci. Rep.* *5*, 11768.
- Zhou, Q., Xiao, J., Jiang, D., Wang, R., Vembaiyan, K., Wang, A., Smith, C.D., Xie, C., Chen, W., Zhang, J., et al. (2011). Carvedilol and its new analogs suppress arrhythmogenic store overload-induced  $Ca^{2+}$  release. *Nat. Med.* *17*, 1003–1009.
- Zott, B., Simon, M.M., Hong, W., Unger, F., Chen-Engerer, H.J., Frosch, M.P., Sakmann, B., Walsh, D.M., and Konnerth, A. (2019). A vicious cycle of  $\beta$  amyloid-dependent neuronal hyperactivation. *Science* *365*, 559–565.

STAR★METHODS

KEY RESOURCES TABLE

| REAGENT or RESOURCE                                  | SOURCE                                 | IDENTIFIER                                                                                                  |
|------------------------------------------------------|----------------------------------------|-------------------------------------------------------------------------------------------------------------|
| <b>Antibodies</b>                                    |                                        |                                                                                                             |
| Rabbit polyclonal anti-Kv4.2                         | Abcam                                  | Cat# ab16719; RRID: AB_443443                                                                               |
| Rabbit polyclonal anti-Rab4                          | Cell Signaling Technology              | Cat# 2167; RRID: AB_2253579                                                                                 |
| Rabbit monoclonal anti-β-Amyloid                     | Cell Signaling Technology              | Cat# 8243; RRID: AB_2797642                                                                                 |
| Mouse monoclonal anti-β-Amyloid                      | Biolegend                              | Cat# 803001; RRID: AB_2564653                                                                               |
| Mouse monoclonal anti-β-Actin                        | Sigma-Aldrich                          | Cat# A5316; RRID: AB_476743                                                                                 |
| HRP Goat anti-Rabbit IgG (H+L)                       | Thermo Fisher Scientific               | Cat# 31460; RRID: AB_228341                                                                                 |
| HRP Goat anti-Mouse IgG (H+L)                        | Thermo Fisher Scientific               | Cat# 31430; RRID: AB_228307                                                                                 |
| Biotinylated Goat anti-Rabbit IgG                    | Vector Laboratories                    | Cat# BA-1000; RRID: AB_2313606                                                                              |
| <b>Chemicals, Peptides, and Recombinant Proteins</b> |                                        |                                                                                                             |
| (R)-(+)-carvedilol                                   | <a href="#">Zhang et al., 2015</a>     | N/A                                                                                                         |
| D(-)-2-Amino-5-phosphonopentanoic acid               | Sigma-Aldrich                          | Cat# A8054; CAS# 79055-68-8                                                                                 |
| 6,7-dinitroquinoxaline-2,3-dione                     | Sigma-Aldrich                          | Cat# D0540; CAS# 2379-57-9                                                                                  |
| Picrotoxin                                           | TOCRIS                                 | Cat# 1128; CAS# 124-87-8                                                                                    |
| Tetrodotoxin citrate                                 | Abcam                                  | Cat# ab 120055; CAS# 18660-81-6                                                                             |
| Tetraethylammonium chloride                          | Sigma-Aldrich                          | Cat# T2265; CAS# 56-34-8                                                                                    |
| NS5806                                               | Sigma-Aldrich                          | Cat# N2540; CAS# 426834-69-7                                                                                |
| <b>Critical Commercial Assays</b>                    |                                        |                                                                                                             |
| Premium Grade Sulfo NHS-SS-Biotin                    | Pierce                                 | Cat# PG82077                                                                                                |
| Streptavidin Agarose                                 | Pierce                                 | Cat# 20349                                                                                                  |
| FD Cresyl Violet Solution                            | FD NeuroTechnologies                   | Cat# PS102-01                                                                                               |
| FD Rapid GolgiStain Kit                              | FD NeuroTechnologies                   | Cat# PK401                                                                                                  |
| <b>Experimental Models: Cell Lines</b>               |                                        |                                                                                                             |
| Flp-In T-Rex HEK293 cell                             | Invitrogen                             | Cat# R78007; RRID: CVCL_U427                                                                                |
| RyR2 WT HEK293 cell line                             | <a href="#">Jiang et al., 2004</a>     | N/A                                                                                                         |
| RyR2 E4872Q HEK293 cell line                         | <a href="#">Chen et al., 2014</a>      | N/A                                                                                                         |
| <b>Experimental Models: Organisms/Strains</b>        |                                        |                                                                                                             |
| Mouse: 5xFAD <sup>+/-</sup>                          | The Jackson Laboratory                 | MMRRC Stock No: 34848-JAX                                                                                   |
| Mouse: RyR2 E4872Q <sup>+/-</sup>                    | <a href="#">Chen et al., 2014</a>      | N/A                                                                                                         |
| Mouse: <i>Thy1</i> -GCaMP6f <sup>+/-</sup>           | The Jackson Laboratory                 | Stock No: 025393                                                                                            |
| <b>Recombinant DNA</b>                               |                                        |                                                                                                             |
| Plasmid: Kv4.2                                       | This paper                             | N/A                                                                                                         |
| Plasmid: EGFP                                        | This paper                             | N/A                                                                                                         |
| Plasmid: KChIP4                                      | This paper                             | N/A                                                                                                         |
| Plasmid: PS1                                         | This paper                             | N/A                                                                                                         |
| Plasmid: PS1 M146L                                   | This paper                             | N/A                                                                                                         |
| Plasmid: PS1 L286V                                   | This paper                             | N/A                                                                                                         |
| <b>Software and Algorithms</b>                       |                                        |                                                                                                             |
| pCLAMP 10.6                                          | Molecular Devices                      | <a href="https://www.moleculardevices.com/">https://www.moleculardevices.com/</a>                           |
| OriginPro 9.0                                        | OriginLab                              | <a href="https://www.originlab.com/">https://www.originlab.com/</a>                                         |
| MATLAB                                               | MathWorks                              | <a href="https://www.mathworks.com/products/matlab.html">https://www.mathworks.com/products/matlab.html</a> |
| ScanImage 3.8.1                                      | <a href="#">Pologruto et al., 2003</a> | RRID: SCR_014307                                                                                            |
| ImageJ                                               |                                        | <a href="https://imagej.nih.gov/ij">https://imagej.nih.gov/ij</a>                                           |

(Continued on next page)

**Continued**

| REAGENT or RESOURCE | SOURCE              | IDENTIFIER                                                        |
|---------------------|---------------------|-------------------------------------------------------------------|
| NeuroSeg            | Guan et al., 2018   | N/A                                                               |
| RECONSTRUCT         | Risher et al., 2014 | N/A                                                               |
| Graphpad Prism 7    | Graphpad Software   | <a href="https://www.graphpad.com/">https://www.graphpad.com/</a> |

**RESOURCE AVAILABILITY**

**Lead Contact**

Further information and requests for resources and reagents should be directed to and will be fulfilled by the Lead Contact, S. R. Wayne Chen ([swchen@ucalgary.ca](mailto:swchen@ucalgary.ca)).

**Materials Availability**

All materials will be made available upon reasonable request.

**Data and Code Availability**

All data generated in this study will be available upon reasonable request.

**EXPERIMENTAL MODEL AND SUBJECT DETAILS**

**Mouse models**

All animal studies were approved by the Institutional Animal Care and Use Committees at the University of Calgary and were performed in accordance with US National Institutes of Health guidelines. Adult genetically engineered mice, 5xFAD<sup>+/-</sup> (Oakley et al., 2006), RyR2-E4872Q<sup>+/-</sup> (EQ<sup>+/-</sup>) (Chen et al., 2014), 5xFAD<sup>+/-</sup>/RyR2-E4872Q<sup>+/-</sup> (5xFAD<sup>+/-</sup>/EQ<sup>+/-</sup>), and WT littermates of both sexes were used. All animal models were housed in the mouse facility of Cumming School of Medicine, University of Calgary. Mice were maintained in a 129E background and housed on a 12hr light/dark cycle with *ad libitum* access to food and water. *R*-carvedilol (*R*-CV) (3.2 mg/kg/day), carvedilol (racemic mixture) (3.2 mg/kg/day), and vehicle control (DMSO) were delivered to 5xFAD<sup>+/-</sup> mice in drinking water for one month, starting at different ages before (2-3 months old) or after (3-4 months old) the occurrence of AD pathologies (Oakley et al., 2006). To assess the effects of genetically and pharmacologically limiting RyR2 open time on the prevention and rescue of AD deficits in different stages (early, moderate, and late) of AD progression, animals at different ages (from 2-15 months) were used. As reported (Oakley et al., 2006), there is an age-dependence of AD progression in the 5xFAD<sup>+/-</sup> mice. However, we did not observe sex-dependent differences in AD progression in these mice. As shown previously, only heterozygous RyR2-E4872Q<sup>+/-</sup> mutant mice were produced as homozygous E4872Q<sup>+/+</sup> mutation is embryonic lethal (Chen et al., 2014). Functional RyR2s are tetrameric channels formed by 4 RyR2 monomers. The heterozygous E4872Q<sup>+/-</sup> mutant mice (harboring one WT allele and one E4872Q mutant allele) will produce a mixture of homo- and hetero-tetrameric channels that contain the WT, E4872Q mutant, or both WT/E4872Q mutant monomers. Thus, the RyR2-E4872Q mutation can exert its negative impact not only on the function of the E4872Q homo-tetramers, but also on the function of the WT monomer in the WT/E4872Q hetero-tetrameric channels. For 2-photon Ca<sup>2+</sup> imaging experiments, 5xFAD, RyR2 WT, and RyR2 mutant mice were cross-bred with the heterozygous *Thy1*-GCaMP6f transgenic mice (Chen et al., 2012, 2013) (GP5.17, JAX 025393) to express the GCaMP6f Ca<sup>2+</sup> sensing probe (driven by the *Thy1* promoter) in hippocampal neurons in each of the genotypes used.

**Cell lines**

The Flp-In T-REx HEK293 cell line was obtained from Invitrogen. HEK293 cell lines expressing RyR2 WT or the RyR2 E4872Q mutation were generated using the Flp-In T-Rex HEK293 cell line. HEK293 cell lines were cultured in Dulbecco's Modified Eagle Medium (GIBCO) supplemented with 10% fetal bovine serum (GIBCO), 100 units/ml penicillin and 100 μg/ml streptomycin (GIBCO), 4 mM L-glutamin (GIBCO) and 0.1 mM MEM Non-Essential Amino Acids Solution (GIBCO). All cell lines were cultivated in a humidified incubator with 5% CO<sub>2</sub> at 37°C and were tested negative for mycoplasma contamination.

**METHOD DETAILS**

**Acute brain slice preparation**

Acute brain slices were prepared according to the published procedures with some modifications (Ting et al., 2014, 2018). Briefly, mice were anesthetized with isoflurane (5%) and perfused through the heart with 20 mL ice-cold, carbogenated (95% O<sub>2</sub>, 5% CO<sub>2</sub>), N-methyl-D-glucamine (NMDG)-cutting solution, containing NMDG, 93 mM; KCl, 2.5 mM; NaH<sub>2</sub>PO<sub>4</sub>, 1.2 mM; NaHCO<sub>3</sub>, 30 mM; HEPES, 20 mM; glucose, 25 mM; thiourea, 2 mM; Na-ascorbate, 5 mM; Na-pyruvate, 3 mM; CaCl<sub>2</sub>·2H<sub>2</sub>O, 0.5 mM,

and  $\text{MgSO}_4 \cdot 7\text{H}_2\text{O}$ , 10 mM, pH to 7.3–7.4 with HCl. Brains were rapidly removed and placed in the ice-cold, carbogenated cutting solution for 30 s. Transverse hippocampal slices (260 or 300  $\mu\text{m}$  thick) were prepared using a Vibratome (VT1200S, Leica) and then transferred to a homemade incubation chamber at 32°C with the carbogenated cutting solution. We then performed  $\text{Na}^+$  spike-in schedule according to the mouse age. The slices were then kept in HEPES containing aCSF (NaCl, 92 mM; KCl, 2.5 mM;  $\text{NaH}_2\text{PO}_4$ , 1.25 mM;  $\text{NaHCO}_3$ , 30 mM; HEPES, 20 mM; glucose, 25 mM; thiourea, 2 mM; Na-ascorbate, 5 mM; Na-pyruvate, 3 mM;  $\text{CaCl}_2 \cdot 2\text{H}_2\text{O}$ , 2 mM, and  $\text{MgSO}_4 \cdot 7\text{H}_2\text{O}$ , 2 mM, pH to 7.3–7.4 with NaOH) at room temperature for at least 60 min before use.

### Whole-cell patch-clamp recordings

For whole-cell patch-clamp recordings, slices were transferred to a submerged recording chamber perfused with carbogenated external solutions at a flow rate of 4–6 mL/min at room temperature (23 °C). Action potentials (APs) were measured in hippocampal CA1 pyramidal neurons in transverse hippocampal slices (260  $\mu\text{m}$ ) from all genotypes of 3–4 months old mice using whole-cell patch-clamp with an Axopatch 700B amplifier (Axon Instruments). We focused on hippocampal CA1 pyramidal neurons as they play a critical role in neuronal activity, learning and memory (Brager and Johnston, 2007; Kerrigan et al., 2014; Tamagnini et al., 2015; Xu et al., 2005). We did not measure membrane potentials in 5–6 months old or older neurons as aged neurons are difficult to patch. AP firing was recorded in an external solution (NaCl, 124 mM; KCl, 2.5 mM;  $\text{NaH}_2\text{PO}_4$ , 1.25 mM;  $\text{NaHCO}_3$ , 24 mM; HEPES, 5 mM; glucose, 12.5 mM;  $\text{MgCl}_2$ , 2 mM; and  $\text{CaCl}_2$ , 2 mM; pH 7.4 adjusted with NaOH) and soft-glass recording pipettes (Sutter Instruments; Novato CA) filled with an internal solution (potassium gluconate, 135 mM, KCl, 10 mM, HEPES, 10 mM,  $\text{CaCl}_2$ , 1 mM,  $\text{MgCl}_2$ , 1 mM, EGTA, 10 mM, ATP, 1 mM, GTP, 0.1 mM, and pH 7.3 adjusted with KOH). The pipette resistance was 4–6 M $\Omega$  after filling with internal solution. For spontaneous AP recording, cells were held at  $-70$  mV and recorded for 3 min. For the measurement of current-injection triggered APs, 0.05 mM 2-amino-5-phosphonovaleric acid (APV), 0.02 mM 6,7-dinitroquinoxaline-2,3-dione (DNQX) and 0.1 mM picrotoxin were added to the external solution to block synaptic activity. APs were initiated by injecting current from 0 to 300 pA for 1 s in 10 pA steps at 10 s intervals. For testing the Kv4 channel agonist NS5806, APs were measured before and 15 min after perfusion of 10  $\mu\text{M}$  NS5806 in the external solution. For recording of spontaneous excitatory post-synaptic currents (sEPSCs), same external and internal solutions for AP recording were used. Picrotoxin (0.1 mM) was added to the external solution to block inhibitory current. CA1 neuron were held at  $-70$  mV for 2 min.

Previous studies used whole-cell patch clamp recordings at the soma of CA1 pyramidal cells to measure the whole-cell A-type  $\text{K}^+$  current (Chen, 2005; Good et al., 1996; Hall et al., 2015; Scala et al., 2015). To make comparisons to earlier studies, we employed the same approach. Briefly, whole-cell A-type  $\text{K}^+$  current ( $I_A$ ) was elicited by depolarizing pulses to +40 mV from a holding potential of  $-100$  mV in the presence of 20 mM tetraethylammonium (TEA) and 100 nM tetrodotoxin (TTX). In steady-state activation experiments, membrane potential was held at  $-100$  mV, and  $I_A$  was evoked by a 200-ms depolarizing pulse from a first pulse potential of  $-80$  mV to +80 mV in 10-mV steps at 10 s intervals. Data were analyzed using the equation  $G_K = I_K / (V_m - V_{rev})$ , where  $G_K$  is the membrane  $\text{K}^+$  conductance,  $V_m$  is the membrane potential, and  $V_{rev}$  is the reversal potential for  $\text{K}^+$ . To study steady-state inactivation of  $I_A$ , currents were elicited using 1 s conditioning pre-pulses from  $-110$  mV to 0 mV before a 200-ms test pulse of +50 mV. After normalizing each current amplitude to the maximal current, amplitude obtained from the  $-110$  mV pre-pulse was used as a function of the conditioning pre-pulse potential and fitted with the function  $I_A / I_{A - \max} = 1 / (1 + \exp((V_{m1/2} - V_m) / k))$ , from which, an inactivation curve of  $I_A$  was obtained, and the  $V_H$  value (the voltage at which the current amplitude was half-inactivated) was calculated. Note that in other studies and ours, the A-type  $\text{K}^+$  current was measured by performing whole-cell current recordings at the soma of CA1 pyramidal neurons to assess the role of somatic whole-cell A-type  $\text{K}^+$  current in somatic excitability and spike output. Given the well-known somatodendritic gradient of A-type  $\text{K}^+$  current density distribution (Hoffman et al., 1997), the use of somatic whole-cell recordings would limit our ability to identify changes in the A-type  $\text{K}^+$  current density distribution over the soma-dendritic axis. Further studies will be needed to define the contribution of dendritic A-type  $\text{K}^+$  current to AD-associated neuronal hyperactivity and RyR2-mediated control of neuronal excitability. Nevertheless, somatic whole-cell recordings still provide valuable information on the magnitude of somatic A-type  $\text{K}^+$  current, an important determinant of somatic excitability.

For HEK293 cell experiments, HEK293 cell lines were maintained as previously described (Jiang et al., 2004) and transiently transfected with cDNAs of Kv4.2 and KChIP4 together with cDNA encoding for GFP to identify cells successfully transfected. 12–16 h before recording, tetracycline was added to culture media to induce the expression of RyR2 WT or RyR2 E4872Q mutant.  $I_A$  was recorded with the same protocols as described above. Prior to  $I_A$  recording, the culture medium was replaced with a bath solution (NaCl, 125 mM; KCl, 2.5 mM; HEPES, 10 mM;  $\text{MgCl}_2$ , 1 mM; glucose, 10 mM; TEA, 20 mM; pH 7.4 adjusted with NaOH).

For recording the afterhyperpolarization current ( $I_{AHP}$ ), brain slices were perfused with the carbogenated aCSF and pipettes were filled with  $I_{AHP}$  inner solution (KMeSO<sub>3</sub>, 130 mM; EGTA, 0.1 mM; HEPES, 10 mM; NaCl, 7 mM;  $\text{MgCl}_2$ , 0.3 mM; di-tris-creatine, 5 mM; Tris-ATP, 2 mM and Na-GTP, 0.5 mM, pH 7.3 with KOH).  $I_{AHP}$  was evoked by a 100 ms depolarizing voltage step to +60 mV from a holding potential of  $-85$  mV. Medium ( $I_{MAHP}$ ) and slow ( $I_{SAHP}$ ) amplitudes were measured at the peak of the current and 1 s after the end of the depolarizing pulse, respectively. All cells had a resting membrane potential more hyperpolarized than  $-60$  mV, leak current smaller than 100 pA, and an input resistance of 150–350 M $\Omega$ . Input resistance was determined from a  $-5$  mV (100 ms) hyperpolarizing pulse applied at the beginning of each sweep. Access resistance was 80% electronically compensated and stable at  $< 20$  M $\Omega$ .

### **In vivo 2-photon $\text{Ca}^{2+}$ imaging of CA1 neurons**

To assess the impact of genetically limiting RyR2 open time on AD progression, we crossbred heterozygous 5xFAD<sup>+/-</sup> mice that overexpress 5 human familial AD mutations (Oakley et al., 2006) with heterozygous RyR2 mutant mice harboring the RyR2 mutation E4872Q<sup>+/-</sup> that markedly shortens RyR2 open time (Chen et al., 2014). This breeding generated four genotypes: 5xFAD<sup>+/-</sup>, 5xFAD<sup>+/-</sup>/E4872Q<sup>+/-</sup> (5xFAD<sup>+/-</sup>/EQ<sup>+/-</sup>), E4872Q<sup>+/-</sup> (EQ<sup>+/-</sup>), and wild-type (WT). To determine whether limiting RyR2 open time can suppress AD-associated neuronal hyperactivity *in vivo* as reported previously (Busche et al., 2008, 2012; Delekate et al., 2014; Eichhoff and Garaschuk, 2011; Kim et al., 2016; Takano et al., 2007; Zott et al., 2019), we then crossed the double heterozygous 5xFAD<sup>+/-</sup>/E4872Q<sup>+/-</sup> mice with the heterozygous *Thy-1* GCaMP6f<sup>+/-</sup> transgenic mice (GP5.17, JAX 025393) to introduce the GCaMP6f<sup>+/-</sup> transgene into each of the four genotypes (driven by the *Thy1* promoter). Note GCaMP6f is a fast, ultrasensitive  $\text{Ca}^{2+}$  sensing protein that is capable of detecting individual action potentials in neurons with high reliability (Chen et al., 2013; Dana et al., 2014; Peron et al., 2015). Also, in the hippocampal CA1 region of the *Thy-1* GCaMP6f<sup>+/-</sup> transgenic mice, GCaMP6f is predominantly expressed in pyramidal neurons (not in GABAergic neurons or glial cells). We performed *in vivo* two-photon imaging of GCaMP6f-expressing CA1 pyramidal neurons in each of the four genotypes to monitor spontaneous  $\text{Ca}^{2+}$  transients. These spontaneous  $\text{Ca}^{2+}$  transients are widely used to assess the spontaneous neuronal activity of cell populations (Busche et al., 2008, 2012; Chen et al., 2013; Dana et al., 2014; Kerr et al., 2005; Peron et al., 2015; Sato et al., 2007; Zott et al., 2019).

Neuronal hyperactivity has been reported in anesthetized AD model mice *in vivo* using two-photon  $\text{Ca}^{2+}$  imaging (Busche et al., 2008, 2012, 2019; Lerdkrai et al., 2018). To be able to compare our data to this considerable body of existing literature, we employed the same approach described originally by Busche et al. and used by others in the field (Busche et al., 2008, 2012; Delekate et al., 2014; Eichhoff and Garaschuk, 2011; Kim et al., 2016; Takano et al., 2007; Zott et al., 2019). Craniotomy was performed according to the protocol reported previously (Busche, 2018; Busche et al., 2008, 2012) with some modifications. Briefly, mice at different ages were anesthetized with 1%–2% isoflurane (vol/vol in pure oxygen), and placed onto a heating plate (Homeothermic Monitor, Harvard Apparatus). The body temperature was monitored and controlled at 36.5–37.5°C during the entire surgery and imaging procedure. After the removal of the skin, the skull was rinsed with artificial cerebral spinal fluid (aCSF: NaCl, 125 mM; KCl, 4.5 mM; NaH<sub>2</sub>PO<sub>4</sub>, 1.25 mM; NaHCO<sub>3</sub>, 26 mM; glucose, 20 mM; CaCl<sub>2</sub>·2H<sub>2</sub>O, 2 mM, and MgCl<sub>2</sub>, 1 mM, pH to 7.3–7.4 with NaOH) and dried with cotton tips. A custom-made plastic recording chamber was glued to the skull with dental cement. The chamber was filled and kept perfusing with warm (37°C) aCSF. The stereotactic coordinates of the hippocampus were located according to the mouse brain atlas. A 1–2 mm wide cranial window centered 2.5 mm posterior to bregma and 2.2 mm lateral to the midline was opened in the skull with a dental drill. The dura was removed with fine forceps and the cortical tissue above the hippocampus was carefully removed by aspiration. When the dorsal surface of the hippocampus was seen, the aspiration was stopped and the imaging area was thoroughly irrigated with warm aCSF for about 30 min to make sure no bleeding and the blood was removed as much as possible. The craniotomy was filled with agarose (2%–3%) and stabilized with a cover glass. Then, the animal was moved to the recording platform, and the isoflurane was gradually reduced to 0.5%–0.8%. Besides the core body temperature, the respiratory and pulse rate were continuously monitored (MouseOx plus, STARR Life Science Corp.).

*In vivo* two-photon recordings were made using a custom-built two-photon microscope fed by a Ti:Sapph laser (Ultra II, ~4W average power, 670–1080 nm, Coherent), using a water dipping Nikon objective lens (16x, NA 0.8) and Hamamatsu GaAsP PMT detectors. Image data were acquired using MATLAB, running on an open source scanning microscope control software named ScanImage (version 3.8.1, Howard Hughes Medical Institute/Janelia Farms, RRID:SCR\_014307) (Pologruto et al., 2003). Imaging was performed at an excitation wavelength of 920 nm for GCaMP6f and fluorescence was captured using a 560nm secondary dichroic and a 525–40nm bandpass emission filter (Chroma Technologies). Time-series images were acquired at 15.63 Hz with a pixel density of 256 × 256 and a field of view size of ~110 μm. For each view, spontaneous  $\text{Ca}^{2+}$  transients of hippocampal CA1 neurons were recorded for 5–10 min.

Image analyses were performed offline using ImageJ (<https://imagej.nih.gov/ij>) and an open-source MATLAB program NeuroSeg (Guan et al., 2018). First, images were stabilized with ImageJ to reduce the x-y vibration, then regions of interest (ROI) were drawn around individual somata and the relative fluorescence change ( $\Delta F/F$ ) versus time traces for each ROI was generated using NeuroSeg.  $\text{Ca}^{2+}$  transients were identified as changes in  $\Delta F/F$  that were three times larger than the standard deviation of the noise band. We classified all recorded neurons based on their activity rates as silent (0–0.2 transients/min), normal (0.2–20 transients/min), and hyperactive ( $\geq 20$  transients/min) neurons following the definitions by Busche and colleagues (Busche, 2018; Busche et al., 2008, 2012). Note that analyses of frequency distributions were performed using cells pooled from all animals, while analyses of mean frequency and fraction of silent, normal, and hyperactive cells were based on data from individual animals.

### **Ex vivo 2-photon $\text{Ca}^{2+}$ imaging of CA1 neurons**

*Ex vivo* two-photon  $\text{Ca}^{2+}$  imaging was carried out as described previously with some modifications (Chen-Engerer et al., 2019). 5xFAD, RyR2 WT, and RyR2 mutant mice were cross-bred with the heterozygous *Thy1*-GCaMP6f transgenic mice (Chen et al., 2012, 2013) (GP5.17, JAX 025393) to express the GCaMP6f  $\text{Ca}^{2+}$  sensing probe (driven by the *Thy1* promoter) in hippocampal neurons in each of the genotypes used. Transverse hippocampal slices (260 μm) were prepared as described above and kept in the carbogenated HEPES containing aCSF for at least 60 min before recording. Slices were then moved to a recording chamber containing carbogenated external solution (NaCl, 124 mM; KCl, 2.5 mM; NaH<sub>2</sub>PO<sub>4</sub>, 1.25 mM; NaHCO<sub>3</sub>, 24 mM; HEPES, 5 mM; glucose, 12.5 mM; MgCl<sub>2</sub>, 2 mM; and CaCl<sub>2</sub>, 2 mM; pH 7.4 adjusted with NaOH) and put under an up-right two-photon imaging system

(SP8 DIVE, Leica, Germany) with CHAMELEON HEAD/PSU: ULTRA (II): 80MHz (RoHS) laser (Coherent, UK). A 25x water-immersion objective with NA 0.95 (Leica, Germany) was used for imaging. Laser wavelength was set at 920 nm. Images were recorded with a resolution of 296 × 296 pixels at 16.77 fps. During recording, 0.5 μM tetrodotoxin (TTX), 0.03 mM 2-amino-5-phosphonovaleric acid (APV), 0.02 mM 6,7-dinitroquinoxaline-2,3-dione (DNQX) and 0.1 mM picrotoxin were added to the external solution. Local drug application was performed by using a glass pipette with a resistance of ~8 MΩ, which was connected to a modified pressurized perfusion system (ALA Scientific Instruments, Inc., USA). The pipette was filled with caffeine ringer solution (caffeine, 40 mM; CaCl<sub>2</sub>, 2 mM; HEPES, 10 mM; KCl, 2.5 mM; MgCl<sub>2</sub>, 1 mM; NaCl, 120 mM; NaH<sub>2</sub>PO<sub>4</sub>, 1.25 mM; pH 7.4 adjusted with NaOH). The pipette tip was placed at 15–20 μm from the soma of CA1 neuron. Caffeine (40 mM) was applied for 3 s to induce Ca<sup>2+</sup> release. The fluorescence intensity in each somatic ROI was corrected by background subtraction. A ROI immediately outside of the neuron was taken as the background. Temporal fluorescence intensity changes in ROIs were expressed as relative changes in fluorescence intensity:  $\Delta F/F = ((F - F_0)/F_0)$ .  $F_0$  is defined as baseline fluorescence, which is the fluorescence intensity before a given stimulus, and  $F$  is the fluorescence recorded over time.  $\Delta F/F$  values were calculated and plotted using NeuroSeg.

### Long-term potentiation recording

Schaffer collateral fibers were stimulated at the CA3 subfield to record field excitatory postsynaptic potentials (fEPSPs) in the CA1 stratum radiatum of transverse hippocampal slices (300 μm) from all genotypes and drug-treated mice at different ages. After recovering at room temperature for 1 h (or 2 h for brain slices from drug-treated mice), hippocampal slices were allowed to recover in the recording chamber for additional 10 min. To evaluate basal synaptic transmission, we applied different stimulation strengths (0 μA to 200 μA in steps of 20 μA) and plotted fEPSP slopes versus the current input to compare the slope of input/output (I/O) curves of fEPSP. In the experiments that followed, stimulus current was adjusted so that fEPSP stabilized at 40%–50% of maximum. Baseline was recorded for at least 20 min until the differences among fEPSP slopes were within 10%. Long-term potentiation (LTP) was induced using a tetanic high-frequency stimulation (HFS; 4 trains of 100 pulses at 100 Hz, with 20 s intervals). Synaptic responses were recorded for at least 60 min after tetanization and quantified as the slope of the evoked fEPSP as percentage of the baseline.

### Learning and memory tests

The learning and memory of mice with all genotypes were evaluated using the Morris water maze (MWM) test, the Barnes maze (BM) test, and/or the novel object recognition (NOR) test. Experiments were carried out blindly. For the MWM test, mice at different ages were trained to localize a hidden escape platform (10 × 10 cm) in a circular pool (116.84 cm in diameter, 50 cm in depth) (San Diego Instruments, CA) via distal visual cue. The platform was submerged 1–2 cm beneath the surface in water (22–24°C), which was rendered opaque by addition of milk powder. The localization of the pool in relation to visual cues was maintained constantly during the entire task. The cues were distinct in color and shape. Digital division of the tracking area (pool) into four quadrants was performed by the SMART video tracking system, Smart 3.0 (Panlab Harvard Apparatus; Barcelona Spain). The escape platform was placed in the center of the south-west quadrant for the entirety of the learning phase (4 training days) and digitally defined as target. Spatial training consisted of 4 days with 5 trials per mouse per day. Mice were released with their heads facing the pool wall at one of four entry locations (north, east, south and west) in a non-repetitive random order. Swimming was automatically video-tracked until the subject found the escape platform and remained on it ( $\geq 5$ sec), or until a maximum of 60 s. Mice that did not locate the hidden platform within the time limit of 60 s were guided to the escape platform until they spent  $\geq 10$  s on it. In between trials (inter-trial interval  $\geq 10$ min), mice were housed in heated cages to avoid performance deficits due to exhaustion or hypothermia. The latency and swimming speed to reach the escape platform were recorded for comparison. After the learning phase, memory retention was evaluated by one probe trial 24 hours after the last training session. The escape platform was removed before mice were released from the north entry point into the pool. Their swimming was video-tracked for 60 s. The area at the location of the removed hidden platform was defined as the target and the south-west quadrant the target quadrant. The percentage of time mice spent in the target quadrant (including the target) were measured for comparison.

For the BM test, the size and characteristics of the device are as follows: a 92 cm diameter platform; the platform contains 20 holes, each 5 cm in diameter, equally distributed around the platform and separated by 7.5 cm; the device stands 105 cm above the floor. In one hole there is an escape box communicated with the platform through transparent plastic tunnels arranged in such a way that they cannot be seen from the platform. Similar to the MWM test the simultaneous use of a video-monitoring system is used to obtain automated behavioral recordings. Each trial lasts 3 min per mouse, with an inter-trial interval of 15 min, with four trials per day during the acquisition phase. The first phase (habituation), consisted of placing the mouse on the center of the platform and then, turning on the bright light as an aversive stimulus. Then the mouse was gently taken to the escape hole; once in the escape chamber, the light was turned off, and the mouse was kept inside for two additional minutes. During acquisition, mice were placed on the center of the platform and the light was turned on for 3 min, the latency to find the escape hole was recorded. If the mouse did not reach the escape hole within 3 min, the experimenter placed it at the entrance of the escape hole for 1 min, and then took it back to its home-cage. This protocol continued for 4 days. On day 5, 24 h after the last training day, the probe trial was conducted. The target hole was closed. The maze was rotated so that the target hole was closed and the maze was readjusted so that the holes were in the same position as during the training days. The mouse was then placed in the middle of the maze and allowed to explore the maze as before. The mouse was removed after a 90 s. The probe trial was done in order to determine if the animal remembered where the target hole was located. The numbers of nose pokes to each hole were measured.

For the NOR test, mice were habituated for 10 min per mouse in an equally illuminated, odor-free, white, plastic box (40 × 40 × 50 cm<sup>3</sup>) embedded with fresh aspen shavings and shreds. In between each mouse trial the box was wiped with ethanol to avoid odor-induced stress. 24 hours after habituation, two identical objects were placed at equal distance to each other and the corners of the box. Each mouse was placed into the center, and allowed to move freely for 10 min. Mice were video recorded during this familiarizing phase. Side preferences was evaluated by dividing the time a mouse spent exploring one object by the time they spent at the other object. Twenty-four hours later, one of the objects was replaced by a novel object. The other object remained constant. The selection of a familiar object to be replaced was random. Each mouse was again placed into the center of the box and allowed to move freely for another 10 min while videotaped. General exploration was evaluated by determining the time spent exploring the objects. The discrimination ratio describes the time a mouse explored the novel object divided by the total time it spent exploring (novel and familiar objects). The above experiments were carried out blindly.

### Biotinylation assays

Biotinylation assays were performed according to the protocol described previously (Lin et al., 2010) with some modifications. Briefly, after 24–48 h of transfection with the Kv4.2 and KChIP4 cDNAs, transfected HEK293 cell lines expressing RyR2 WT or RyR2 E4872Q mutation were rinsed with ice-cold PBS for three times, surface proteins were biotinylated with 1.5 mg/ml sulfo-NHS-SS-biotin reagent (Pierce, Cat# PG82077) in PBS for 30 min on ice. Unbound biotin was quenched with ice-cold 50 mM glycine in PBS. Cells were lysed with ice-cold lysis buffer: 150 mM NaCl, 20 mM Tris-HCl, 1% NP40 and protease inhibitor cocktail (Roche, Cat# 4693159001), sonicated and centrifuged at 12,000 g for 10 min. Cell lysates were incubated overnight at 4°C with immobilized-Streptavidin agarose beads (Pierce, Cat# 20349), unbound proteins were removed from the beads with 3 washes in lysis buffer. The bound proteins were eluted with 2 × SDS sample buffer. Surface expressed proteins were separated by electrophoresis in 12% Tris-glycine SDS-PAGE and transferred to PVDF membranes. Western blots were probed with the following antibodies: rabbit anti-Kv4.2 (1:1000, abcam, Cat# ab 16719), rabbit anti-Rab4 (1:1000, Cell Signaling Technology, Cat# 2167), goat anti-rabbit IgG secondary antibodies conjugated with horseradish peroxidase (1:10000, ThermoFisher, Cat#31460). The bound antibodies were detected using an enhanced chemiluminescence kit from Pierce.

### Immunoblotting

Immunoblotting analysis was carried out using the method described previously (Rosen et al., 2010). Briefly, the frozen mouse brain was homogenized with ice-cold buffer, containing 50 mM Tris-HCl (pH 7.5) plus 4 μM leupeptin, 1 mM benzamide, 0.1 mM phenylmethylsulfonyl fluoride (PMSF), and 0.5 mM dithiothreitol (DTT). The homogenates were sonicated 3 times and spun at 3000xg for 5 min. The supernatants were mixed with sample buffer (sodium dodecyl sulfate (SDS), 12%; β-mercaptoethanol, 6%; DTT, 200mM; Tris-HCl, 150mM; and glycerol, 30%; pH 7.0) and heated at 95°C for 15min. Samples were subjected to Tricine/SDS polyacrylamide gel electrophoresis (15%), and were transferred onto 0.2 μm polyvinylidene difluoride (PVDF) membranes (Bio-Rad) at 100 V for 1h at 4°C. The membrane was blocked with 5% non-fat milk powder for 30min. The blocked membrane was incubated with a primary antibody (anti-Aβ (total) antibody (Cell Signaling Technology, Cat# 8243), anti-Aβ (1-42) antibody (Biolegend, Cat# 803001), or anti-β-actin (Sigma, Cat# A5316)), and then the goat anti-rabbit IgG (ThermoFisher, Cat#31460) or the goat anti-mouse IgG (ThermoFisher, Cat# 31430) secondary antibody conjugated with horseradish peroxidase (1:20000 dilution). After washing 3 times, 10 min each, the bound antibodies were detected using an enhanced chemiluminescence kit from Pierce. The band intensities were determined from its intensity profile obtained by ImageQuant LAS 4000 (GE Healthcare Life Sciences), analyzed by using the Image-J software, and normalized to that of β-actin. Note that genetically or pharmacologically limiting RyR2 open time prevents AD-related deficits without altering Aβ accumulation. This differs from previous studies showing that dantrolene (a potent RyR1) significantly reduced Aβ load (Chakroborty et al., 2012a; Oulès et al., 2012; Peng et al., 2012; Wu et al., 2015). The reason for this difference remains to be determined. Dantrolene treatment has been associated with hepatotoxicity in humans (Chan, 1990; Utili et al., 1977) and worsening AD pathologies in mice (Zhang et al., 2010). The brain expresses all three RyR isoforms. RyR1 and RyR3 are readily inhibited by dantrolene (Zhao et al., 2001), but dantrolene inhibition of RyR2 is subtle and varies with the RyR2 oxidative and modulated states (Maxwell et al., 2012; Oda et al., 2015; Zhao et al., 2001). Hence, whether dantrolene can effectively suppress RyR2 in the brain is unclear. Dantrolene by interacting with multiple targets (Oo et al., 2015; Zhao et al., 2001, 2006) may affect Aβ metabolism differently from limiting RyR2 open time.

### Immunohistochemical and Nissl staining

Mice of different ages and genotypes were anesthetized and transcardially perfused with 10% neutral buffered formalin (NBF). Whole brains were removed and post-fixed in NBF for at least 24 h. The fixed brains were then embedded in paraffin after dehydration and diaphanization. For the IHC staining, paraffin-embedded brain tissue sections (5 μm) were immersed in xylene (5 min, 3 times), rehydrated in absolute ethanol (5 min, 3 times) followed by immersion in 95%, 80% and 70% solutions of ethanol (in water) (5 min each). Antigens were reactivated by treatment with 0.01 M citrate buffer (pH 6.0) for 2 min in microwave. Slides were washed in phosphate buffered saline (PBS: NaCl, 137 mM; KCl, 2.7 mM; Na<sub>2</sub>HPO<sub>4</sub>, 10 mM; KH<sub>2</sub>PO<sub>4</sub>, 2 mM, pH 7.4) and blocked with 10% normal horse serum in PBS for 10 min, then incubated with the primary antibody, the anti-β-amyloid peptide (total) antibody (Cell Signaling Technology, Cat# 8243), for 12–16 h at 2–8°C. After washing with PBS, slides were incubated with biotinylated secondary antibody (Vector Laboratories, Cat# BA-1000) for 10 min, washed twice with PBS, and incubated with 3% H<sub>2</sub>O<sub>2</sub> for 25 min for inactivation of

endogenous peroxidase. Slides were then incubated with streptavidin–biotin–peroxidase for 30 min. Slides were covered with 3, 3'-diaminobenzidine (DAB) solution (0.06% in PBS containing 0.018% H<sub>2</sub>O<sub>2</sub>) for 1 to 5 min or until a brown precipitate could be observed. Identical conditions and reaction times were used for slides from different samples to allow comparison between immunoreactivity densities. Reaction was stopped by immersion of slides in distilled water. Counterstaining was performed with Harris hematoxylin. Coverslips were mounted with resinous mounting medium.

For the Nissl staining, paraffin-embedded brain tissue sections (5 μm) were immersed in xylene (5 min, 2 times), rehydrated in absolute ethanol (5 min, 2 times) followed by 95%, 75% and 50% solutions of ethanol in water (5 min each), then washed in distilled water for 2 times, 5 min each. Slides were stained in FD cresyl violet solution (FD Neurotechnologies, Baltimore, MD, USA) for 10 min, then, briefly rinsed in 100% ethanol and differentiated in 100% ethanol containing 0.1% glacial acetic acid for 1 min. Slides were then dehydrated in absolute ethanol (2 min, 4 times) followed by clearance in xylene (3 min, 2 times). Coverslip were mounted with resinous mounting medium.

### Single-cell Ca<sup>2+</sup> imaging of HEK293 cells

Intracellular cytosolic Ca<sup>2+</sup> changes in stable, inducible HEK293 cells expressing RyR2 WT or RyR2 E4872Q mutant, transfected with presenilin 1 (PS1) WT, PS1-M146L, PS1-L286V or control plasmid (pcDNA3) were monitored using single-cell Ca<sup>2+</sup> imaging and the fluorescent Ca<sup>2+</sup> indicator dye Fura-2 AM, as described previously (Chen et al., 2014; Jiang et al., 2004, 2005). Briefly, transfected cells grown on glass coverslips for 18–22 h after induction by 1 μg/ml tetracycline were loaded with 5 μM Fura-2 AM in KRH (Krebs-Ringer-HEPES) buffer (NaCl, 125 mM; KCl, 5 mM; KH<sub>2</sub>PO<sub>4</sub>, 1.2 mM; glucose, 6 mM; MgCl<sub>2</sub>, 1.2 mM; HEPES, 25 mM; pH 7.4) plus 0.02% Pluronic F-127 and 0.1 mg/ml BSA for 20 min at room temperature (23°C). Coverslips were then mounted onto a perfusion chamber (Warner Instruments) on an inverted microscope (TE2000-S, Nikon, Japan). The cells were continuously perfused with KRH buffer containing increasing extracellular Ca<sup>2+</sup> concentrations (0–2.0 mM). Increasing the extracellular Ca<sup>2+</sup> concentration will lead to increased Ca<sup>2+</sup> entry and subsequent Ca<sup>2+</sup> loading of internal stores; when store Ca<sup>2+</sup> content reaches a threshold level, the RyR2 opens, resulting in a spontaneous Ca<sup>2+</sup> release event. Caffeine (10 mM) was applied at the end of each experiment to confirm the expression of active RyR2 channels. Time-lapse images (0.5 fps) were captured and analyzed with Compix Simple PCI 6 software (Compix Inc.). Fluorescence intensities were measured from regions of interest centered on individual cells. Only cells that responded to caffeine were used in analyses.

### Dendritic spine density analysis

A FD Rapid GolgiStain kit (FD Neurotechnologies, Baltimore, MD, USA) was used for dendritic spine histological analysis by following the manufacturer's instructions as previously described (Zhao et al., 2015). Briefly, mouse brains were removed, placed in an appropriate impregnation solution and stored in the dark for 14 days at room temperature. The brains were then transferred into a solution containing sucrose and incubated at 4°C until the residual water was removed from the tissues (2–7 days). Finally, a vibratome (VT-1200, Leica, Germany) was used to obtain 100 μm thick, transverse hippocampal slices. Slices were then mounted onto gelatin-coated slides and allowed to air dry at room temperature for about two days. Once sufficiently dried, the slices were rinsed with distilled water and incubated for ten minutes in a solution containing silver nitrate. Slices were then rinsed with distilled water before being dehydrated in absolute alcohol, cleared with xylene and covered with non-acidic synthetic balsam and coverslips. Three independent slices per mouse were imaged. Z stacks of Golgi-stained CA1 neuron apical dendrites (up to 80 μm total on Z axis; optical section thickness = 0.5 μm) were taken at 100x magnification on a Zeiss AxioImager (Zeiss, Germany).

The secondary dendrites that were 100–250 μm away from the soma were used for analysis. Dendritic segments were identified and measured with ImageJ and RECONSTRUCT as described previously (Risher et al., 2014). Dendritic spines were identified as "Filopodia," "Long Thin," "Thin," "Stubby," "Mushroom" and "Branched." The densities of total protrusion and each type of spines were analyzed. Spine density was calculated by quantifying the number of spines per dendritic segment and normalized to 10 μm of dendritic length.

### QUANTIFICATION AND STATISTICAL ANALYSIS

All experiments were performed blindly to genotype, age and treatment. All data shown are medians and range (min and max), unless indicated otherwise. For small datasets (n number less than 15) or non-Gaussian distributed data, non-parametric methods were used. For large datasets and normally distributed data, parametric tests were performed. With respect to non-parametric analyses, for experiments with two groups, Mann-Whitney *U* test was used for unpaired samples. Wilcoxon matched-pairs signed rank test was used for paired samples. For experiments with 3 or more groups, Kruskal-Wallis test with Dunn-Bonferroni post hoc test and Friedman test with Dunn-Bonferroni post hoc test were used for independent samples or repeat measurements, respectively. With respect to parametric analyses, for experiments with two groups, Student's *t* test was used for unpaired samples. Paired *t* test was used for paired samples. For experiments with 3 or more groups, one-way ANOVA or two-way ANOVA test followed by Bonferroni post hoc test and repeated-measure ANOVA test with Bonferroni post hoc test were used for independent samples or repeat measurements, respectively. Sample sizes and *p* values can be found in figure legends. *P* values smaller than 0.05 were considered statistically significant.



Cell Reports, Volume 32

## Supplemental Information

**Limiting RyR2 Open Time Prevents**

**Alzheimer's Disease-Related Neuronal Hyperactivity**

**and Memory Loss but Not  $\beta$ -Amyloid Accumulation**

**Jinjing Yao, Bo Sun, Adam Institoris, Xiaoqin Zhan, Wenting Guo, Zhenpeng Song, Yajing Liu, Florian Hiess, Andrew K.J. Boyce, Mingke Ni, Ruiwu Wang, Henk ter Keurs, Thomas G. Back, Michael Fill, Roger J. Thompson, Ray W. Turner, Grant R. Gordon, and S.R. Wayne Chen**

# SUPPLEMENTARY FIGURES

## Supplementary Fig. 1

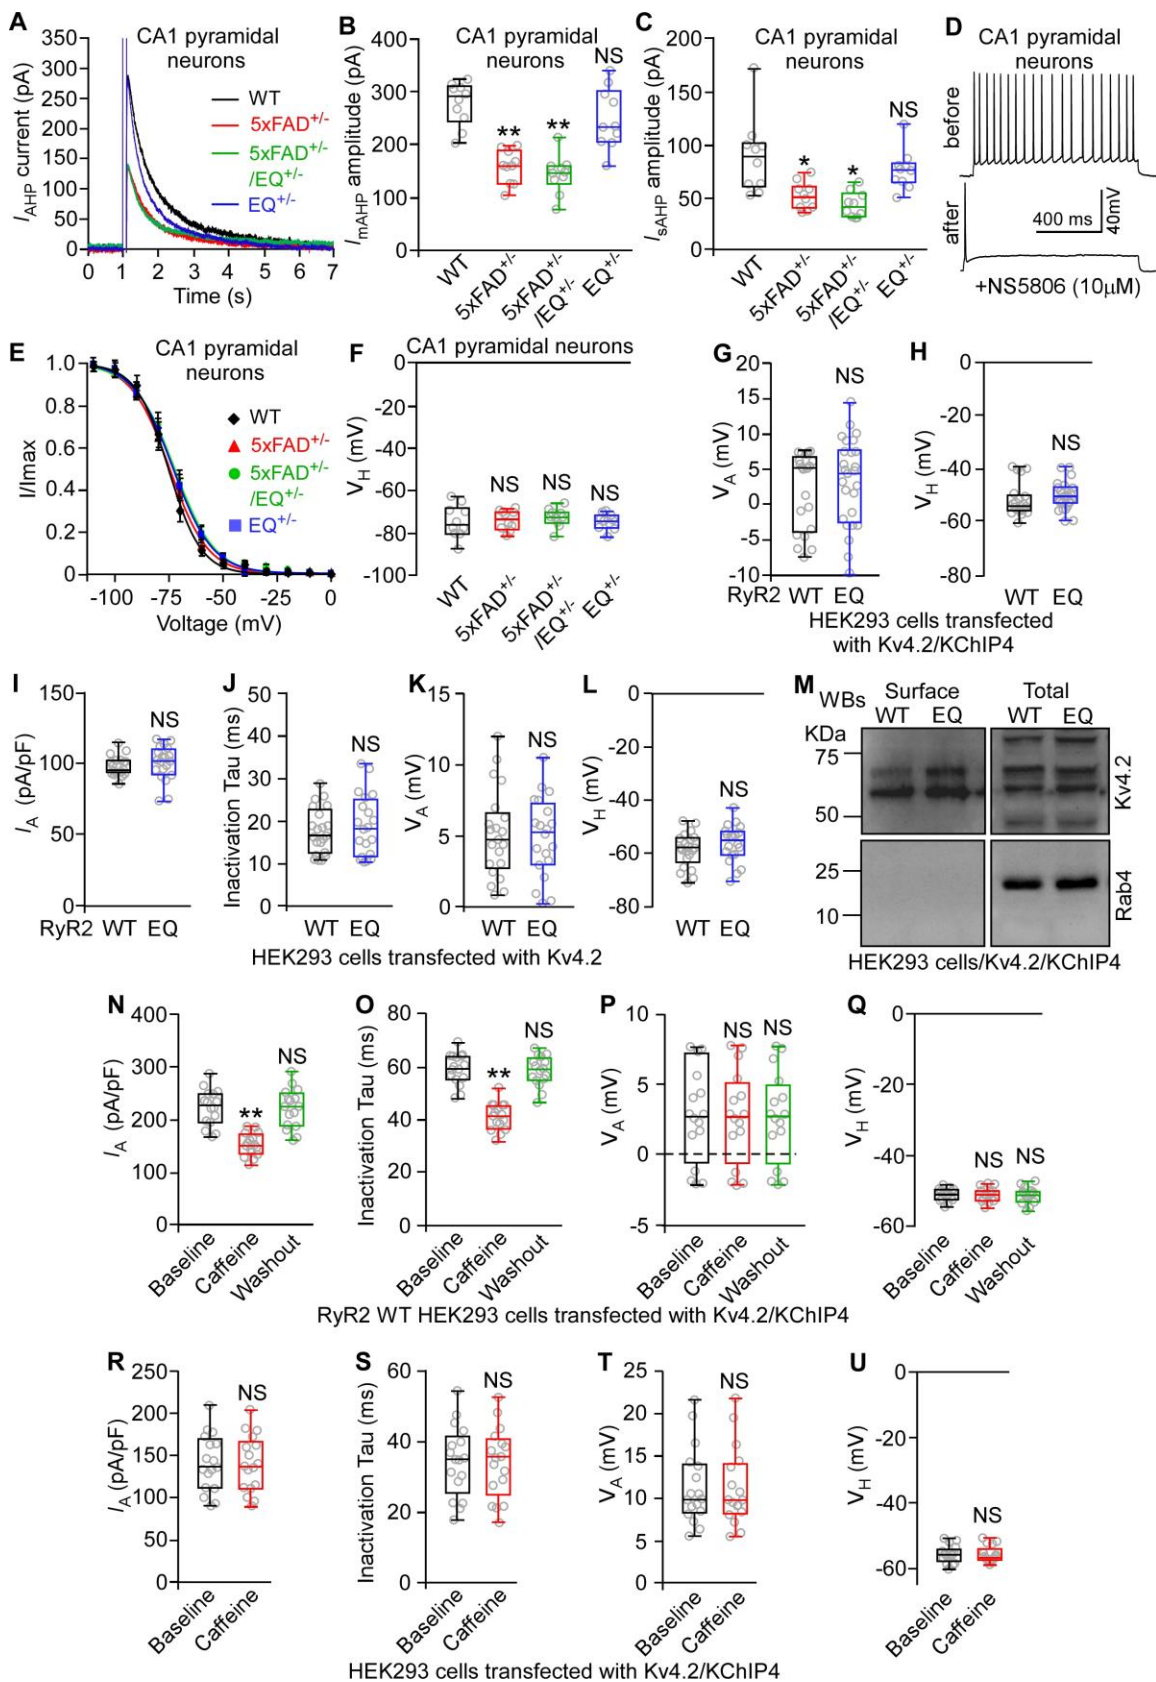

**Supplementary Fig. 1. Effects of RyR2-E4872Q<sup>+/-</sup> on the afterhyperpolarization current ( $I_{AHP}$ ), A-type K<sup>+</sup> current ( $I_A$ ), and surface expression of Kv4.2, and effect of pharmacological manipulation of RyR2 on  $I_A$ . Related to Fig.1.**

(A) Whole-cell voltage-clamp recording of afterhyperpolarization current ( $I_{AHP}$ ) from 3-4 months old WT, 5xFAD<sup>+/-</sup>, 5xFAD<sup>+/-</sup>/EQ<sup>+/-</sup> and EQ<sup>+/-</sup> CA1 pyramidal neurons. Mean amplitude of  $I_{mAHP}$  (B) and  $I_{sAHP}$  (C) recorded from WT (10 mice, 19 neurons), 5xFAD<sup>+/-</sup> (10 mice, 22 neurons), 5xFAD<sup>+/-</sup>/EQ<sup>+/-</sup> (10 mice, 22 neurons) and EQ<sup>+/-</sup> (10 mice, 19 neurons) CA1 neurons. (D) Action potential (AP) firing in 3-4 months old 5xFAD<sup>+/-</sup> mouse CA1 neurons before and after 10  $\mu$ M NS5806. (E) Steady-state inactivation of whole cell A-type K<sup>+</sup> currents ( $I_A$ ) in 3-4 months old WT, 5xFAD<sup>+/-</sup>, 5xFAD<sup>+/-</sup>/EQ<sup>+/-</sup>, and EQ<sup>+/-</sup> mouse CA1 neurons. (F)  $V_H$  recorded from WT (10 mice, 30 neurons), 5xFAD<sup>+/-</sup> (10 mice, 30 neurons), 5xFAD<sup>+/-</sup>/EQ<sup>+/-</sup> (10 mice, 30 neurons) and EQ<sup>+/-</sup> (10 mice, 30 neurons) CA1 neurons. Midpoints of  $I_A$  voltage dependent activation ( $V_A$ ) (G) and midpoints of  $I_A$  voltage dependent inactivation ( $V_H$ ) (H) in Kv4.2/KChIP4 transfected HEK293 cells expressing RyR2 WT (n = 21), RyR2 E4872Q<sup>+/-</sup> mutation (n = 26). Whole cell  $I_A$  (I), inactivation time constant Tau (J),  $V_A$  (K) and  $V_H$  (L) in Kv4.2 (alone) transfected HEK293 cells expressing RyR2 WT (n = 21) or RyR2 E4872Q<sup>+/-</sup> mutation (n = 20). (M) Immunoblotting of whole cell lysate from Kv4.2/KChIP4 transfected HEK293 cells expressing RyR2 WT or RyR2 E4872Q mutation. Whole cell  $I_A$  (N), inactivation time constant Tau (O),  $V_A$  (P) and  $V_H$  (Q) in Kv4.2/KChIP4 transfected HEK293 cells expressing RyR2 WT (n = 16) at baseline, 2 min after application of caffeine (2.5 mM) and 5 min after washout. Whole cell  $I_A$  (R), inactivation time constant Tau (S),  $V_A$  (T) and  $V_H$  (U) recorded in Kv4.2/KChIP4 transfected HEK293 cells (n = 17) at baseline and 2 min after application of caffeine (2.5 mM). Data shown are the median and range (Kruskal-Wallis test with Dunn-Bonferroni post hoc test, Mann-Whitney  $U$  test, paired t test, Wilcoxon matched-pairs signed rank test, repeated measure ANOVA test with Bonferroni post hoc test and Friedman test with Dunn-Bonferroni post hoc test; \*P < 0.05, \*\*P < 0.01 vs WT or baseline, NS, not significant).

## Supplementary Fig. 2

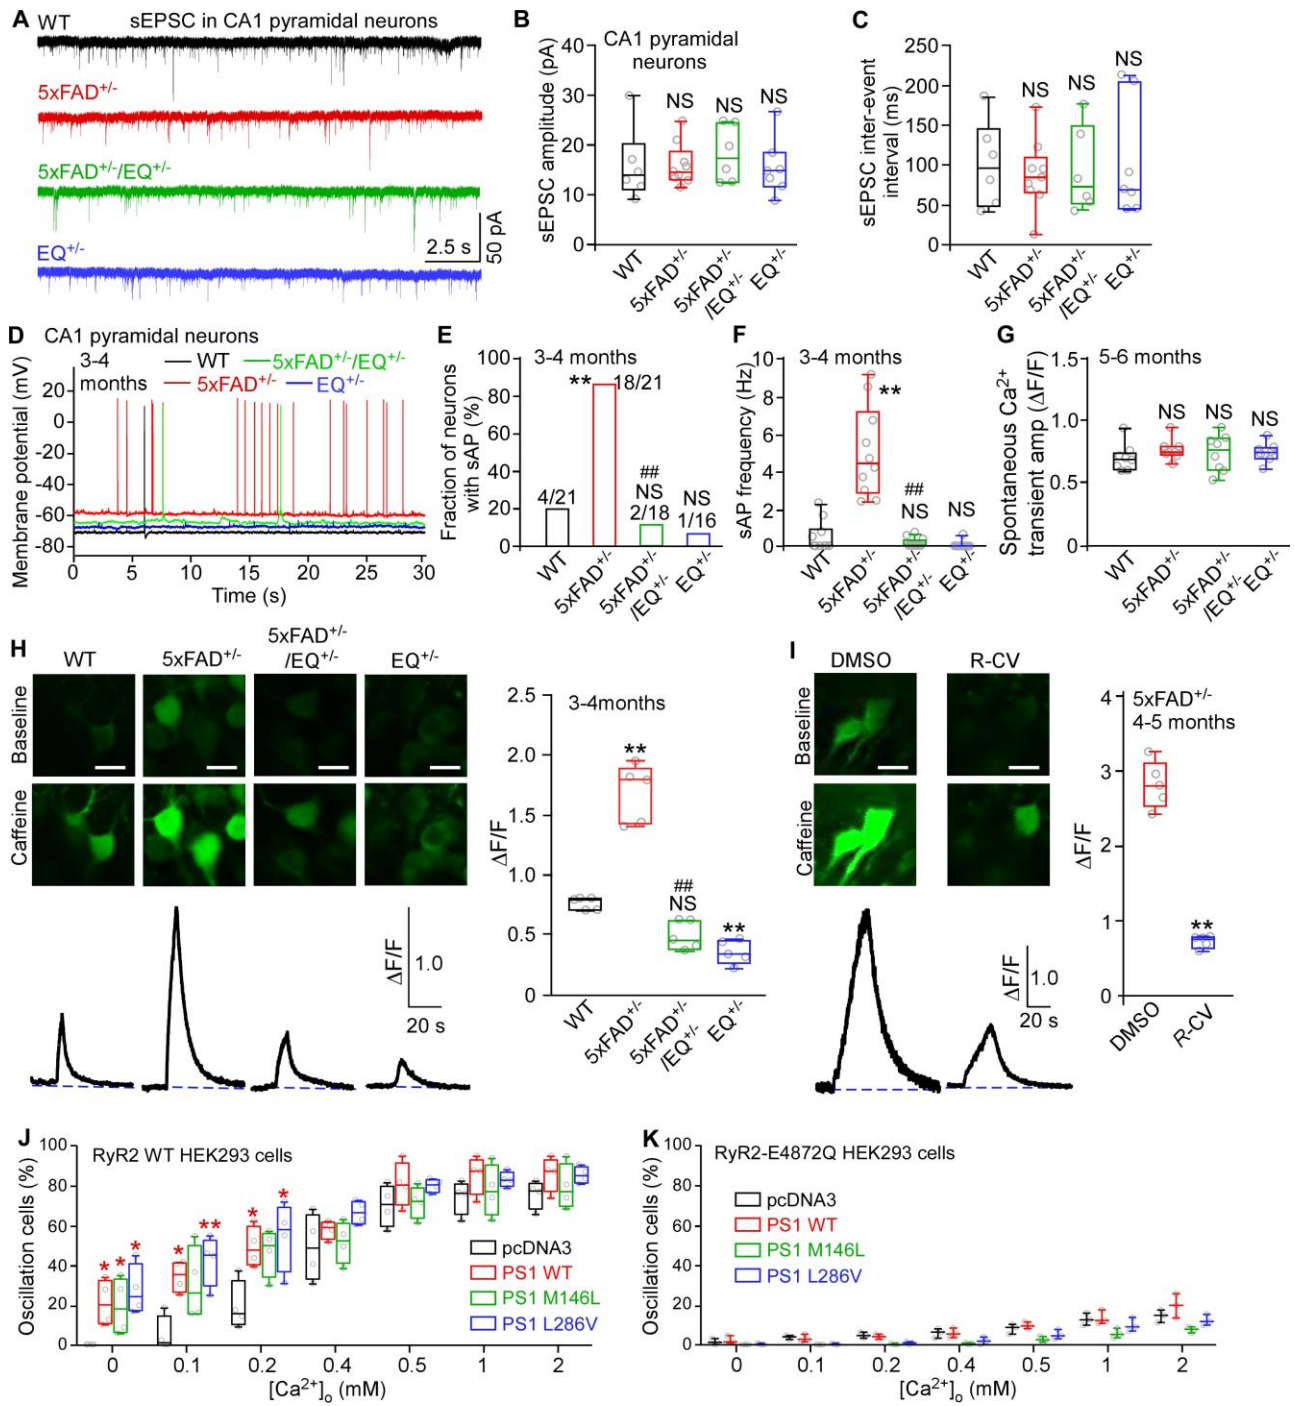

**Supplementary Fig. 2. Effects of RyR2-E4872Q<sup>+/-</sup> on presynaptic activity and spontaneous AP firing and effects of RyR2-E4872Q<sup>+/-</sup> and R-carvedilol on RyR2 function.** Related to Fig. 1 and Fig. 2.

(A) Whole-cell voltage-clamp recording of spontaneous excitatory post-synaptic currents (sEPSC) in 3-4 months old WT, 5xFAD<sup>+/-</sup>, 5xFAD<sup>+/-</sup>/EQ<sup>+/-</sup> and EQ<sup>+/-</sup> mouse CA1 neurons. Amplitude (B) and inter-event interval (C) of sEPSCs in 3-4 months old WT (6 mice, 11 neurons), 5xFAD<sup>+/-</sup> (9 mice, 23 neurons), 5xFAD<sup>+/-</sup>/EQ<sup>+/-</sup> (6 mice, 15 neurons) and EQ<sup>+/-</sup> (7 mice, 18 neurons) CA1 neurons. (D) Spontaneous action potential (sAP) firing in 3-4 months old WT, 5xFAD<sup>+/-</sup>, 5xFAD<sup>+/-</sup>/EQ<sup>+/-</sup> and EQ<sup>+/-</sup> mouse CA1 pyramidal neurons. (E) Fraction of CA1 pyramidal neurons showing sAP firing. (F) sAP firing frequency in WT (6 mice, 21 neurons), 5xFAD<sup>+/-</sup> (9 mice, 21 neurons), 5xFAD<sup>+/-</sup>/EQ<sup>+/-</sup> (6 mice, 18 neurons), and EQ<sup>+/-</sup> (7 mice, 16 neurons) CA1 neurons. (G) Amplitude of spontaneous Ca<sup>2+</sup> transients (*in vivo* Ca<sup>2+</sup> imaging) in CA1 neurons from 5-6 months old WT (8 mice, 2375 cells), 5xFAD<sup>+/-</sup> (8 mice, 1708 cells), 5xFAD<sup>+/-</sup>/EQ<sup>+/-</sup> (8 mice, 2283 cells), and EQ<sup>+/-</sup> (8 mice, 2392 cells). (H) Caffeine-induced Ca<sup>2+</sup> release in 3-4 months old GCaMP6f-expressing WT (5 mice, 58 neurons), 5xFAD<sup>+/-</sup> (5 mice, 67 neurons), 5xFAD<sup>+/-</sup>/EQ<sup>+/-</sup> (5 mice, 68 neurons), and EQ<sup>+/-</sup> (5 mice, 90 neurons) CA1 neurons, showing GCaMP6f images of CA1 pyramidal neurons of different genotypes before (baseline) and after application of caffeine (40 mM) (top left), fluorescence traces (bottom left), and average data (right). (I) Caffeine-induced Ca<sup>2+</sup> release in 4-5 months old GCaMP6f-expressing 5xFAD<sup>+/-</sup> mice treated with DMSO (5 mice, 112 neurons) and R-CV (5 mice, 113 neurons) for 1 month, showing GCaMP6f images of CA1 pyramidal neurons treated with DMSO or R-CV before (baseline) and after application of caffeine (40 mM) (top left), fluorescence traces (bottom left), and average data (right). Fraction of cells displaying spontaneous Ca<sup>2+</sup> oscillation at different external Ca<sup>2+</sup> concentrations in HEK293 cells expressing RyR2 WT (J) or RyR2-E4872Q mutant (K) transfected with control plasmid (pcDNA3), presenilin 1 (PS1)-WT, PS1-M146L or PS1-L286V. Scale bars: 5 μm. Data shown are the median and range (Kruskal-Wallis test with Dunn-Bonferroni post hoc test and Mann-Whitney *U* test; \**P* < 0.05, \*\**P* < 0.01 vs WT or control, ###*P* < 0.01, 5xFAD<sup>+/-</sup>/EQ<sup>+/-</sup> vs 5xFAD<sup>+/-</sup>, NS, not significant).

### Supplementary Fig. 3

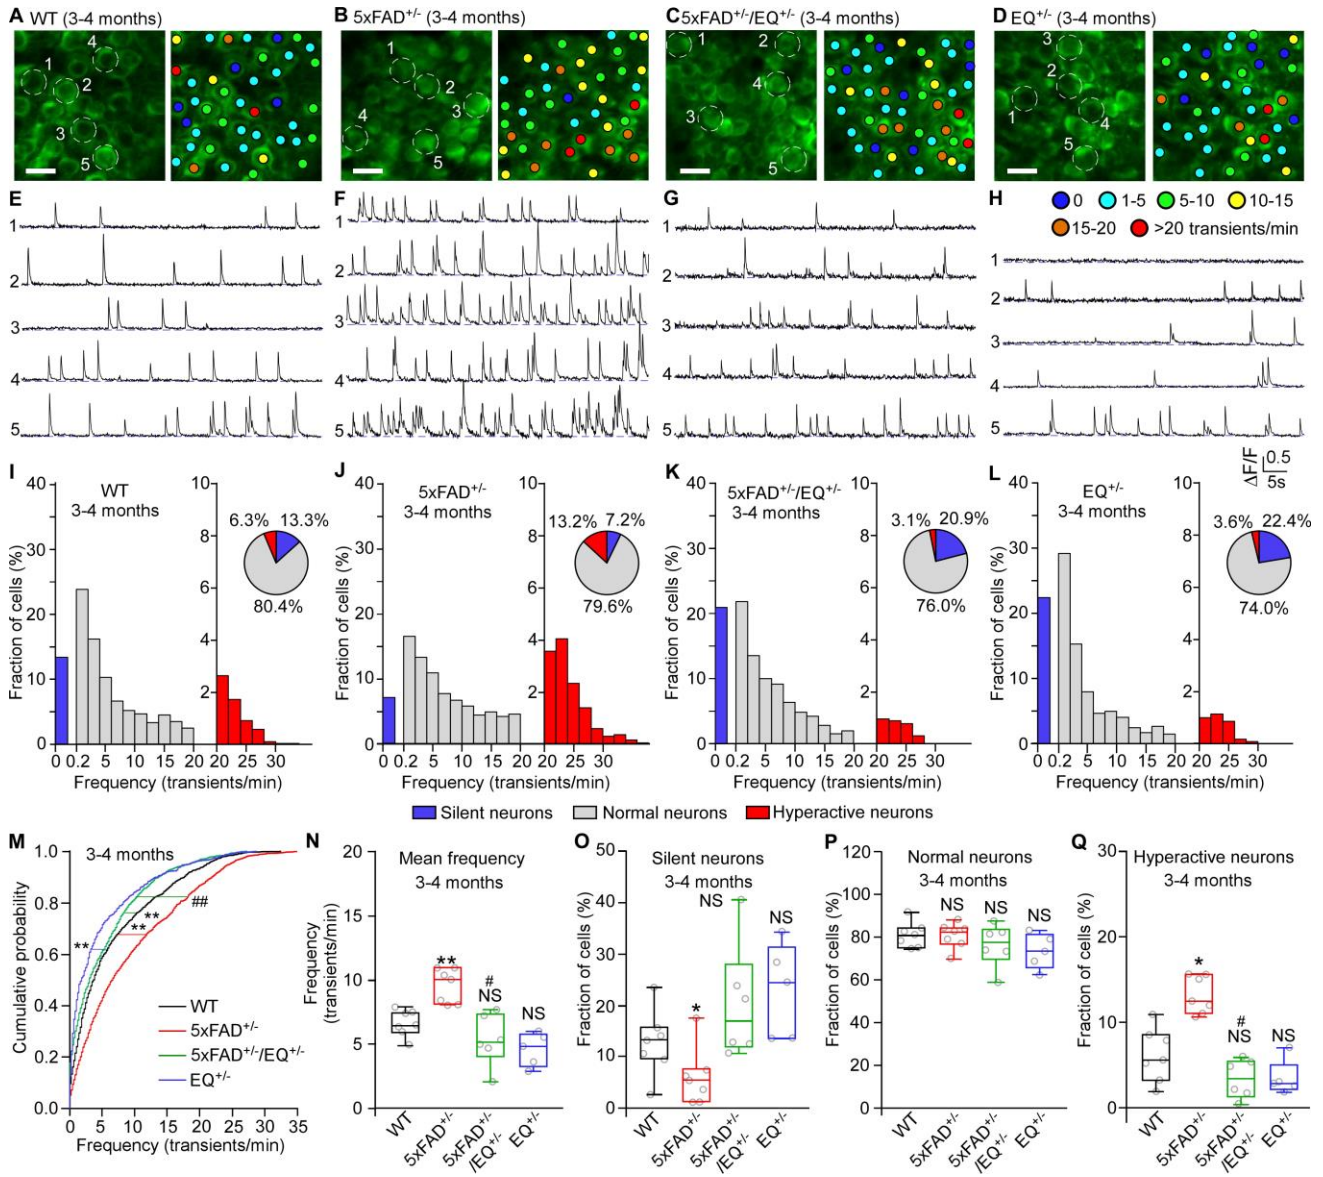

**Supplementary Fig. 3. The RyR2 E4872Q<sup>+/-</sup> mutation prevents neuronal hyperactivity of 5xFAD<sup>+/-</sup> hippocampal CA1 neurons *in vivo*.** Related to Fig.2.

Two-photon *in vivo* Ca<sup>2+</sup> images of hippocampal CA1 region of 3-4 months old WT (**A**), 5xFAD<sup>+/-</sup> (**B**), 5xFAD<sup>+/-</sup>/EQ<sup>+/-</sup> (**C**) and EQ<sup>+/-</sup> (**D**) mice. The colored dots indicate the number of Ca<sup>2+</sup> transients per minute. (**E-H**) Ca<sup>2+</sup> traces of the five neurons circled in **A-D**, respectively. Histograms showing the frequency distribution of Ca<sup>2+</sup> transients in WT (**I**, 7 mice, 1756 cells), 5xFAD<sup>+/-</sup> (**J**, 7 mice, 1466 cells), 5xFAD<sup>+/-</sup>/EQ<sup>+/-</sup> (**K**, 6 mice, 1089 cells) and EQ<sup>+/-</sup> (**L**, 5 mice, 715 cells). Pie charts show the relative proportions of silent, normal, and hyperactive neurons. (**M**) Cumulative probability functions showing frequency distributions of spontaneous Ca<sup>2+</sup> transients in CA1 region of WT (black), 5xFAD<sup>+/-</sup> (red), 5xFAD<sup>+/-</sup>/EQ<sup>+/-</sup> (green) and EQ<sup>+/-</sup> (blue) mice (Kruskal-Wallis test with Dunn's multiple comparisons test; \*\*P < 0.0001 vs WT. ##P < 0.0001 5xFAD<sup>+/-</sup>/EQ<sup>+/-</sup> vs 5xFAD<sup>+/-</sup>, NS, not significant). (**N**) Mean Ca<sup>2+</sup> transient frequency in WT, 5xFAD<sup>+/-</sup>, 5xFAD<sup>+/-</sup>/EQ<sup>+/-</sup> and EQ<sup>+/-</sup> mice CA1 region as defined previously (Busche, 2018; Busche et al., 2012; Busche et al., 2008). Percentage of silent (**O**), normal (**P**) and hyperactive (**Q**) cells in WT, 5xFAD<sup>+/-</sup>, 5xFAD<sup>+/-</sup>/EQ<sup>+/-</sup> and EQ<sup>+/-</sup> mice CA1 region. Note that analyses of frequency distributions (**I** to **M**) were performed using cells pooled from all animals, while analyses of mean frequency and fraction of silent, normal, and hyperactive cells (**N** to **Q**) were based on data from individual animals. Scale bars: 10 μm. Data shown are the median and range (Kruskal-Wallis test with Dunn-Bonferroni post hoc test; \*P < 0.05, \*\*P < 0.01 vs WT, #P < 0.05 5xFAD<sup>+/-</sup>/EQ<sup>+/-</sup> vs 5xFAD<sup>+/-</sup>, NS, not significant).

**Supplementary Fig. 4**

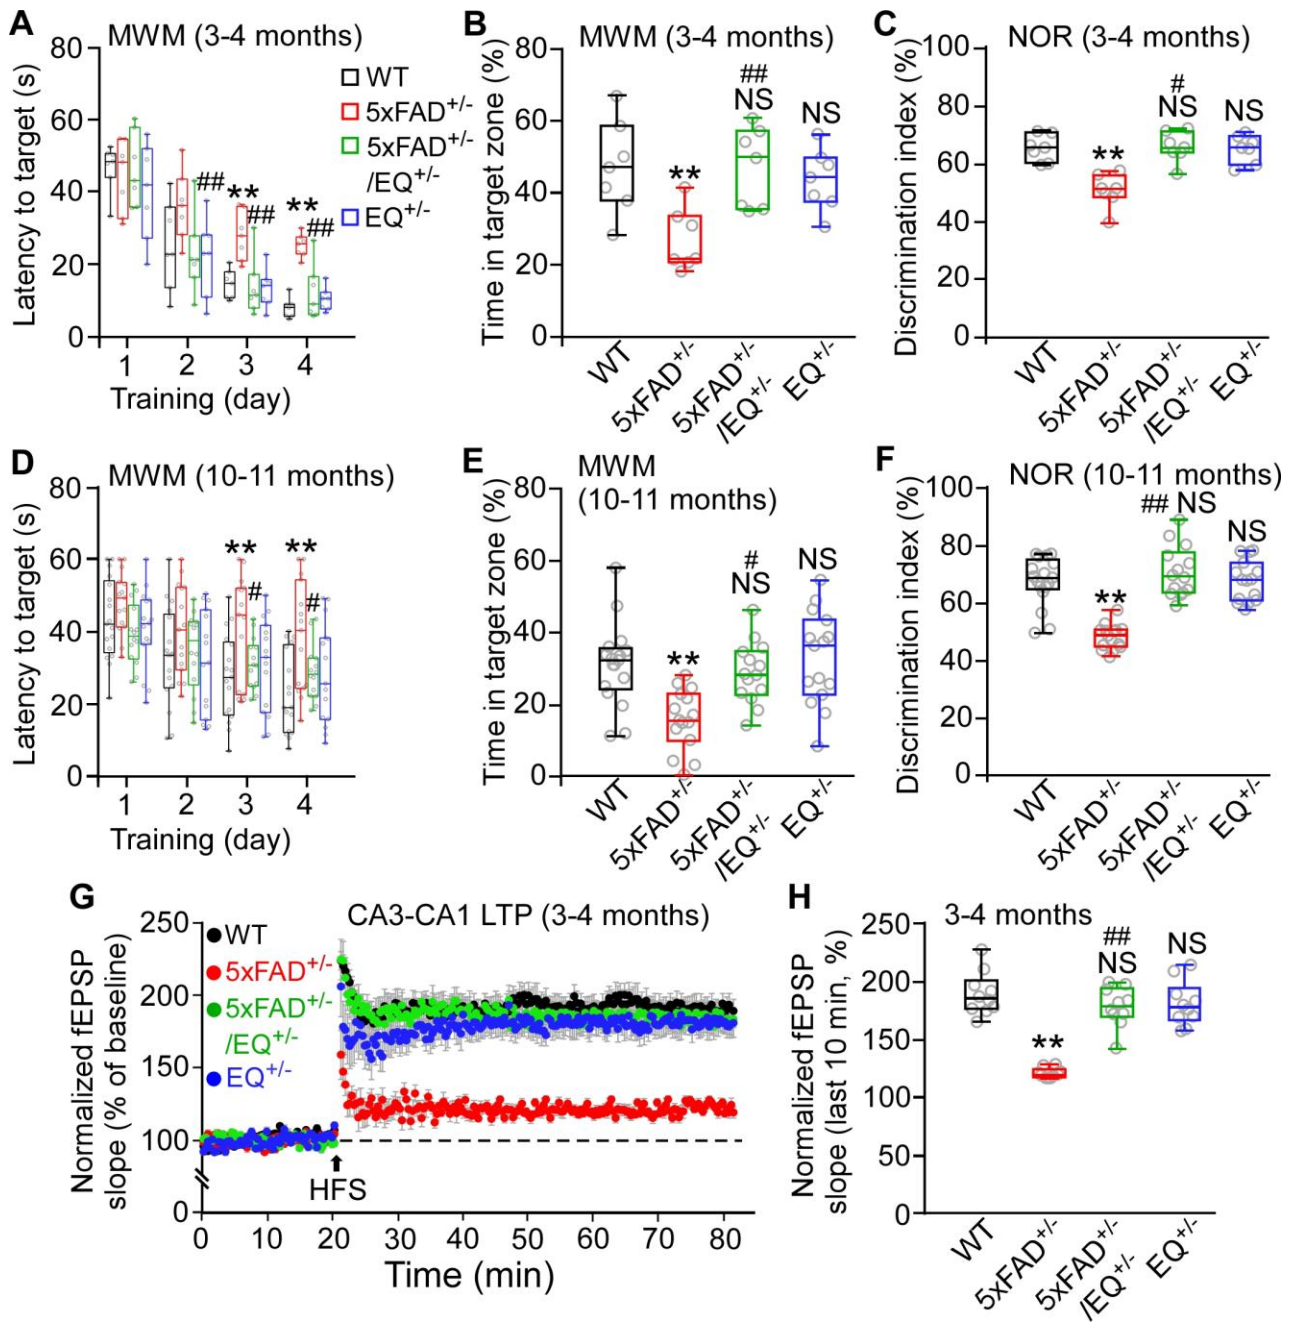



**Supplementary Fig. 4. The E4872Q<sup>+/-</sup> mutation prevents memory loss and LTP impairment in both young and aged 5xFAD<sup>+/-</sup> mice.** Related to Fig. 3.

(A) The latency to reach the target platform of 3-4 months old WT (n = 7), 5xFAD<sup>+/-</sup> (n = 7), 5xFAD<sup>+/-</sup>/EQ<sup>+/-</sup> (n = 7) and EQ<sup>+/-</sup> (n = 7) mice in the Morris Water Maze (MWM) test. (B) The time spent in the target quadrant. (C) The percentage of time spent on the novel object during the Novel Object Recognition (NOR) test in 3-4 months old WT (n = 7), 5xFAD<sup>+/-</sup> (n = 7), 5xFAD<sup>+/-</sup>/EQ<sup>+/-</sup> (n = 7) and EQ<sup>+/-</sup> (n = 7) mice. (D) The latency to reach the target platform of 10-11 months old WT (n = 17), 5xFAD<sup>+/-</sup> (n = 15), 5xFAD<sup>+/-</sup>/EQ<sup>+/-</sup> (n = 14) and EQ<sup>+/-</sup> (n = 15) mice in the Morris Water Maze (MWM) test. (E) The time spent in the target quadrant. (F) The percentage of time spent on the novel object during the Novel Object Recognition (NOR) test in 10-11 months old WT (n = 17), 5xFAD<sup>+/-</sup> (n = 15), 5xFAD<sup>+/-</sup>/EQ<sup>+/-</sup> (n = 14) and EQ<sup>+/-</sup> (n = 15) mice. (G) Effect of 100 Hz high frequency stimulation (HFS) on mean CA3-CA1 fEPSP slope in hippocampal slices from 3-4 months old WT (10 mice, 20 slices), 5xFAD<sup>+/-</sup> (10 mice, 20 slices), 5xFAD<sup>+/-</sup>/EQ<sup>+/-</sup> (10 mice, 20 slices) and EQ<sup>+/-</sup> (10 mice, 20 slices). Data were normalized to the mean fEPSP slope in slices from 20 min baseline recording. (H) The averaged normalized fEPSP slope recorded between 50-60 min after HFS. Data shown are the median and range (Kruskal-Wallis test with Dunn-Bonferroni post hoc test; \*\*P < 0.01 vs WT, #P < 0.05, ##P < 0.01 5xFAD<sup>+/-</sup>/EQ<sup>+/-</sup> vs 5xFAD<sup>+/-</sup>, NS, not significant).

## Supplementary Fig. 5

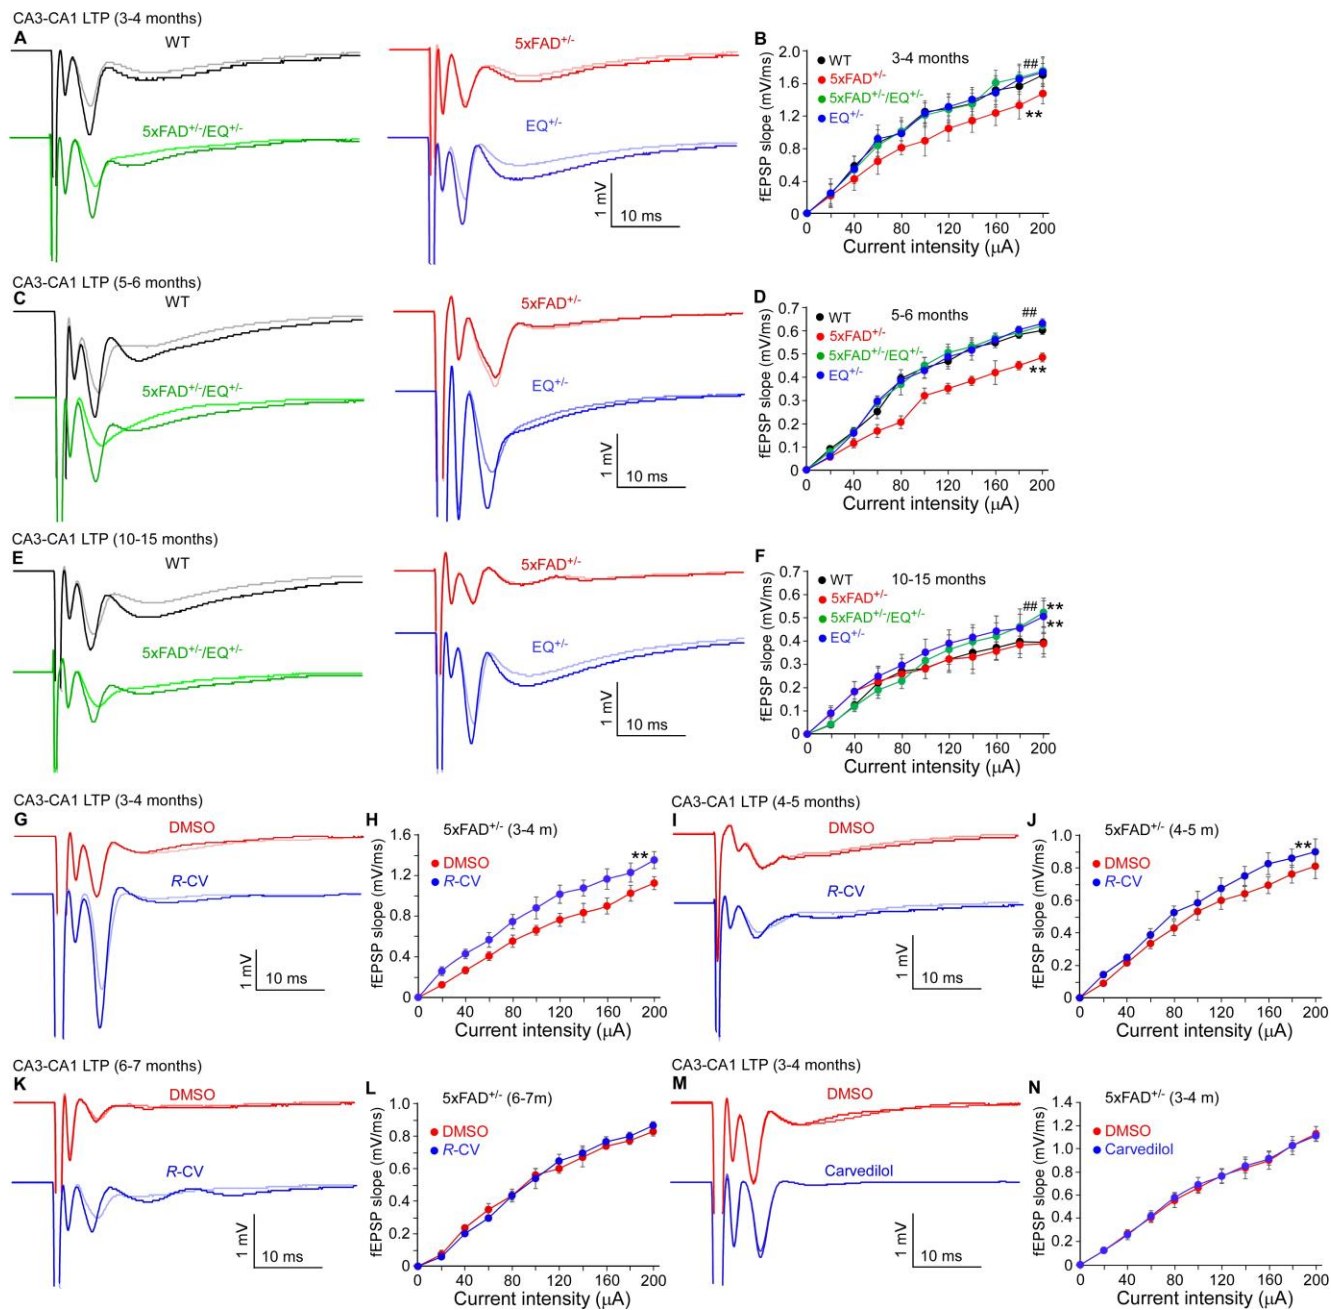

**Supplementary Fig. 5. Effect of the RyR2 E4872Q<sup>+/-</sup> mutation, carvedilol, and R-carvedilol on the input-output relationship in the mouse hippocampal CA3-CA1 pathway.** Related to Fig. 3 and Fig. 5.

(A) fEPSP traces recorded from 3-4 months old WT, 5xFAD<sup>+/-</sup>, 5xFAD<sup>+/-</sup>/EQ<sup>+/-</sup> and EQ<sup>+/-</sup> mouse hippocampal slices before (lighter color) and after (darker color) LTP induction. (B) Input-output relationships between fEPSP slope and stimulus intensity measured from CA3-CA1 pathway in 3-4 months old WT (10 mice, 20 slices), 5xFAD<sup>+/-</sup> (10 mice, 20 slices), 5xFAD<sup>+/-</sup>/EQ<sup>+/-</sup> (10 mice, 20 slices), and EQ<sup>+/-</sup> (10 mice, 20 slices) mouse hippocampal slices. (C) fEPSP traces recorded from 5-6 months old WT, 5xFAD<sup>+/-</sup>, 5xFAD<sup>+/-</sup>/EQ<sup>+/-</sup> and EQ<sup>+/-</sup> mouse hippocampal slices before (lighter color) and after (darker color) LTP induction. (D) Input-output relationships between fEPSP slope and stimulus intensity measured from CA3-CA1 pathway in 5-6 months old WT (10 mice, 20 slices), 5xFAD<sup>+/-</sup> (10 mice, 20 slices), 5xFAD<sup>+/-</sup>/EQ<sup>+/-</sup> (10 mice, 20 slices), and EQ<sup>+/-</sup> (10 mice, 20 slices) mouse hippocampal slices. (E) fEPSP traces recorded from 10-15 months old WT, 5xFAD<sup>+/-</sup>, 5xFAD<sup>+/-</sup>/EQ<sup>+/-</sup>, and EQ<sup>+/-</sup> mouse hippocampal slices before (lighter color) and after (darker color) LTP induction. (F) Input-output relationships between fEPSP slope and stimulus intensity measured from CA3-CA1 pathway in 10-15 months old WT (10 mice, 20 slices), 5xFAD<sup>+/-</sup> (10 mice, 20 slices), 5xFAD<sup>+/-</sup>/EQ<sup>+/-</sup> (10 mice, 20 slices), and EQ<sup>+/-</sup> (10 mice, 20 slices) mouse hippocampal slices. Data shown are the mean ± SD. (Two-way ANOVA with Bonferroni post hoc test; \*\*\*P < 0.01 compared to WT, ##P < 0.01 5xFAD<sup>+/-</sup>/EQ<sup>+/-</sup> vs 5xFAD<sup>+/-</sup>). (G) fEPSP traces recorded from hippocampal slices of 3-4 months old 5xFAD<sup>+/-</sup> mice treated with DMSO or R-carvedilol (R-CV) before (lighter color) and after (darker color) LTP induction. (H) Input-output relationships between fEPSP slope and stimulus intensity measured from hippocampal slices of 3-4 months old 5xFAD<sup>+/-</sup> mice treated with DMSO (10 mice, 20 slices) or R-CV (10 mice, 20 slices). (I) fEPSP traces recorded from hippocampal slices of 4-5 months old 5xFAD<sup>+/-</sup> mice treated with DMSO or R-CV before (lighter color) and after (darker color) LTP induction. (J) Input-output relationships between fEPSP slope and stimulus intensity measured from hippocampal slices of 4-5 months old 5xFAD<sup>+/-</sup> mice treated with DMSO (10 mice, 20 slices) or R-CV (10 mice, 20 slices). (K) fEPSP traces recorded from hippocampal slices of 6-7 months old 5xFAD<sup>+/-</sup> mice treated with DMSO or R-CV before (lighter color) and after (darker color) LTP induction. (L) Input-output relationships between fEPSP slope and stimulus intensity measured from hippocampal slices of 6-7 months old 5xFAD<sup>+/-</sup> mice treated with DMSO (10 mice, 20 slices) or R-CV (10 mice, 20 slices). (M) fEPSP traces recorded from hippocampal slices of 3-4 months old 5xFAD<sup>+/-</sup> mice treated with DMSO or carvedilol before (lighter color) and after (darker color) LTP

induction. (N) Input-output relationships between fEPSP slope and stimulus intensity measured from hippocampal slices of 3-4 months old 5xFAD<sup>+/-</sup> mice treated with DMSO (10 mice, 20 slices) or carvedilol (10 mice, 20 slices). Data shown are the mean  $\pm$  SD (Two-way ANOVA with Bonferroni post hoc test; \*\*P < 0.01 compared to the DMSO group).

### Supplementary Fig. 6

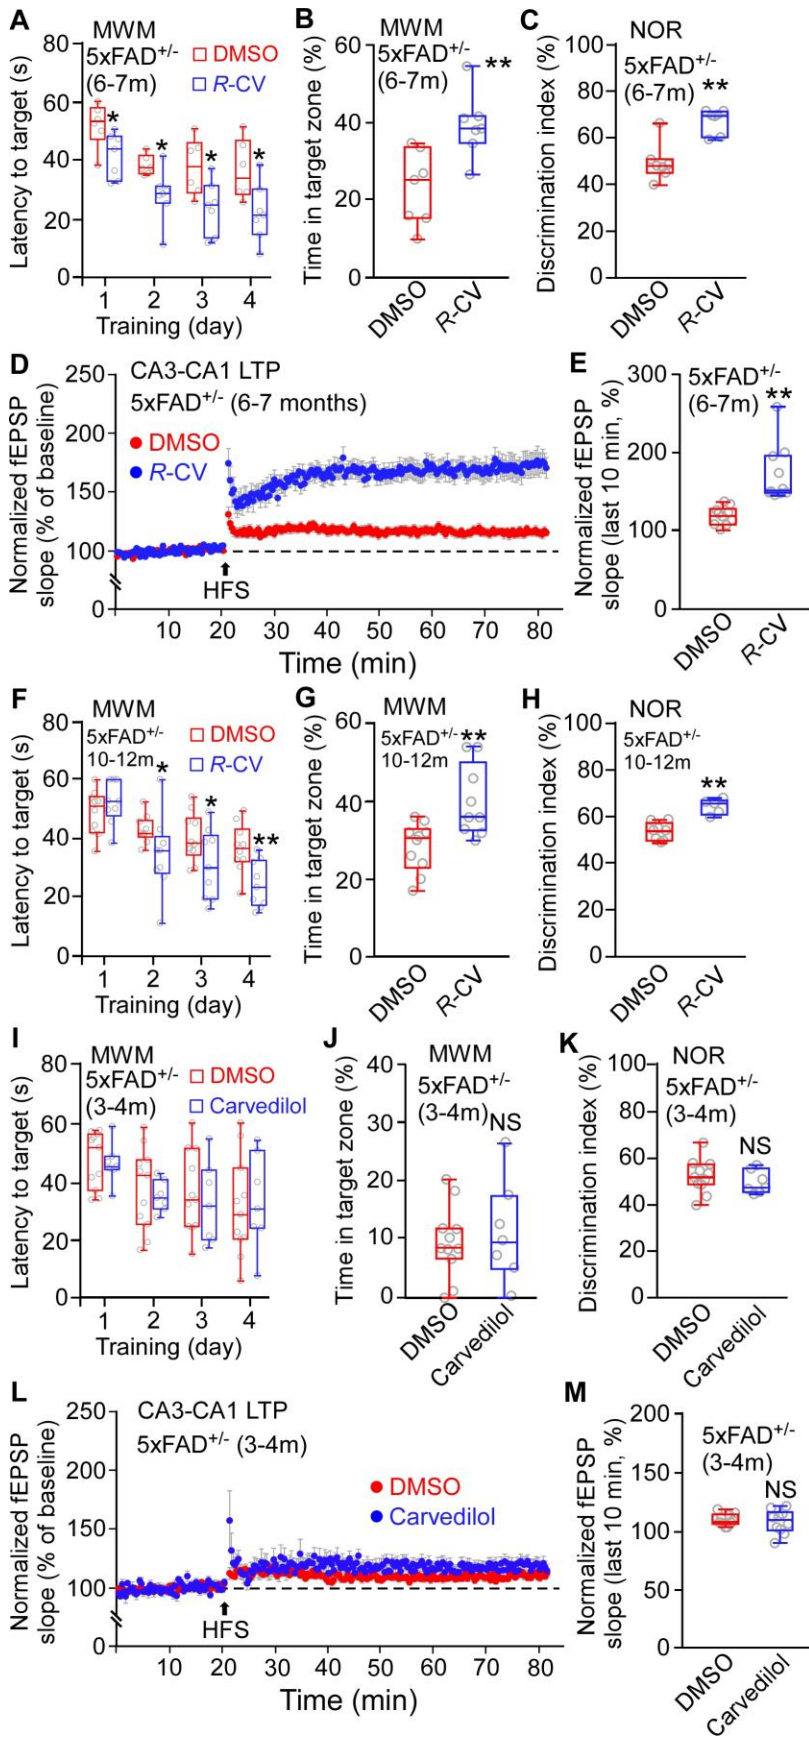

**Supplementary Fig. 6. R-carvedilol but not carvedilol racemic mixture rescues memory loss and LTP deficit in 5xFAD<sup>+/-</sup> mice.** Related to Fig. 5.

5xFAD<sup>+/-</sup> mice were treated with DMSO or R-carvedilol (R-CV, 3.2 mg/kg/day) for 1 month, starting at 5-6 months or 9-11 months of age after the onset of neuronal hyperactivity and memory loss. (A) The latency to reach the target platform of 6-7 months old 5xFAD<sup>+/-</sup> mice treated with DMSO (n=6) or R-CV (n=7) in MWM test. (B) The time spent in the target quadrant. (C) The percentage of time spent on the novel object during the NOR test in 6-7 months old 5xFAD<sup>+/-</sup> mice treated with DMSO (n=6) or R-CV (n=7). (D) Effect of 100 Hz high frequency stimulation (HFS) on mean CA3-CA1 fEPSP slope in brain slices from 6-7 months old 5xFAD<sup>+/-</sup> mice treated with DMSO (10 mice, 20 slices) or R-CV (10 mice, 20 slices). (E) The averaged normalized fEPSP slope recorded between 50-60 min after HFS from 6-7 months old 5xFAD<sup>+/-</sup> mice treated with DMSO or R-CV. (F) The latency to reach the target platform of 10-12 months old 5xFAD<sup>+/-</sup> mice treated with DMSO (n=13) or R-CV (n=12) in MWM test. (G) The time spent in the target quadrant. (H) The percentage of time spent on the novel object during the NOR test in 10-12 months old 5xFAD<sup>+/-</sup> mice treated with DMSO (n=8) or R-CV (n=5). 5xFAD<sup>+/-</sup> mice were treated with DMSO or carvedilol (3.2 mg/kg/day) for 1 month, starting at 2-3 months of age before the onset of neuronal hyperactivity and memory loss. (I) The latency to reach the target platform of 3-4 months old 5xFAD<sup>+/-</sup> mice treated with DMSO (n=11) or carvedilol (n=7) in MWM test. (J) The time spent in the target quadrant. (K) The percentage of time spent on the novel object during the NOR test in 3-4 months old 5xFAD<sup>+/-</sup> mice treated with DMSO (n=11) or carvedilol (n=7). (L) Effect of 100 Hz high frequency stimulation (HFS) on mean CA3-CA1 fEPSP slope in brain slices from 3-4 months old 5xFAD<sup>+/-</sup> mice treated with DMSO (10 mice, 20 slices) or carvedilol (10 mice, 20 slices). (M) The averaged normalized fEPSP slope recorded between 50-60 min after HFS from 3-4 months old 5xFAD<sup>+/-</sup> mice treated with DMSO or carvedilol. Data shown are the median and range (Mann-Whitney *U* test; \**P* < 0.05, \*\**P* < 0.01 vs DMSO group, NS, not significant).

# Supplementary Fig. 7

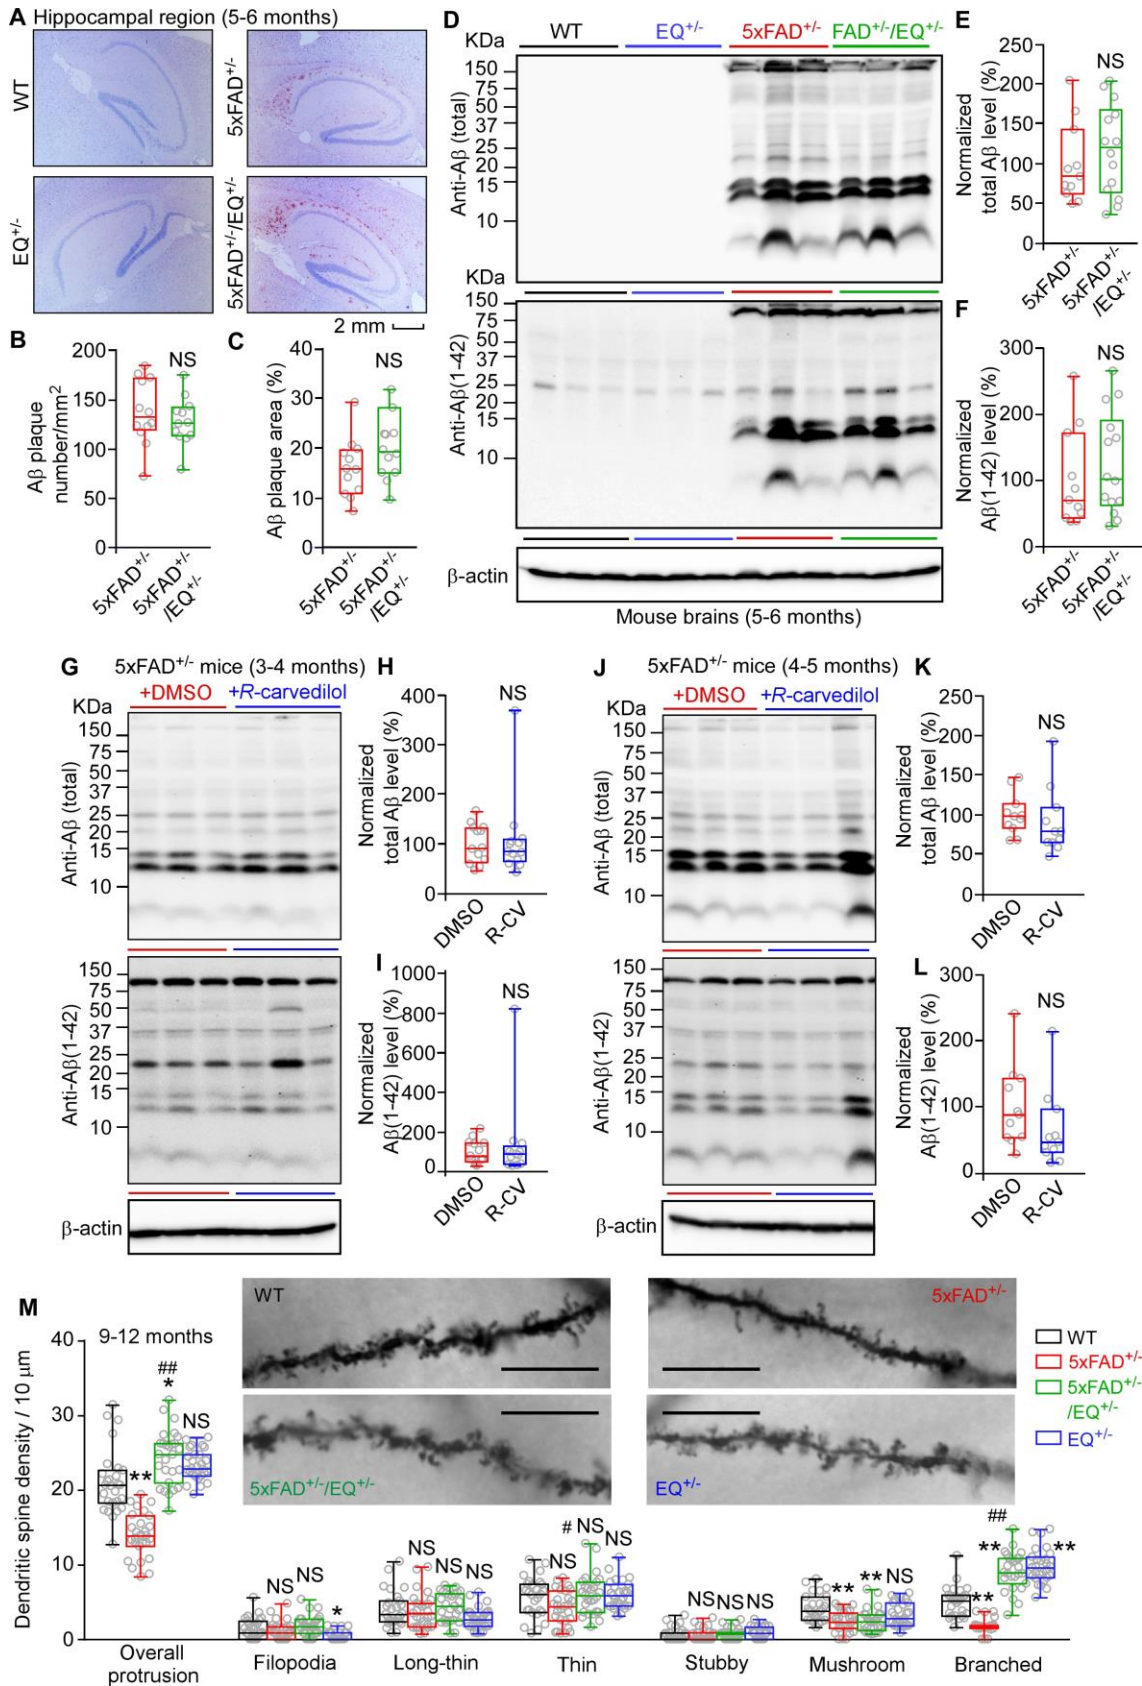

**Supplementary Fig. 7. Effect of the E4872Q<sup>+/-</sup> mutation and R-carvedilol on A $\beta$ -accumulation and effect of E4872Q<sup>+/-</sup> on CA1 pyramidal neuron apical dendritic spine density and morphology. Related to Fig. 6 and Fig. 7.**

(A) A $\beta$  deposition in the hippocampus in 5-6 months old WT, EQ<sup>+/-</sup>, 5xFAD<sup>+/-</sup> and 5xFAD<sup>+/-</sup>/EQ<sup>+/-</sup> mouse brains. (B) Averaged A $\beta$  plaque number per mm<sup>2</sup> in 5-6 months old 5xFAD<sup>+/-</sup> (12 mice, 36 slices) and 5xFAD<sup>+/-</sup>/EQ<sup>+/-</sup> (12 mice, 36 slices) mouse hippocampal region. (C) Percentage of hippocampal area showing positive A $\beta$  staining. (D) Immunoblotting analysis of brain tissue homogenates from 5-6 months old WT, EQ<sup>+/-</sup>, 5xFAD<sup>+/-</sup>, and 5xFAD<sup>+/-</sup>/EQ<sup>+/-</sup> mice. (E) Normalized total A $\beta$  levels and (F) Normalized A $\beta$  (1-42) levels in WT (n=9), EQ<sup>+/-</sup> (n=12), 5xFAD<sup>+/-</sup> (n=11), and 5xFAD<sup>+/-</sup>/EQ<sup>+/-</sup> (n=14) brains. (G-L) 5xFAD<sup>+/-</sup> mice were treated with DMSO or R-carvedilol (R-CV) (3.2 mg/kg/day) for 1 month, starting at 2-3 months or 3-4 months of age before or after the onset of neuronal hyperactivity and memory loss. (G) Immunoblotting analysis of brain tissue homogenates from 3-4 months old 5xFAD<sup>+/-</sup> mice treated with DMSO or R-CV. (H) Normalized total A $\beta$  levels and (I) Normalized A $\beta$  (1-42) levels in 5xFAD<sup>+/-</sup> mice treated with DMSO (n=13) or R-CV (n=13) at the age of 3-4 months old. (J) Immunoblotting using brain tissue homogenates from 4-5 months old 5xFAD<sup>+/-</sup> mice treated with DMSO or R-CV. (K) Normalized total A $\beta$  levels and (L) Normalized A $\beta$  (1-42) levels in 5xFAD<sup>+/-</sup> mice treated with DMSO (n=11) or R-CV (n=11) at the age of 4-5 months old. Data shown are the median and range (Mann-Whitney *U* test; NS, not significant). (M) Apical dendritic spine density in 9-12 months old WT (3 mice, 27 dendrites), 5xFAD<sup>+/-</sup> (3 mice, 27 dendrites), 5xFAD<sup>+/-</sup>/EQ<sup>+/-</sup> (3 mice, 27 dendrites), and EQ<sup>+/-</sup> (3 mice, 27 dendrites) CA1 neurons. Upper panel: Golgi staining images, scale bars: 10  $\mu$ m. Lower panel: densities of overall protrusions and different types of dendritic spines. Data shown are the median and range (Kruskal-Wallis test with Dunn-Bonferroni post hoc test; \**P* < 0.05, \*\**P* < 0.01 vs WT, #*P* < 0.05, ###*P* < 0.01 5xFAD<sup>+/-</sup>/EQ<sup>+/-</sup> vs 5xFAD<sup>+/-</sup>, NS, not significant).
